# Supplementary material for: Structure–Activity Relationships of the Antimalarial Agent Artemisinin 10. Synthesis and Antimalarial Activity of Enantiomers of rac-5β-Hydroxy-d-Secoartemisinin and Analogs: Implications Regarding the Mechanism of Action
Source: MDPI journal article supplement (doi:10.3390/molecules26144163), 2021-07-08
Supplement: s1 [file s1]

# Structure-Activity Relationships of the Antimalarial Agent Artemisinin 10. Synthesis and Antimalarial Activity of Enantiomers of *rac*-5 $\beta$ -Hydroxy-D-Secoartemisinin and Analogs: Implications Regarding the Mechanism of Action.

Mohamed Jahan<sup>1</sup>, Francisco Leon<sup>2</sup>, Frank Fronczek<sup>3</sup>, Khaled M. Elokely<sup>4,5</sup>, John Rimoldi<sup>1</sup>, Shabana Khan<sup>6</sup> and Mitchell A. Avery<sup>1,\*</sup>

1. Department of BioMolecular Sciences, Division Medicinal Chemistry, School of Pharmacy, P.O. Box 1848, University of Mississippi, University, MS 38677-1848; mavery@olemiss.edu; jahan@olemiss.edu; jrimoldi@olemiss.edu

2. Department of Drug Discovery and Biomedical Sciences, University of South Carolina, Columbia SC, 29208; JLEON@mailbox.sc.edu

3. Department of Chemistry, Louisiana State University, Baton Rouge, LA. 70803-1804; ffroncz@lsu.edu

4. Department of Pharmaceutical Chemistry, Tanta University, 31527 Tanta, Egypt.

5. Institute for Computational Molecular Science and Department of Chemistry, Temple University, Philadelphia, Pennsylvania 19122, United States; [kelokely@temple.edu](mailto:kelokely@temple.edu)

6. National Center for Natural Product Research, University of Mississippi, University, MS 38677; [skhan@olemiss.edu](mailto:skhan@olemiss.edu)

\*Correspondence: [mavery@olemiss.edu](mailto:mavery@olemiss.edu); mavery446@gmail.com; Tel.: 662-816-3315

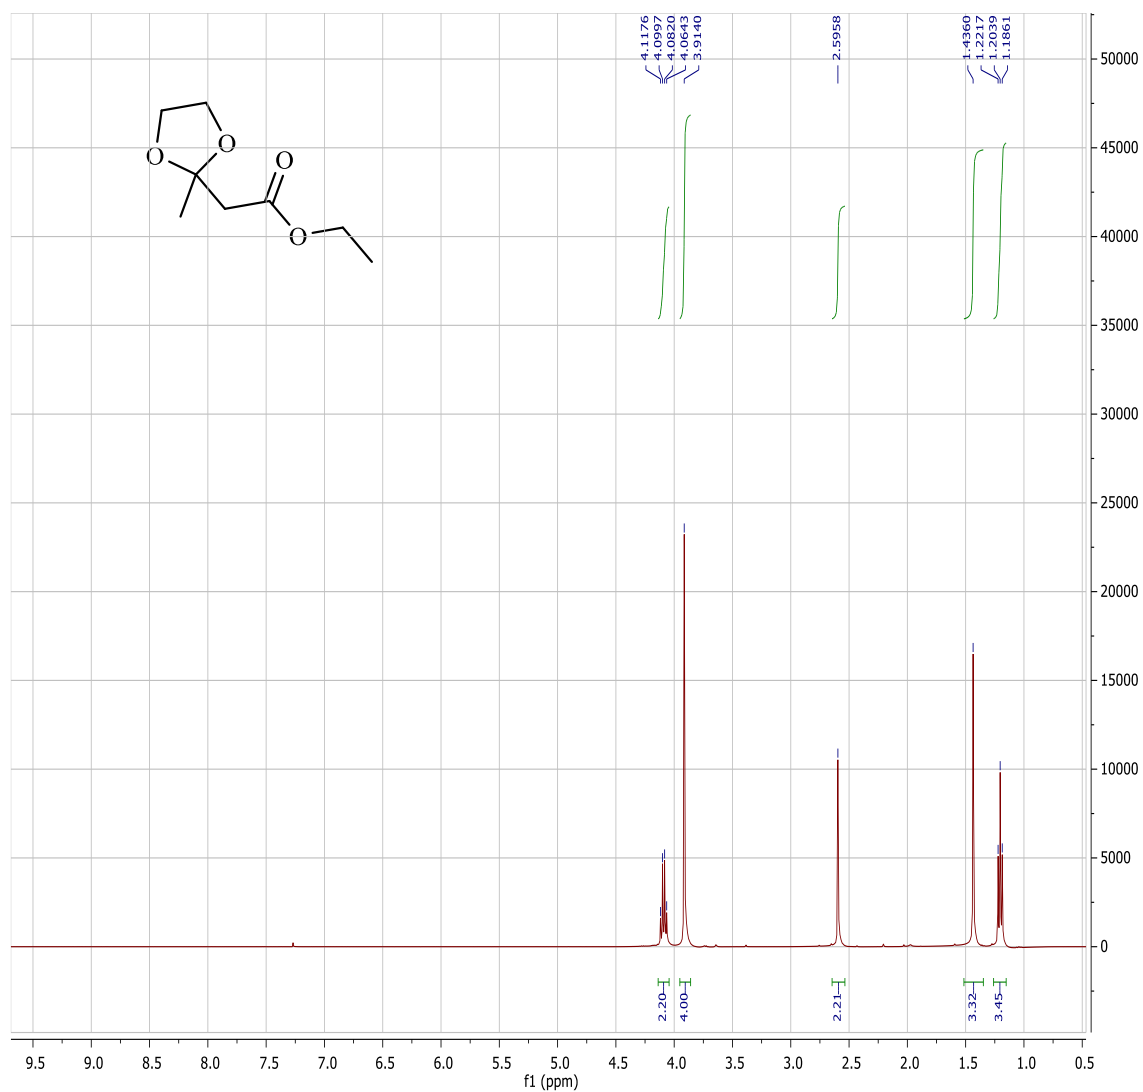

Figure S1.  $^1\text{H}$ -spectrum of the compound **3** ( $\text{CDCl}_3$ , 400 MHz).

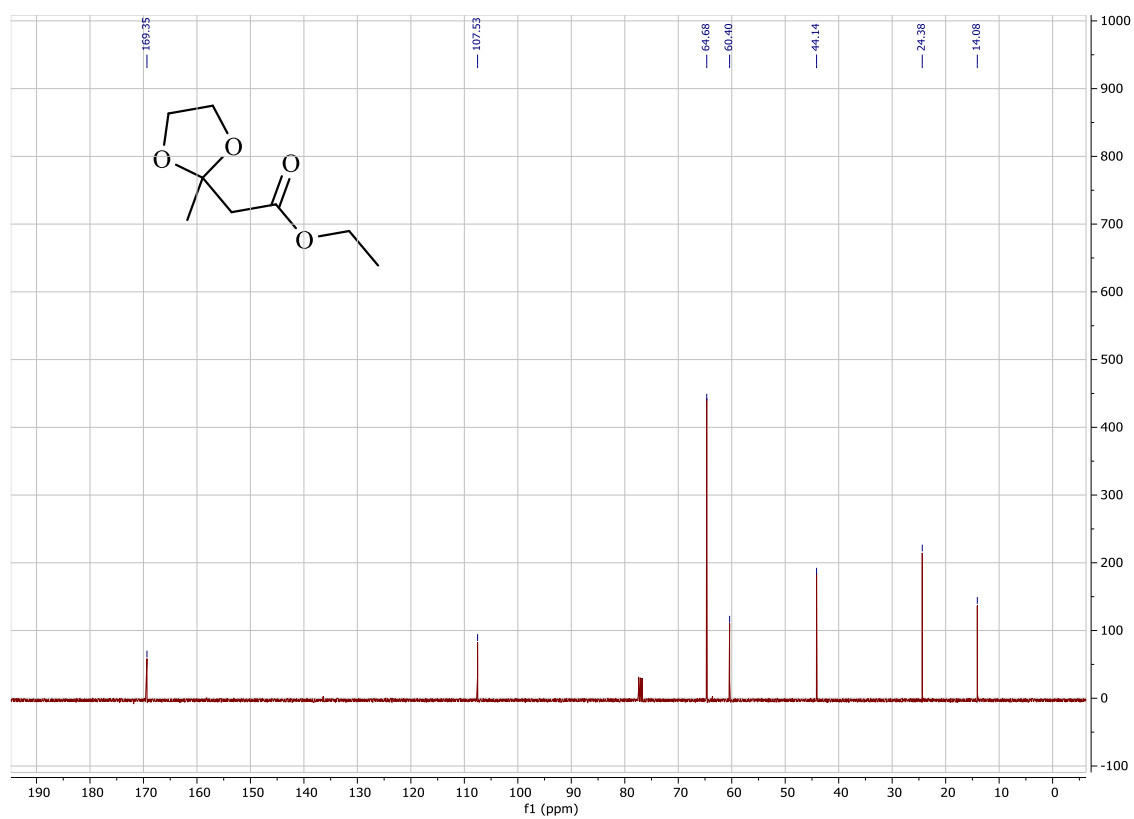

Figure S2.  $^{13}\text{C}$ -NMR spectrum of the compound **3** ( $\text{CDCl}_3$ , 100 MHz).

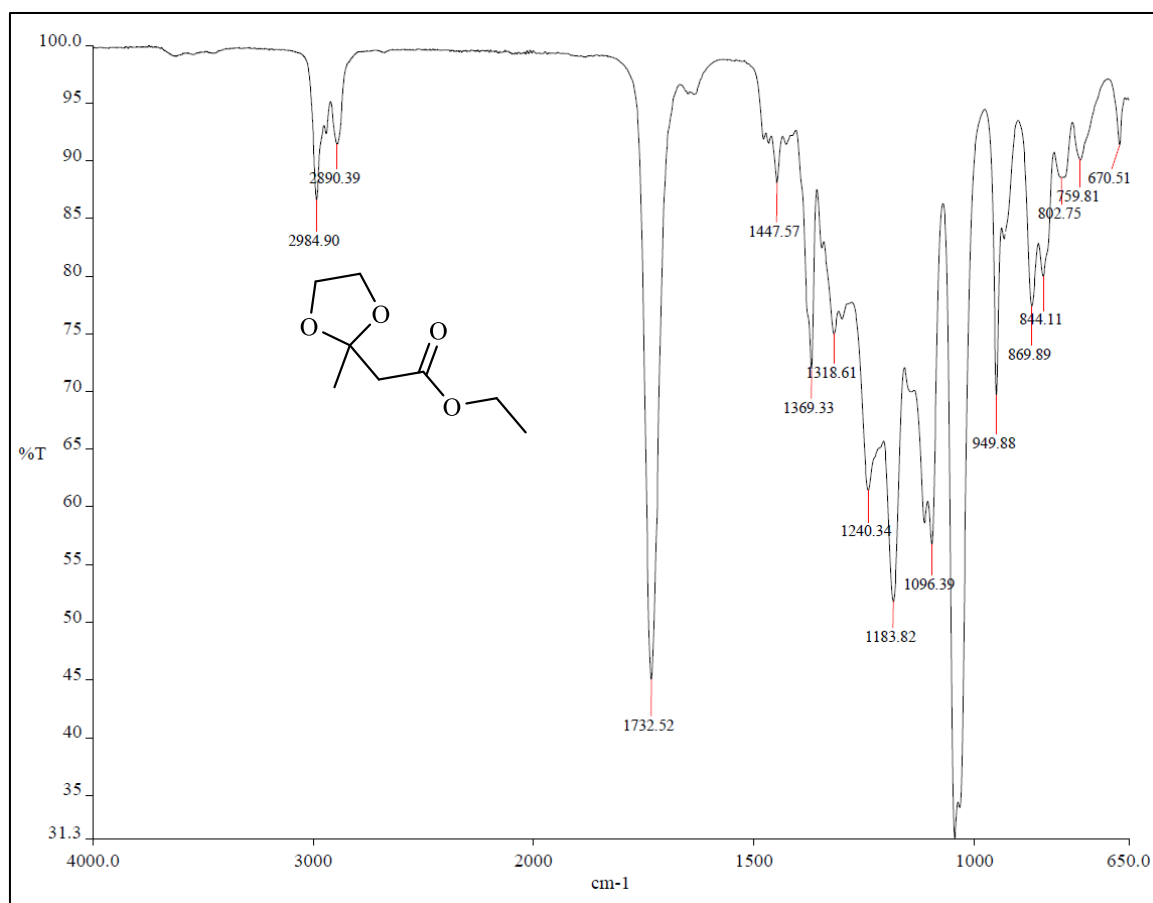

Figure S3. IR-spectrum of the compound 3.



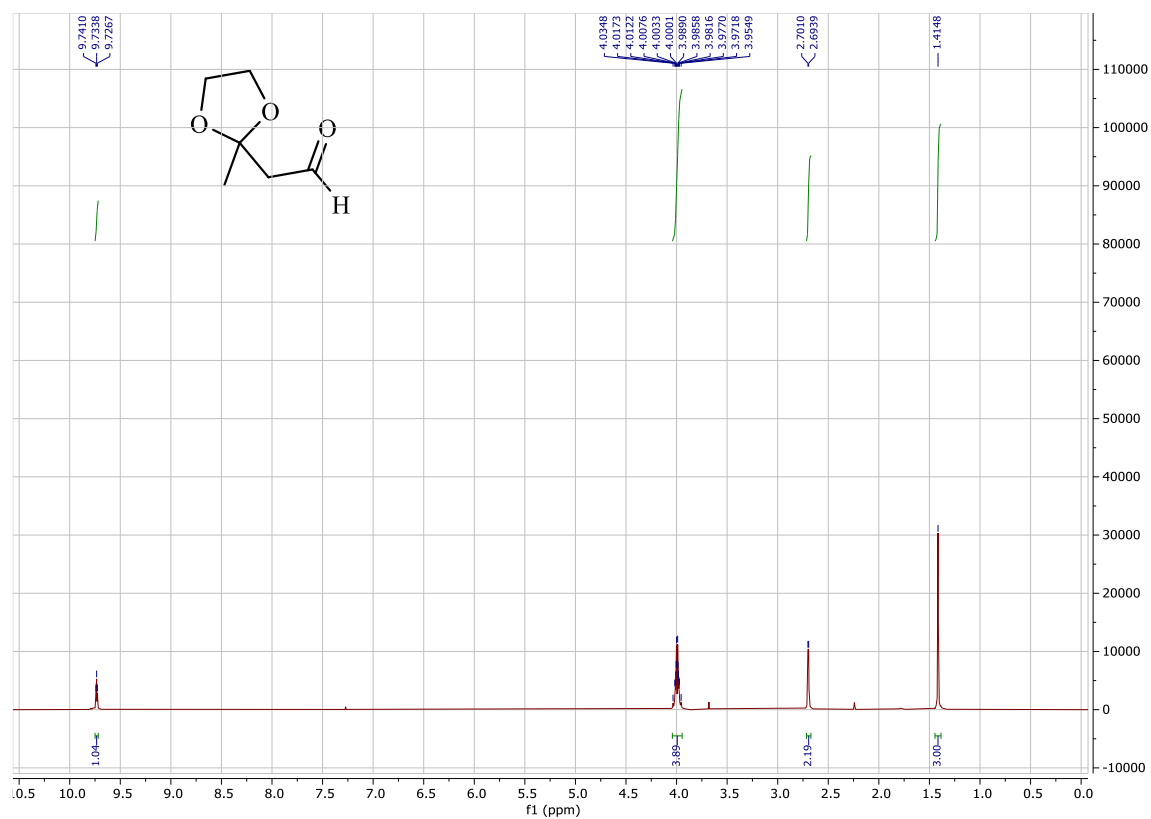

Figure S4.  $^1\text{H}$ -spectrum of the compound **4** ( $\text{CDCl}_3$ , 400 MHz).

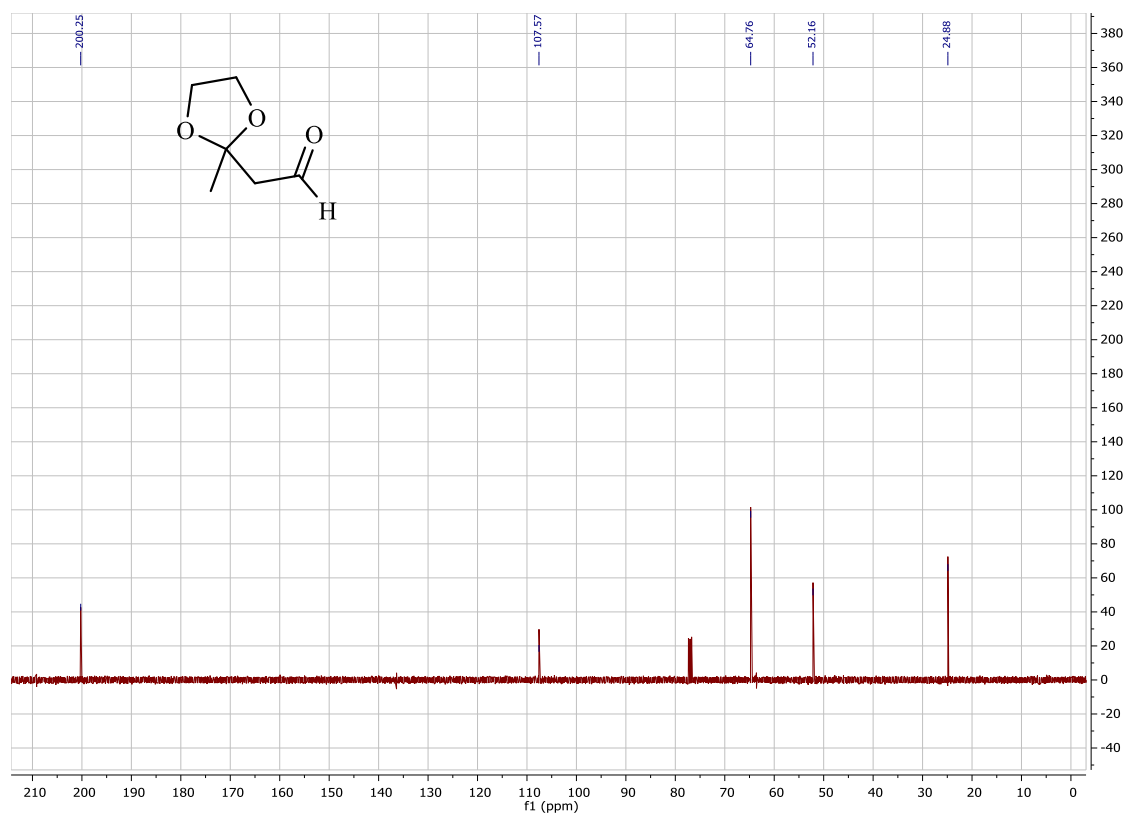

Figure S5. <sup>13</sup>C-NMR spectrum of the compound **4** (CDCl<sub>3</sub>, 100 MHz).

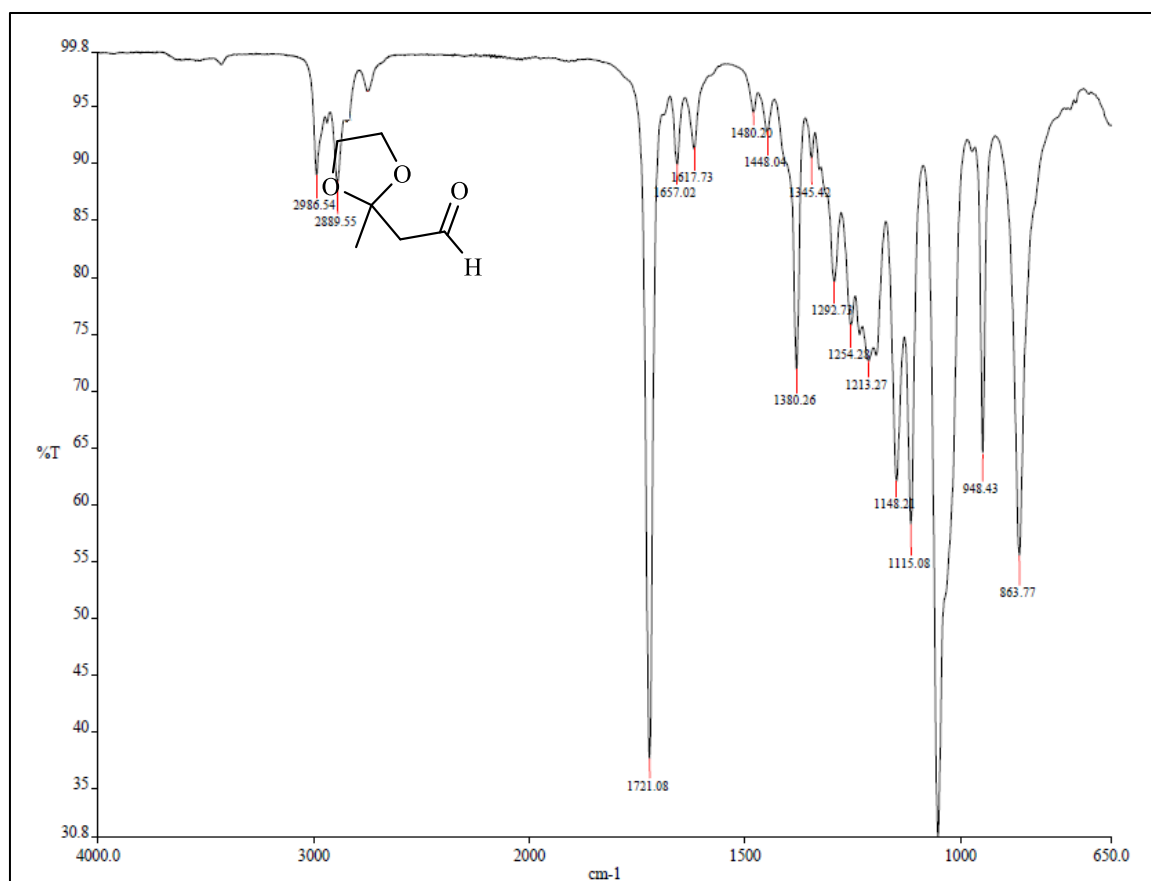

Figure S6. IR-spectrum of the compound **4**.

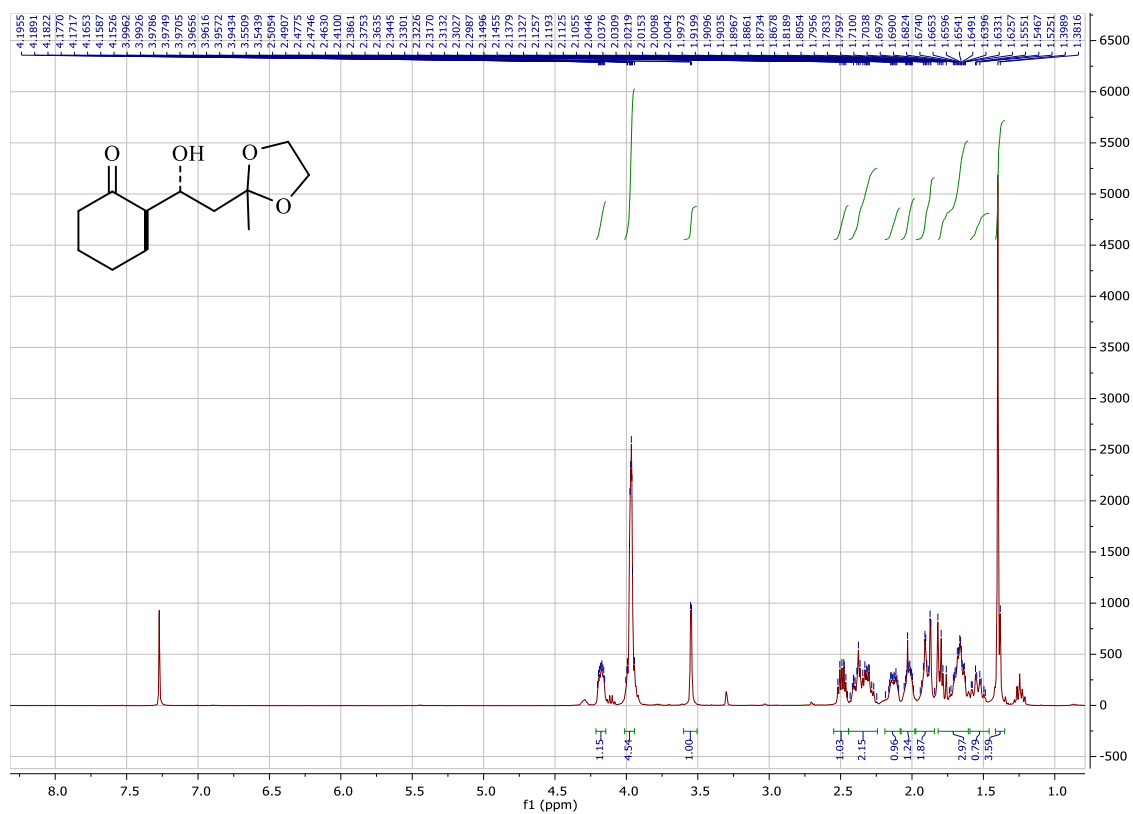

Figure S7. <sup>1</sup>H-spectrum of the compound **5** (CDCl<sub>3</sub>, 400 MHz).

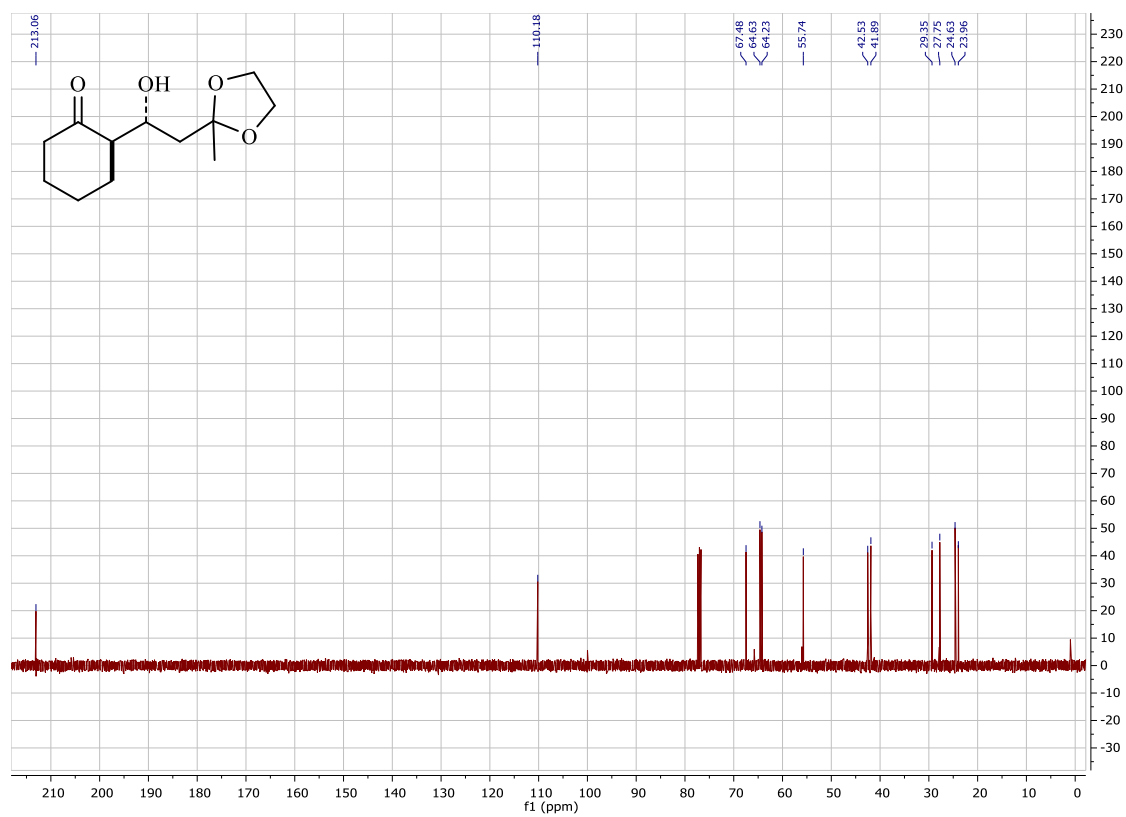

Figure S8.  $^{13}\text{C}$ -NMR spectrum of the compound 5 ( $\text{CDCl}_3$ , 100 MHz).

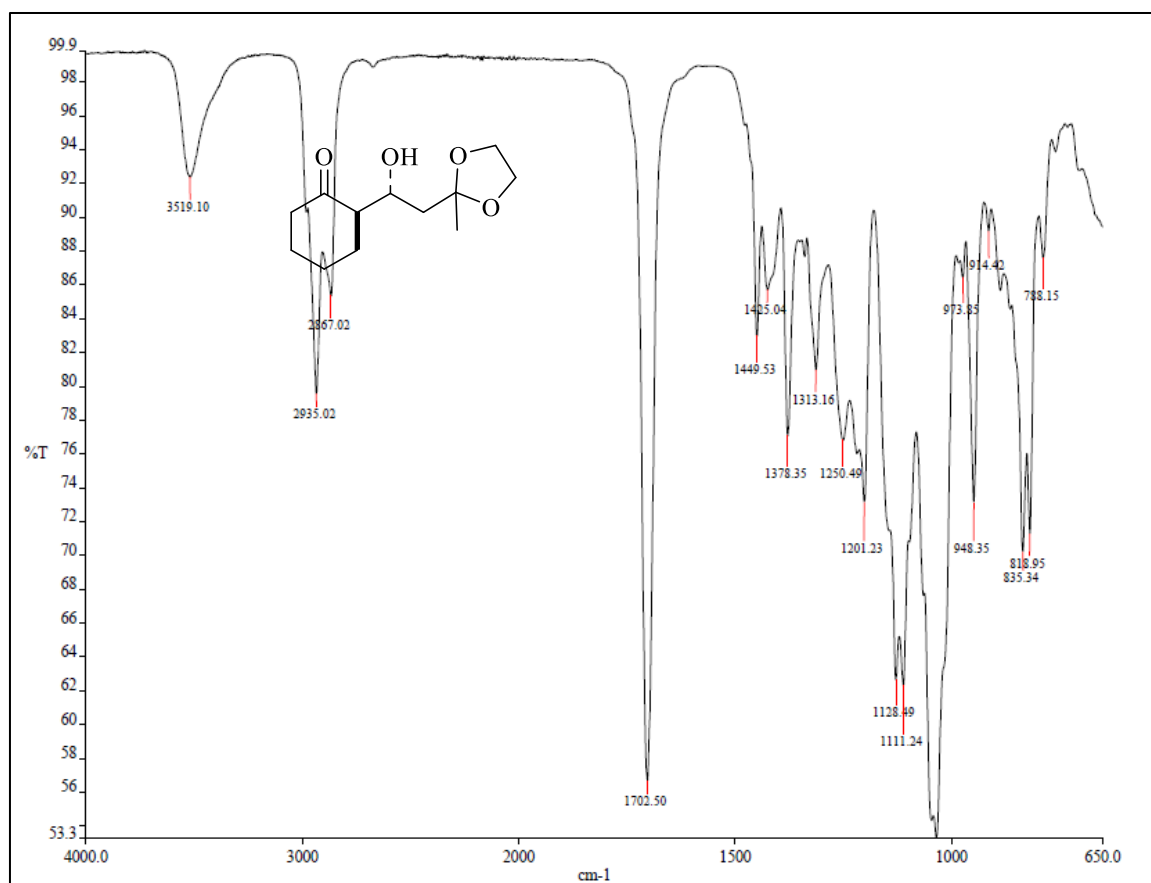

Figure S9. IR-spectrum of the compound 5.

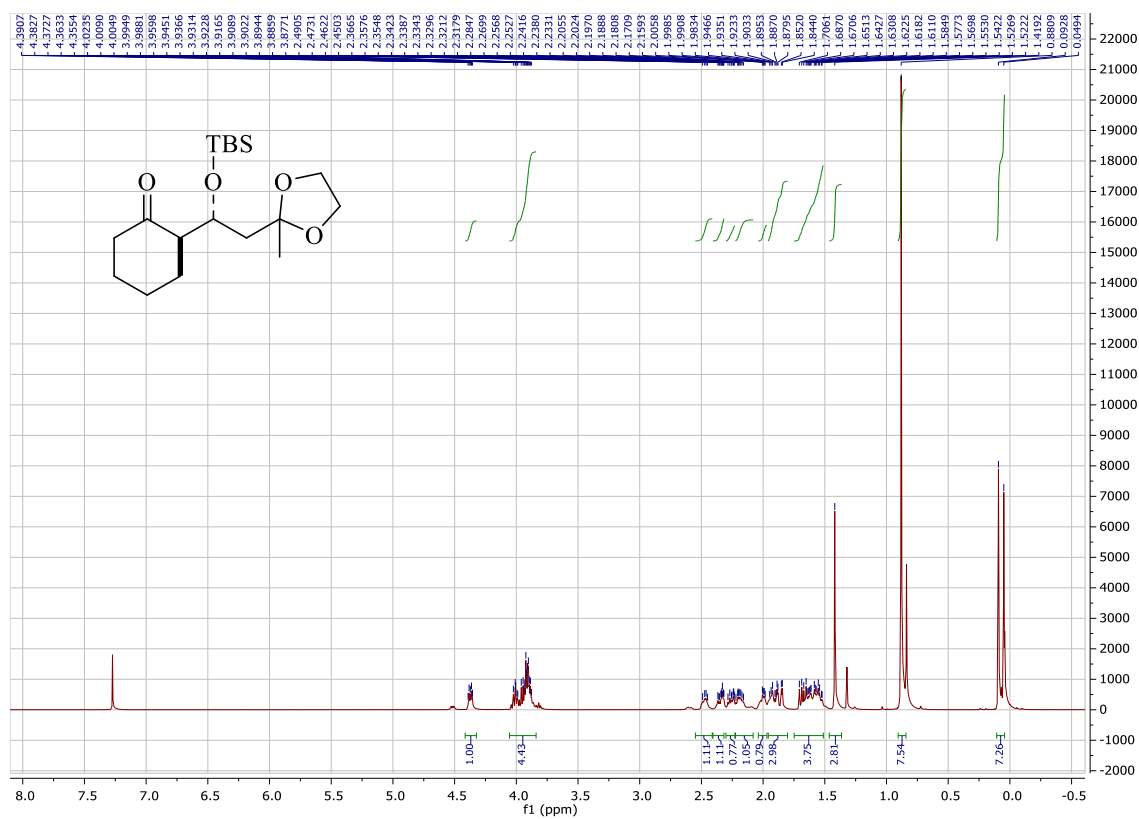

Figure S10. <sup>1</sup>H-spectrum of the compound 6 (CDCl<sub>3</sub>, 400 MHz).

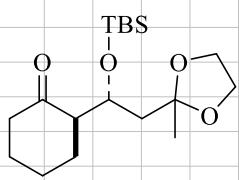

Figure S11. <sup>13</sup>C-NMR spectrum of the compound **6** (CDCl<sub>3</sub>, 100 MHz).



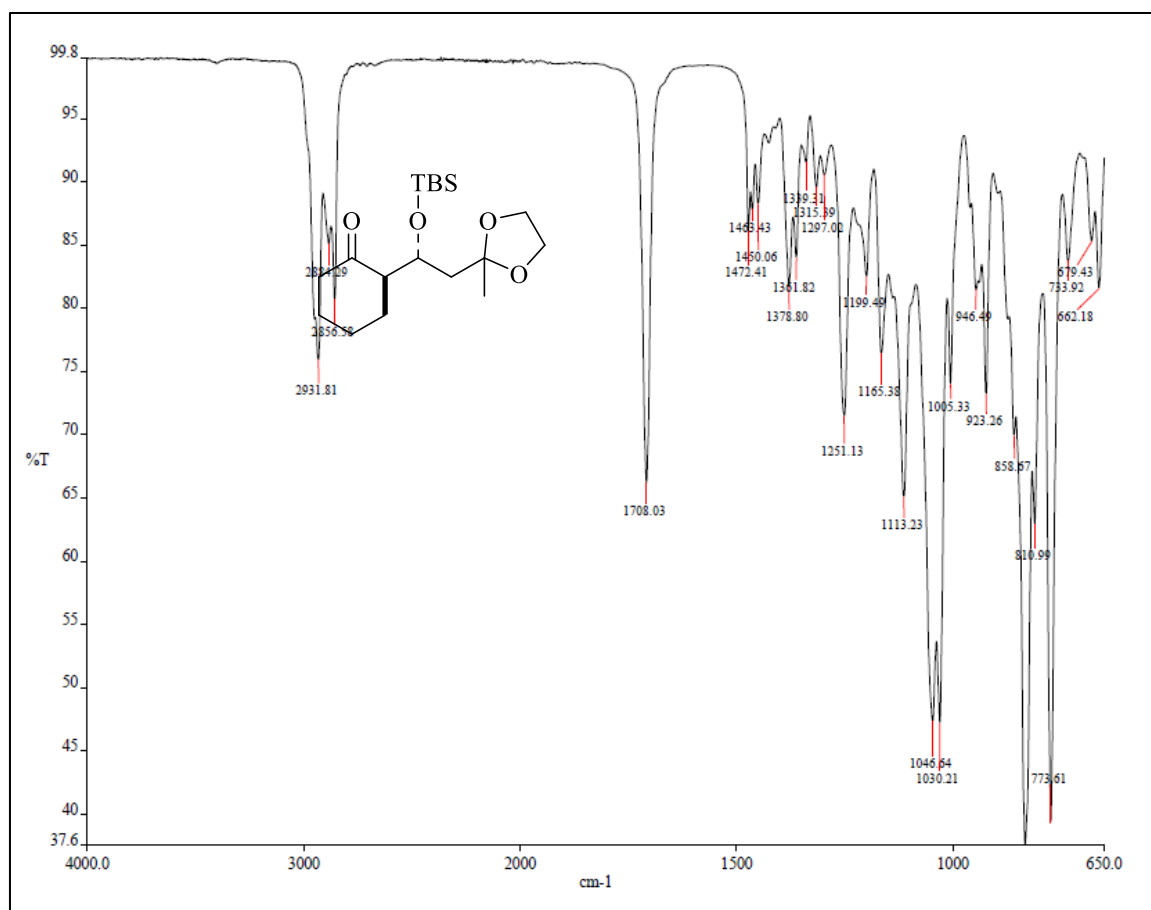

Figure S12. IR-spectrum of the compound 6.

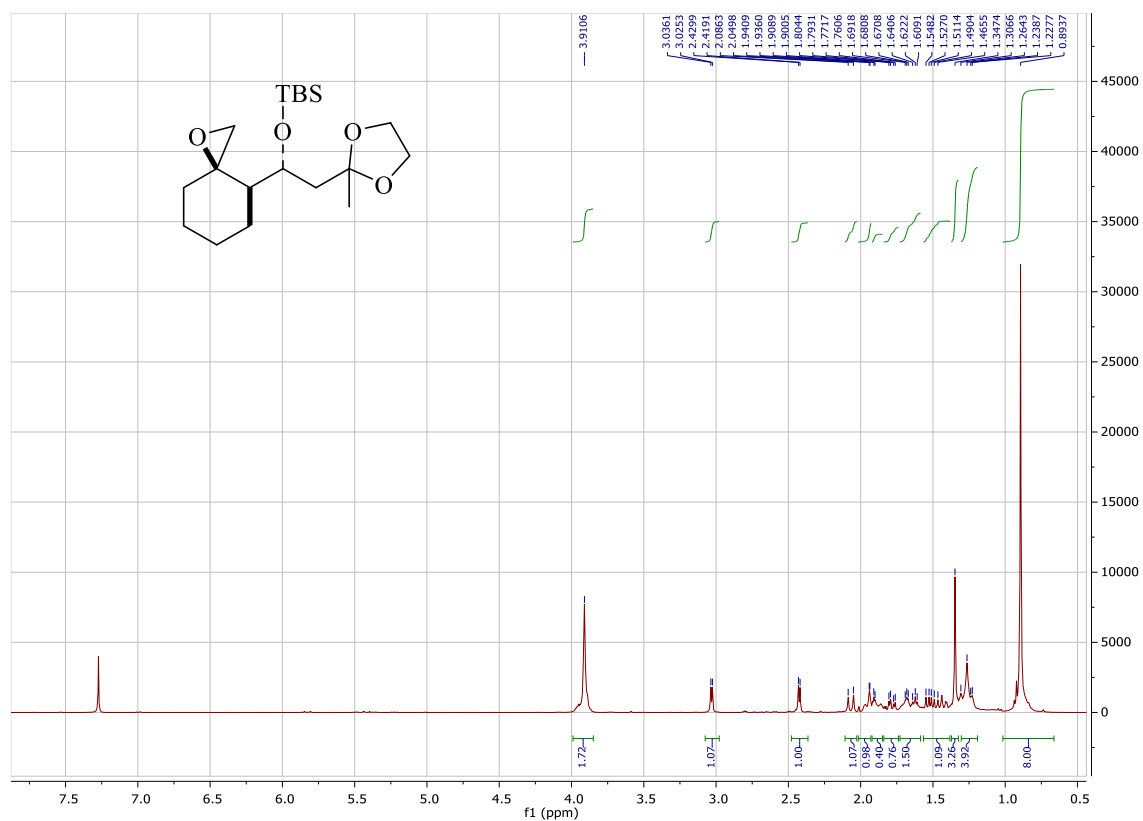

Figure S13. <sup>1</sup>H-spectrum of the compound 7 (CDCl<sub>3</sub>, 400 MHz).

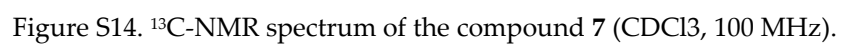

Figure S14. <sup>13</sup>C-NMR spectrum of the compound **7** (CDCl<sub>3</sub>, 100 MHz).

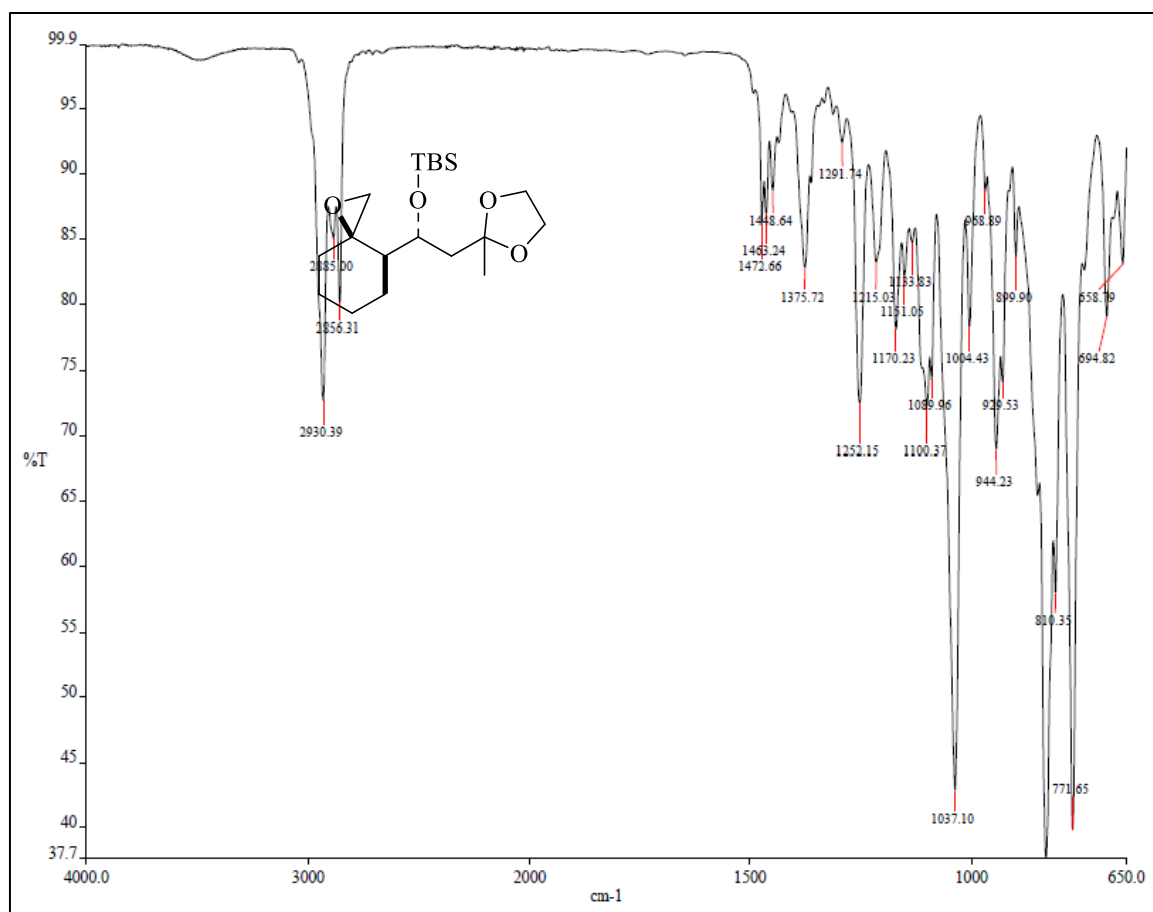

Figure S15. IR-spectrum of the compound 7.

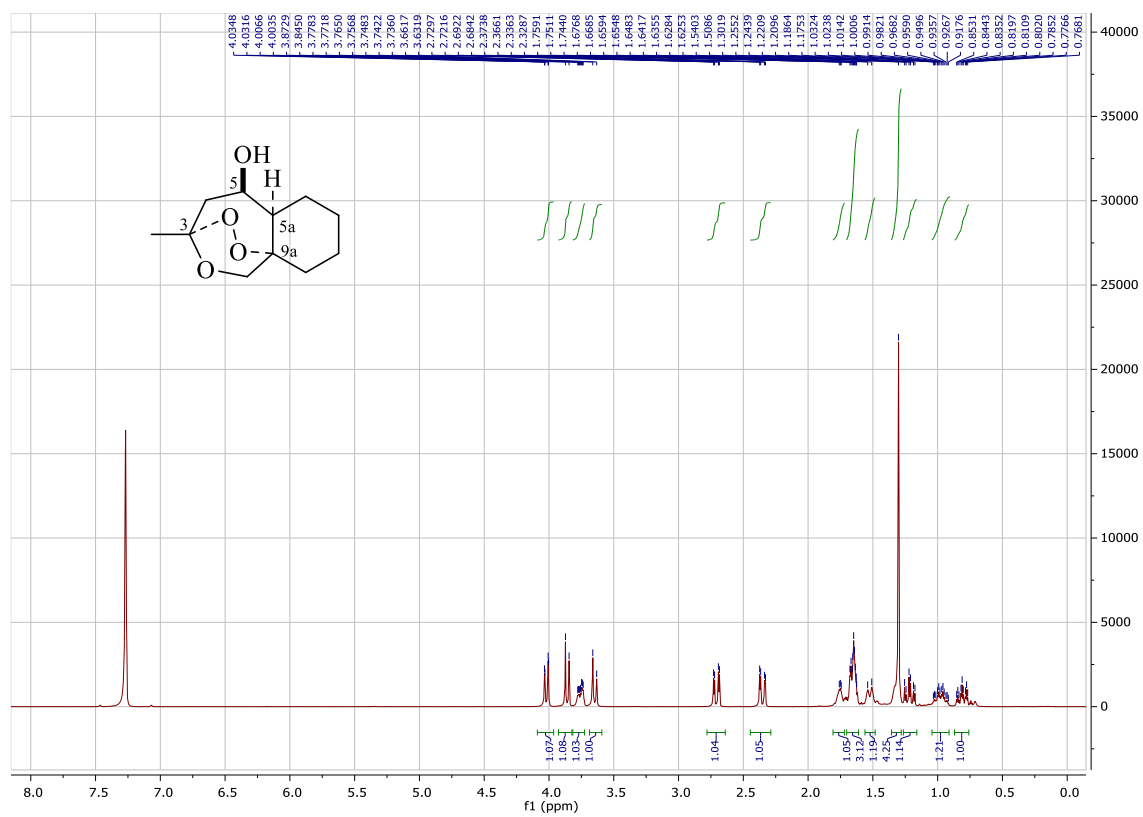

Figure S16.  $^1\text{H}$ -spectrum of the compound *rac-2* (CDCl<sub>3</sub>, 400 MHz).

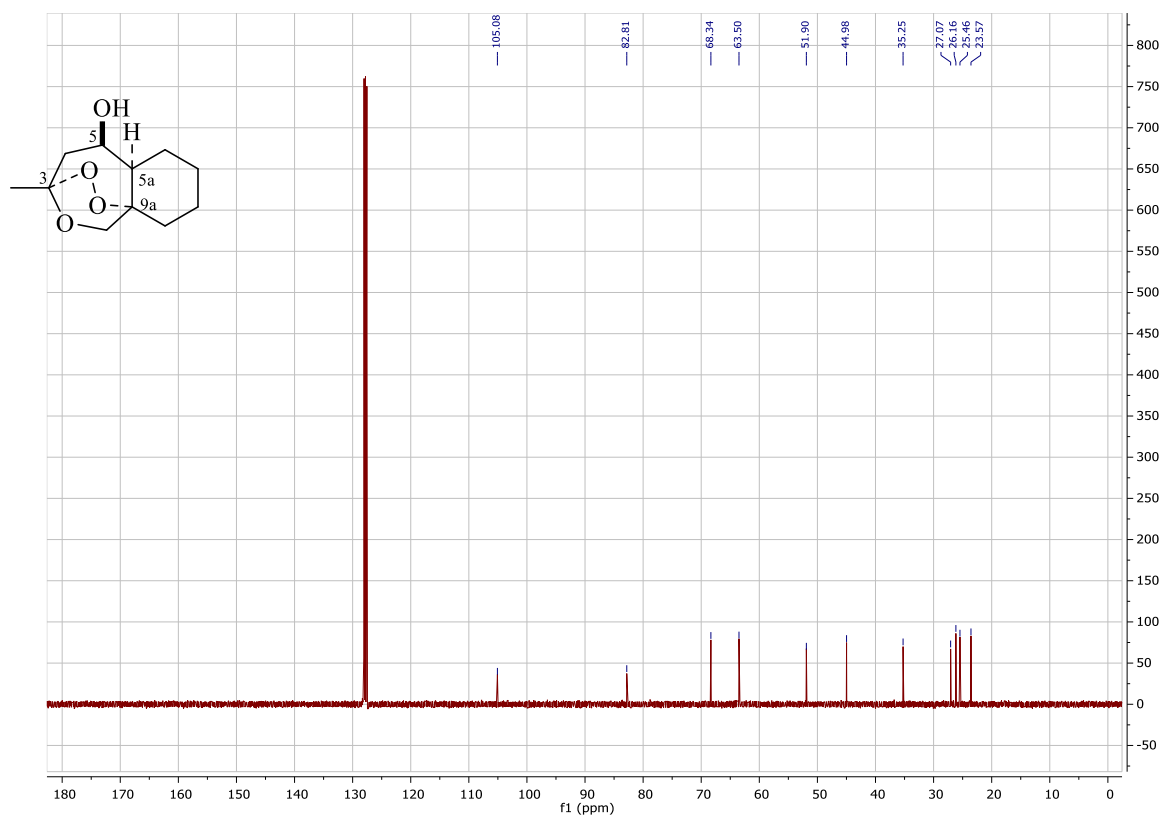

Figure S17.  $^{13}\text{C}$ -NMR spectrum of the compound *rac*-2 ( $\text{CDCl}_3$ , 100 MHz).

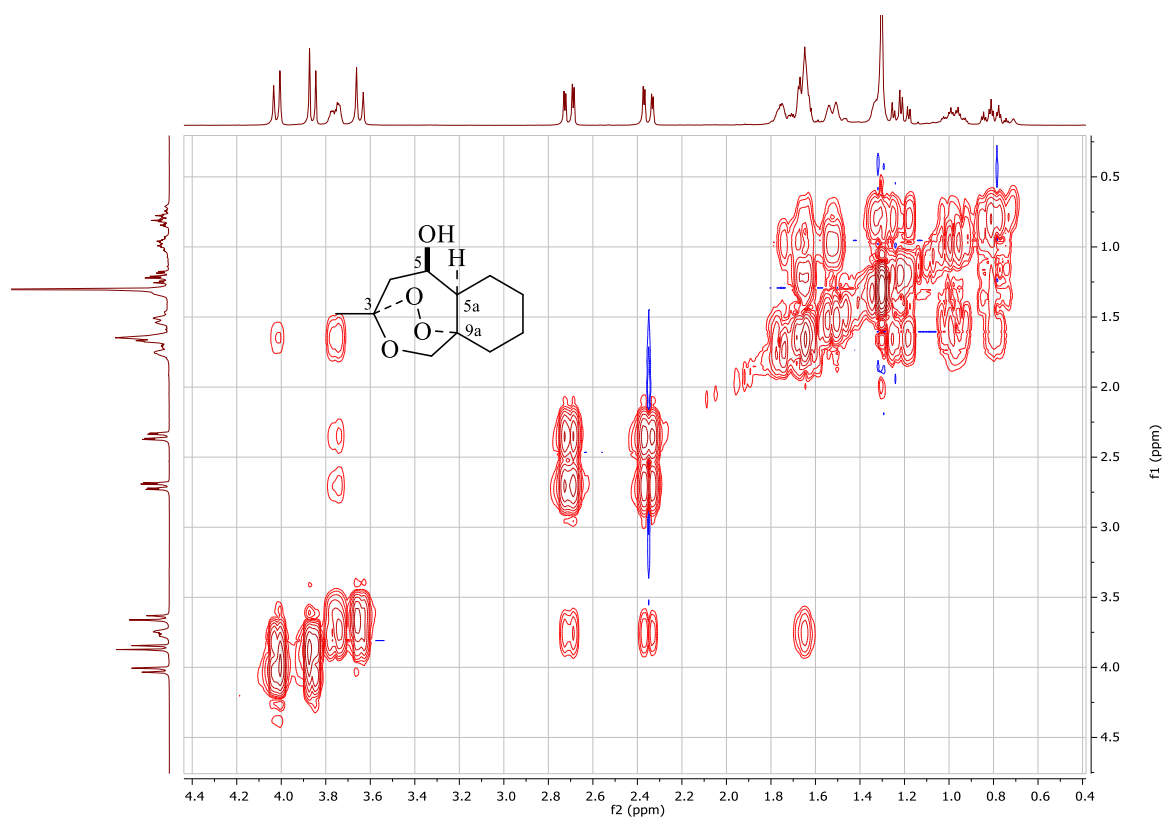

Figure S18. COSY spectrum of the compound *rac-2*

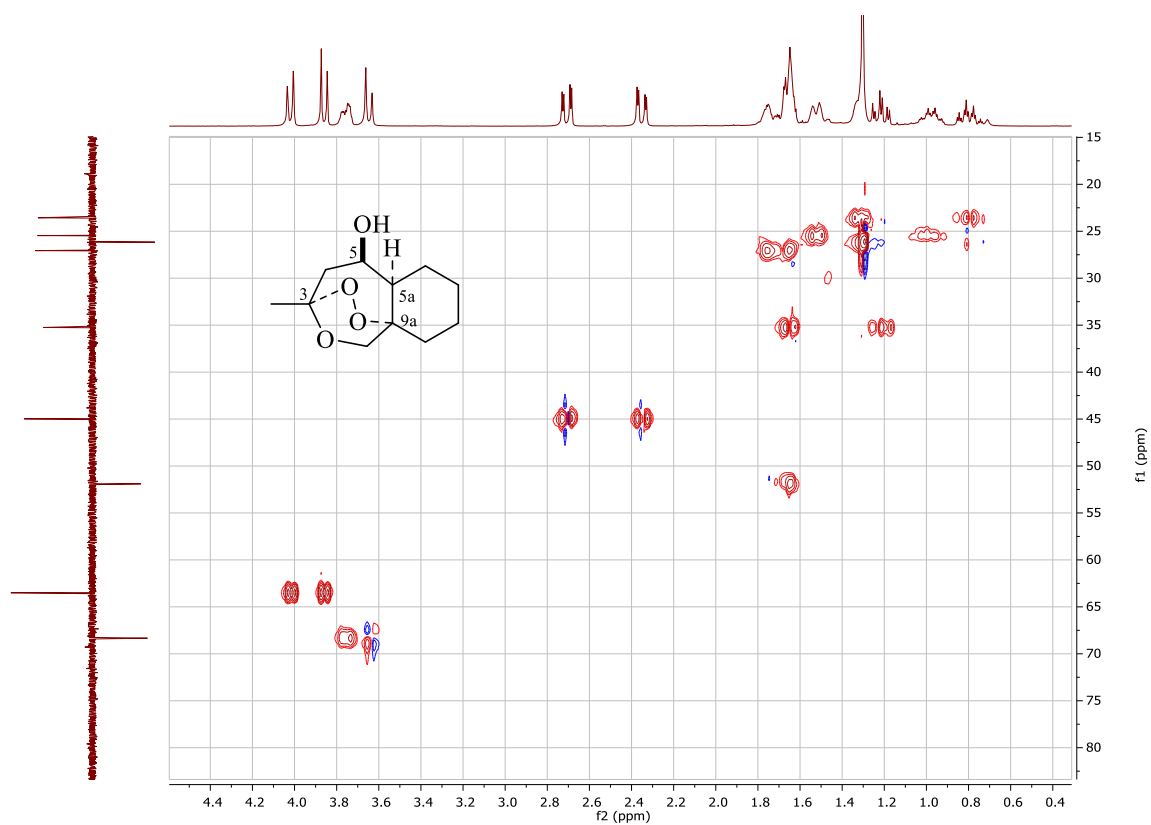

S18. HSQC spectrum of the compound *rac-2*

Figure



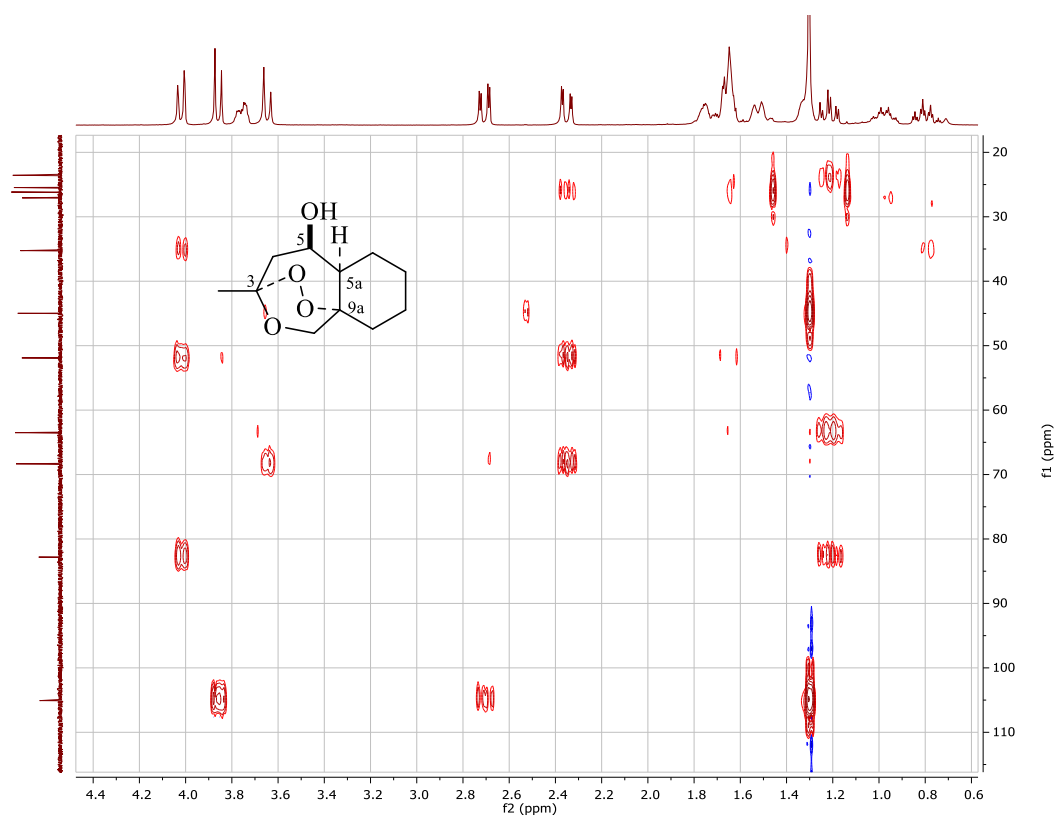

Figure S19. HMBC spectrum of the compound *rac-2*

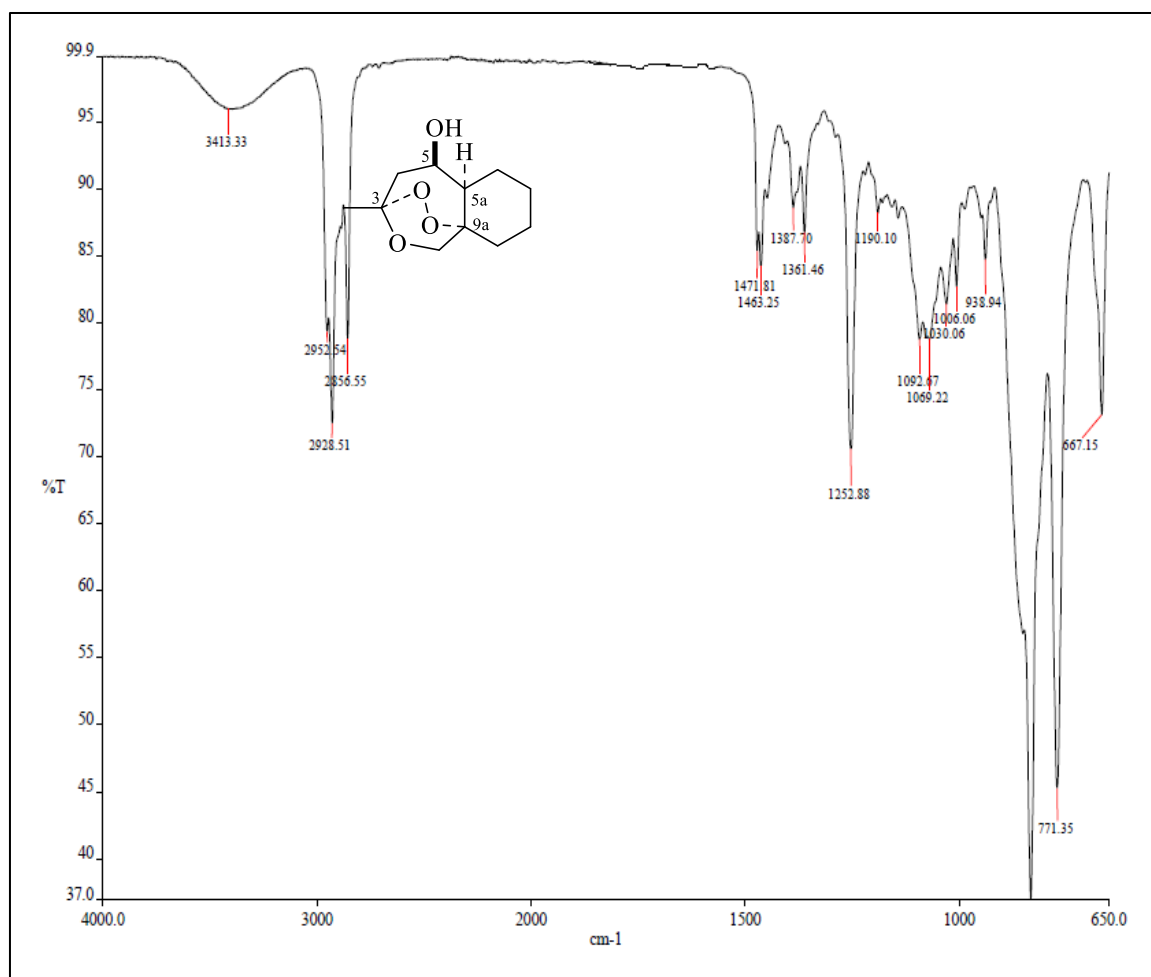

Figure S20. IR-spectrum of the compound *rac-2*

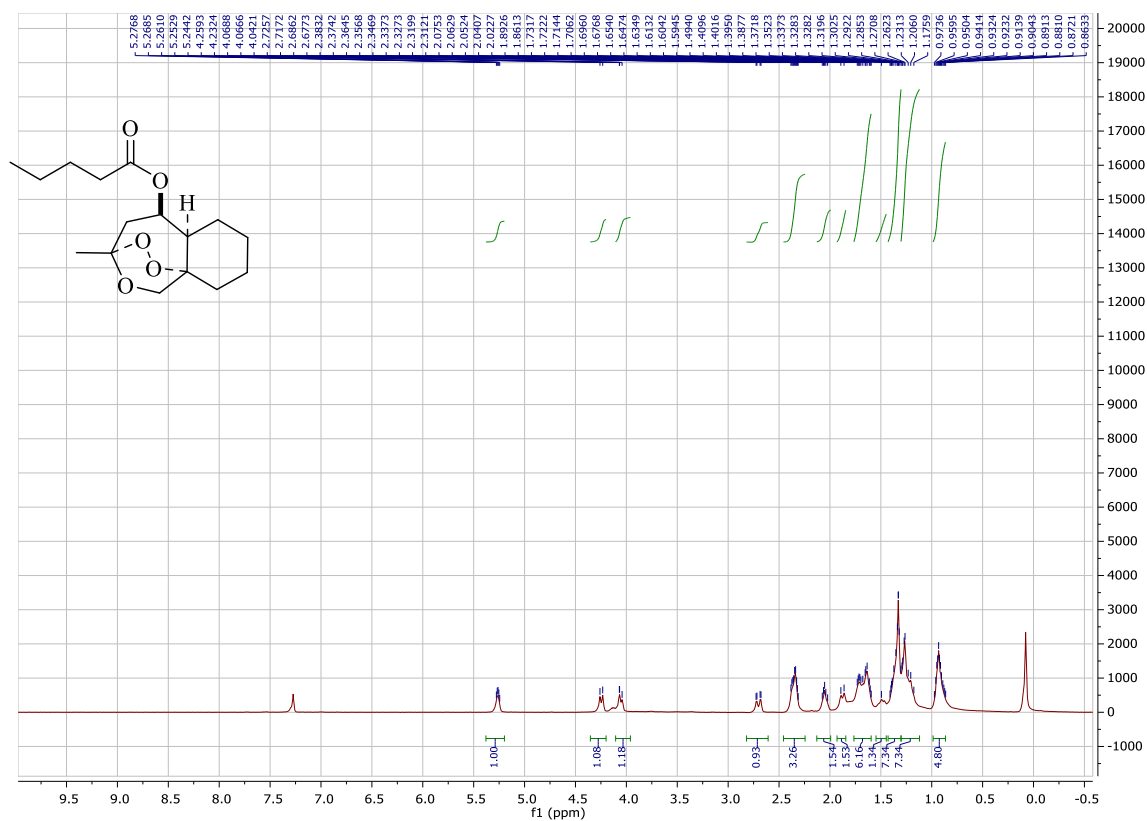

Figure S21. <sup>1</sup>H spectrum of the compound 9 (CDCl<sub>3</sub>, 400 MHz).

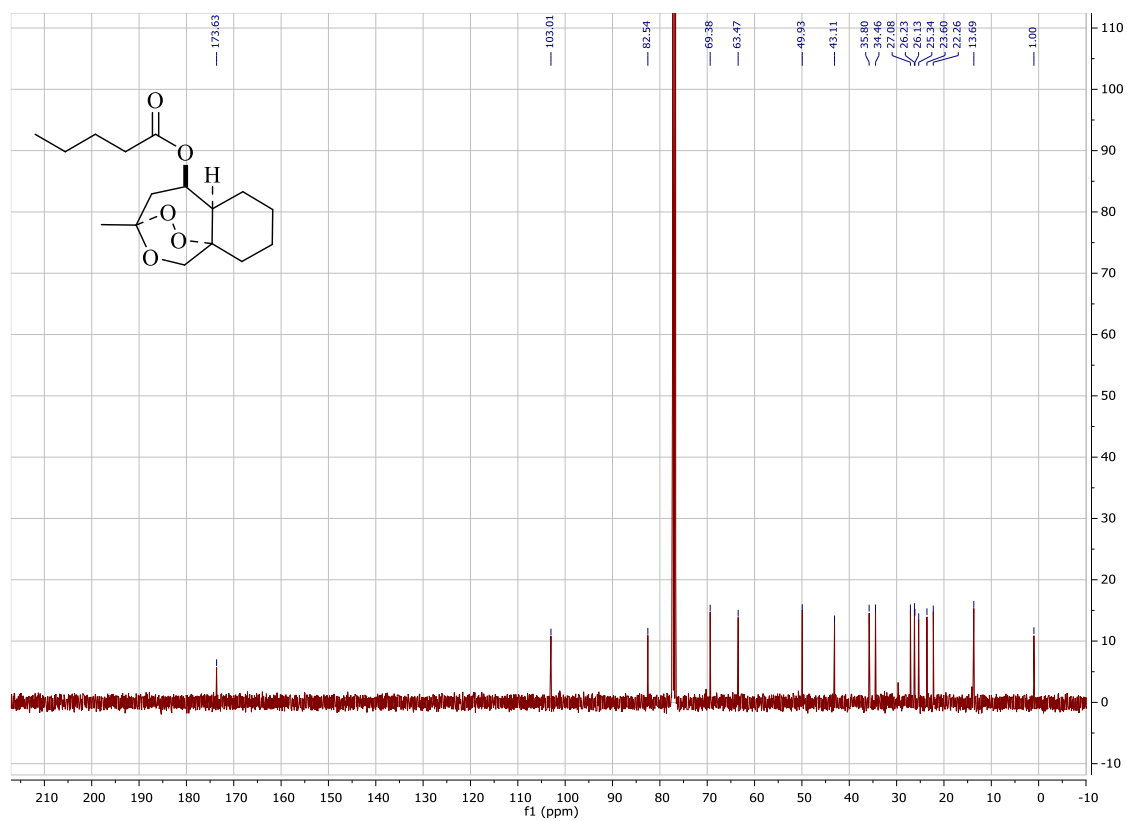

Figure S22. <sup>13</sup>C-NMR spectrum of the compound **9** (CDCl<sub>3</sub>, 100 MHz).

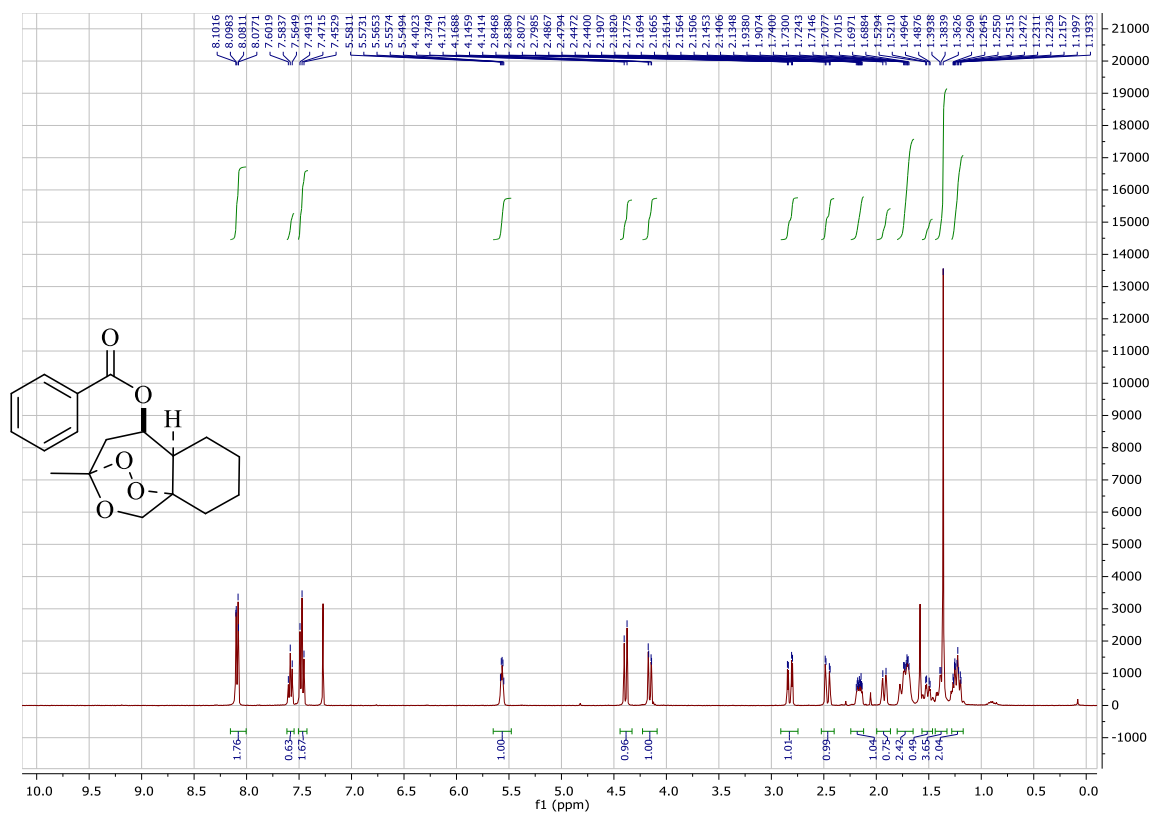

Figure S23. <sup>1</sup>H-spectrum of the compound **10** (CDCl<sub>3</sub>, 400 MHz).

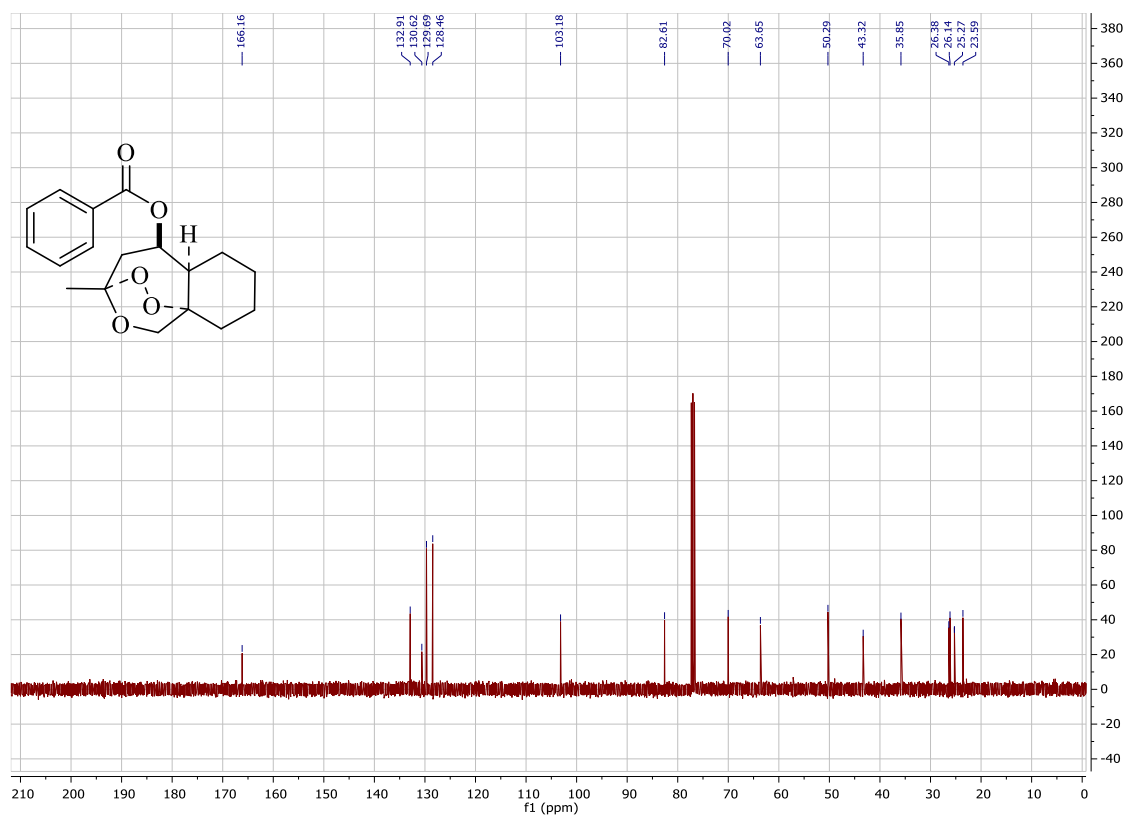

Figure S24. <sup>13</sup>C-NMR spectrum of the compound 10 (CDCl<sub>3</sub>, 100 MHz).

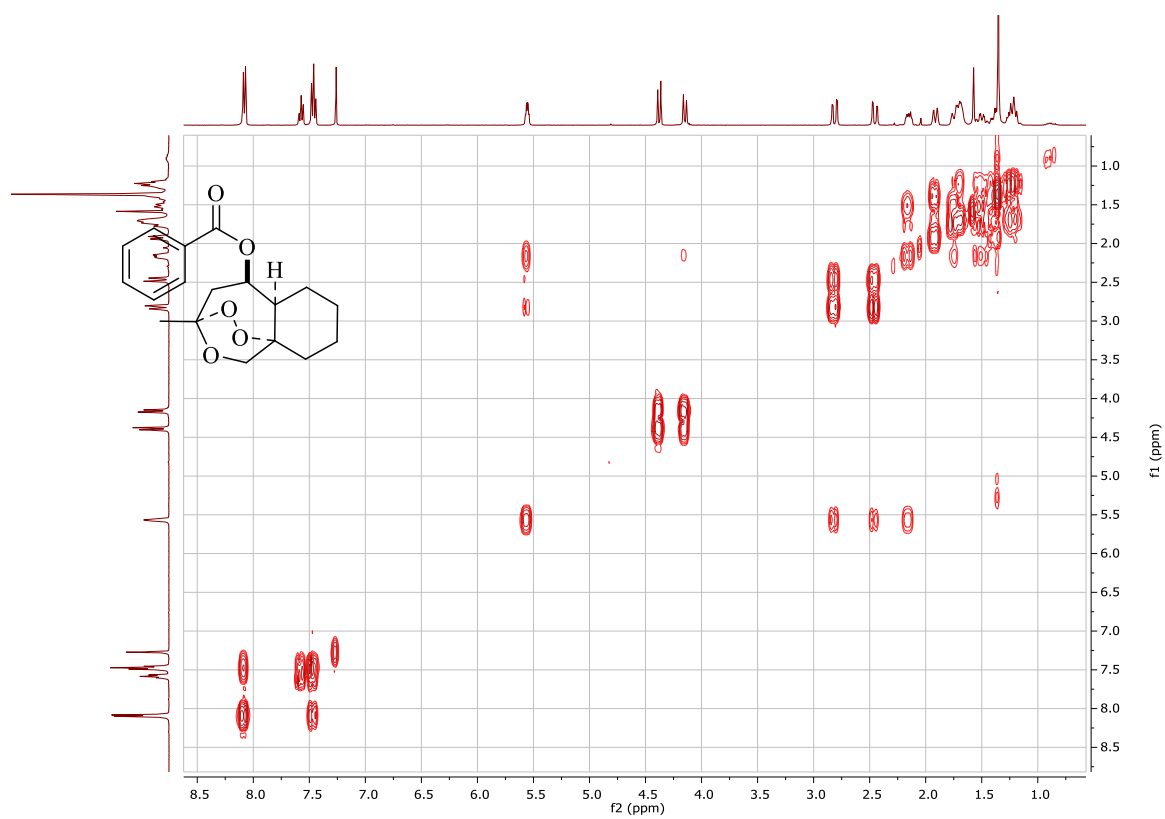

Figure S25. COSY spectrum of the compound 10.

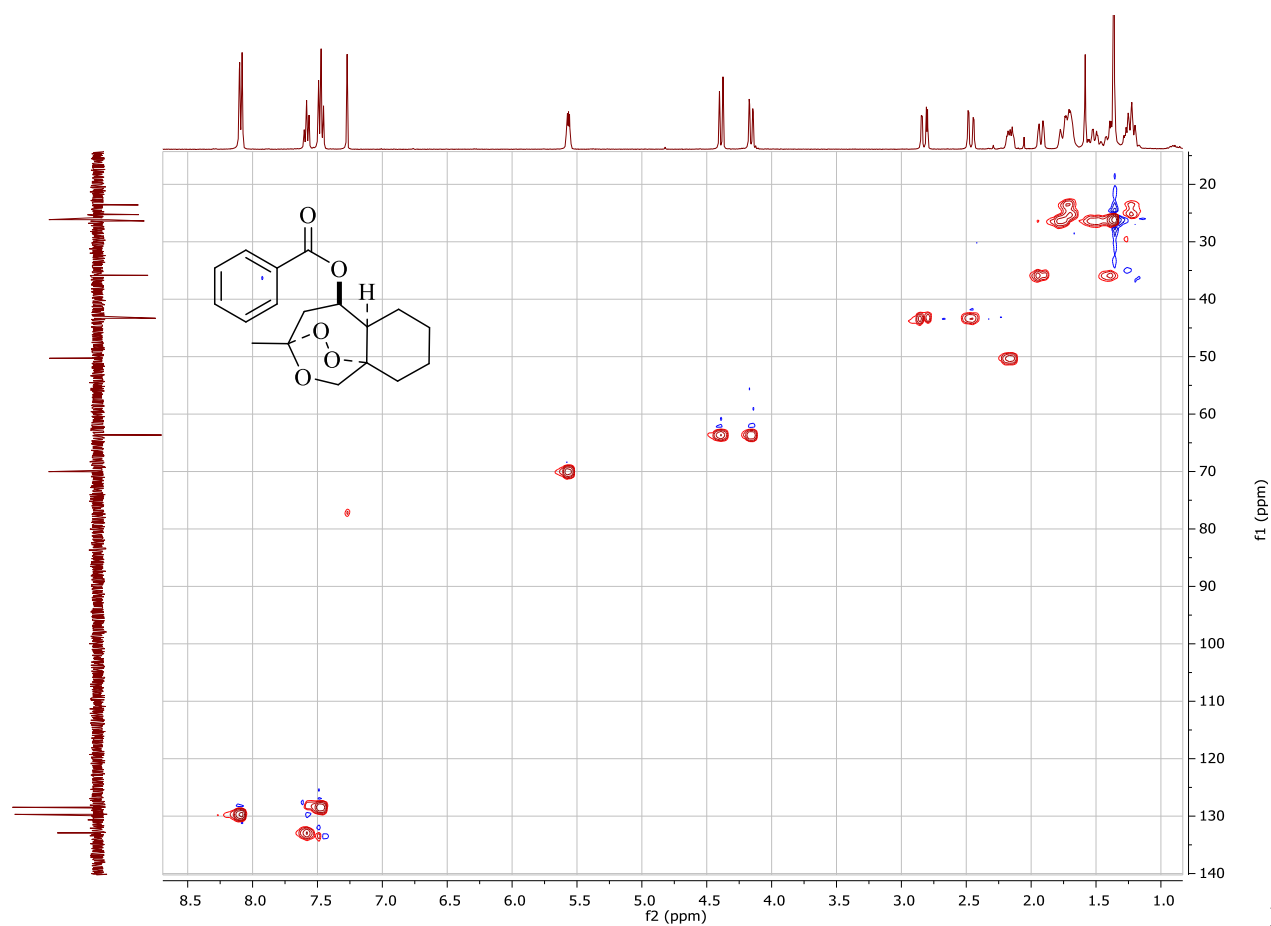

S26. HSQC spectrum of the compound 10.

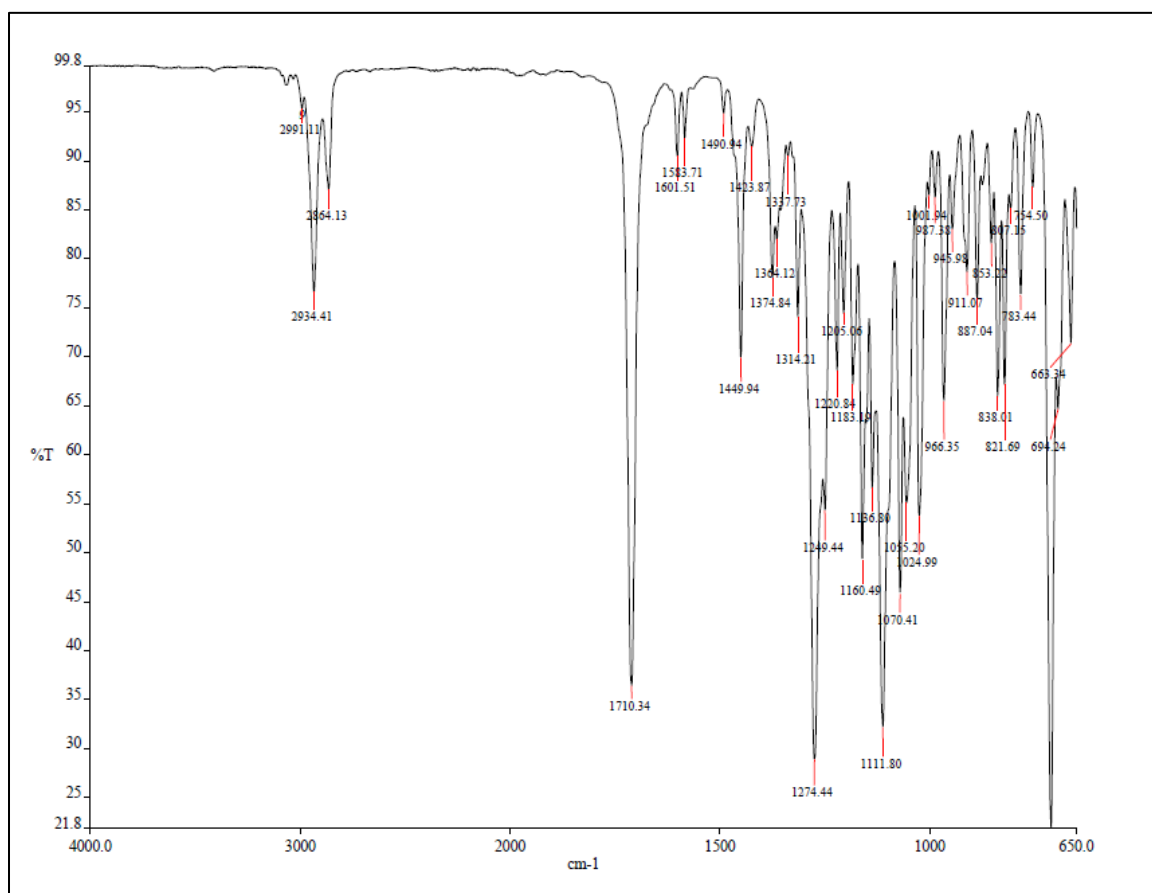

Figure S27. IR-spectrum of the compound 10.

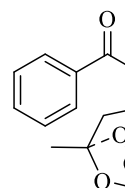



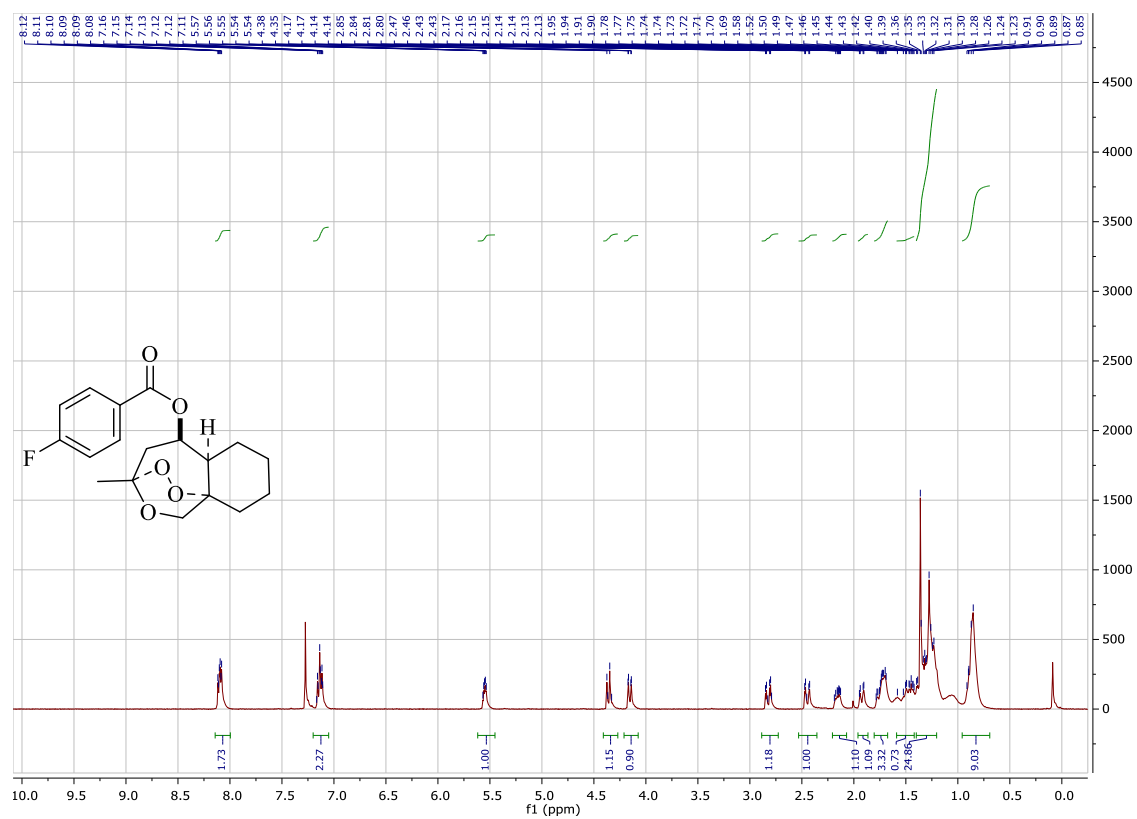

Figure S28. <sup>1</sup>H-spectrum of the compound **11** (CDCl<sub>3</sub>, 400 MHz).

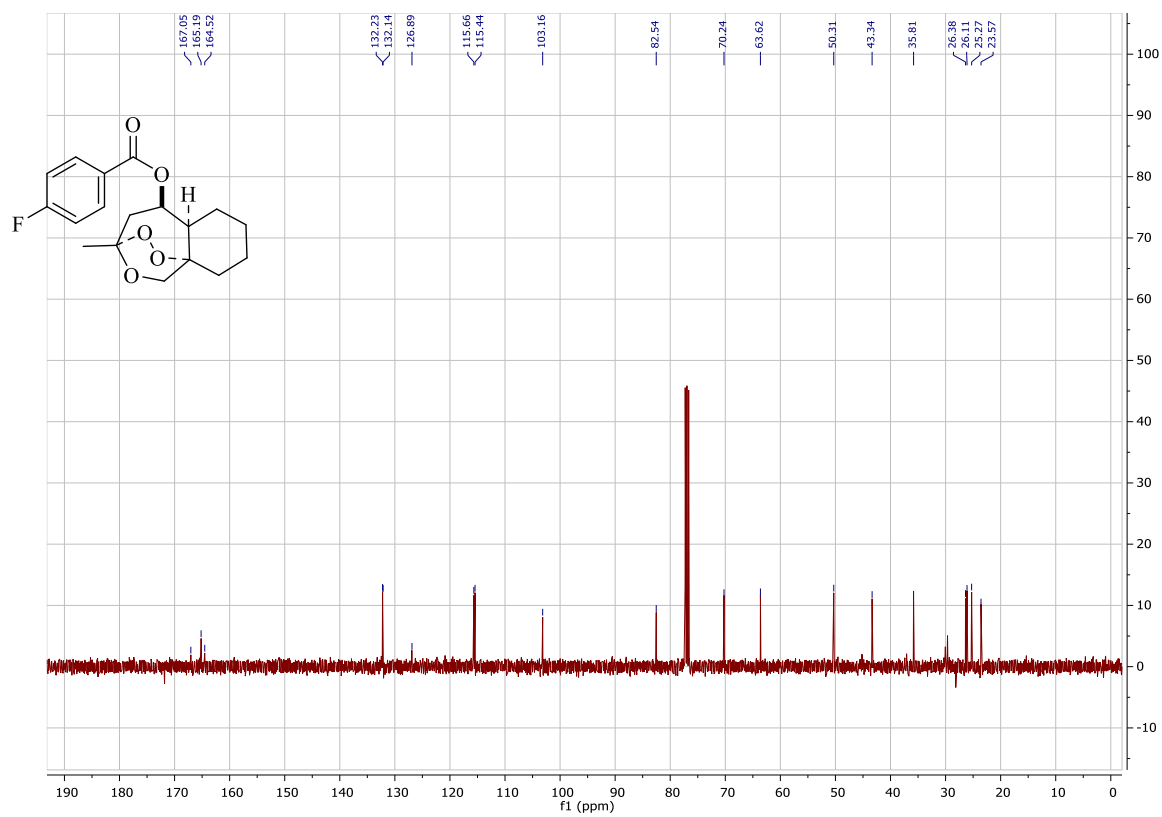

Figure S29. <sup>13</sup>C-NMR spectrum of the compound **11** (CDCl<sub>3</sub>, 100 MHz).

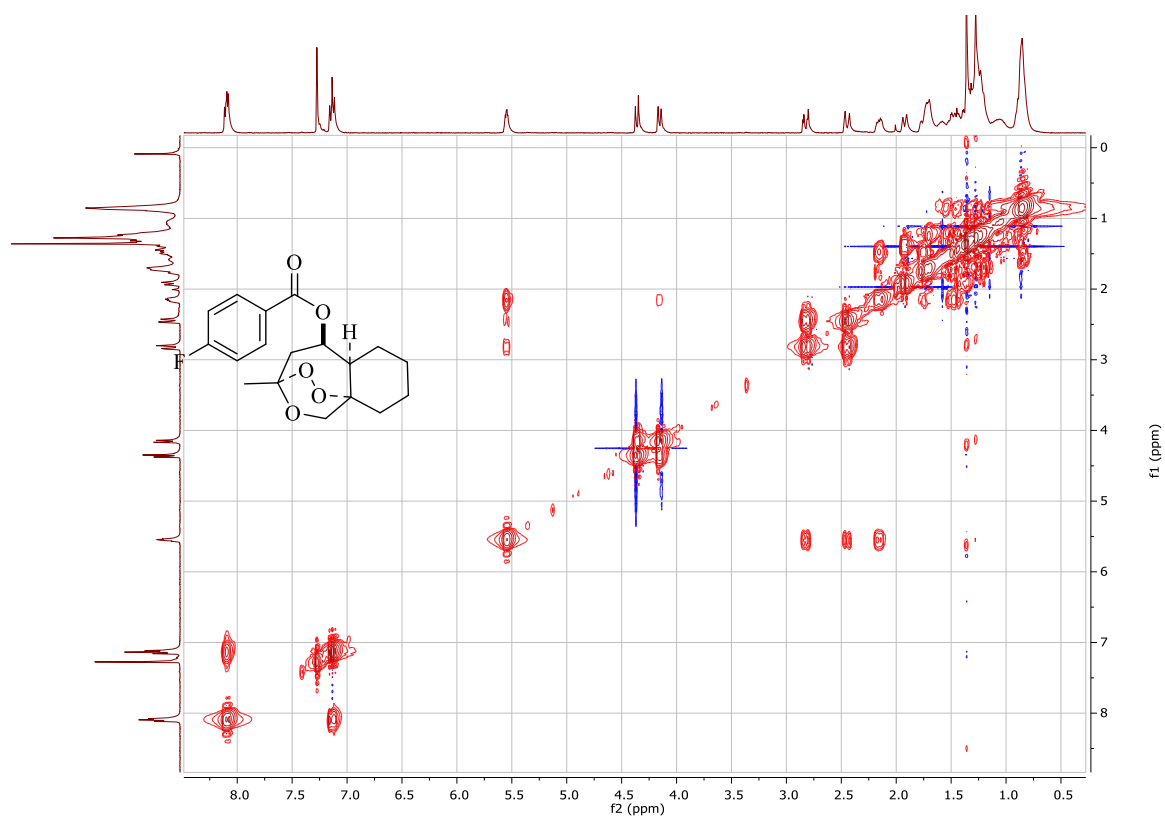

Figure S30. COSY spectrum of the compound **11**.

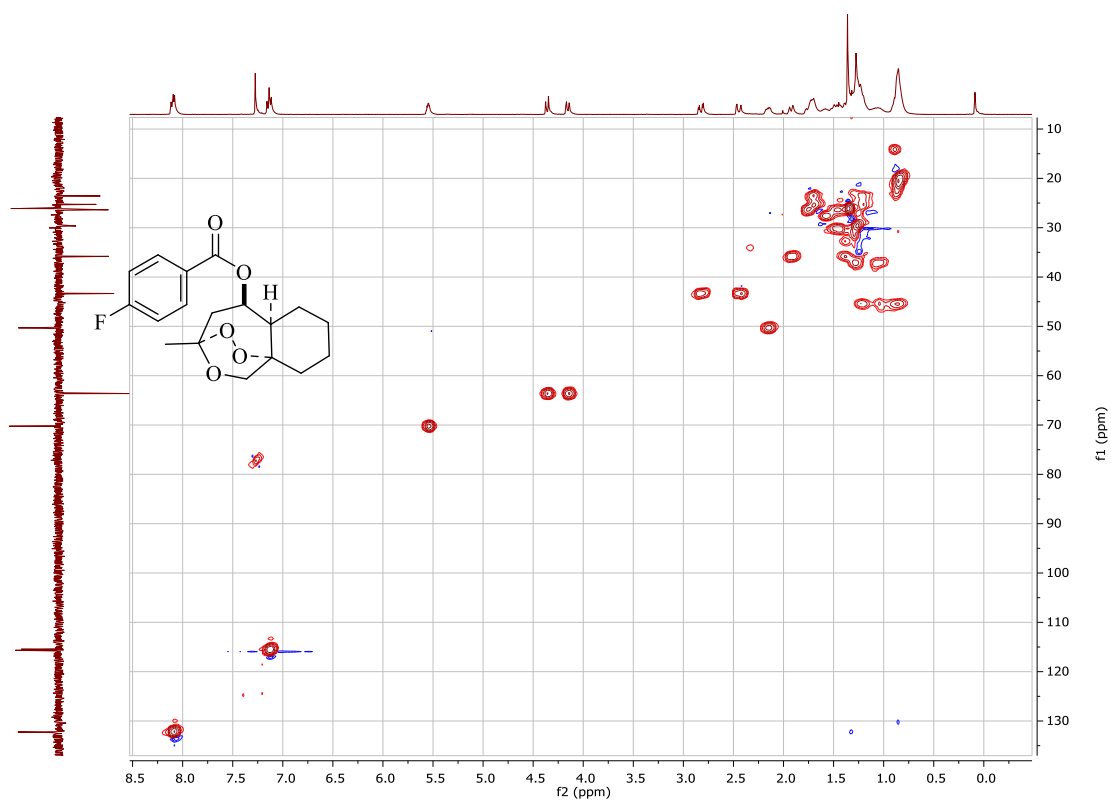

Figure S31. HSQC spectrum of the compound **11**.

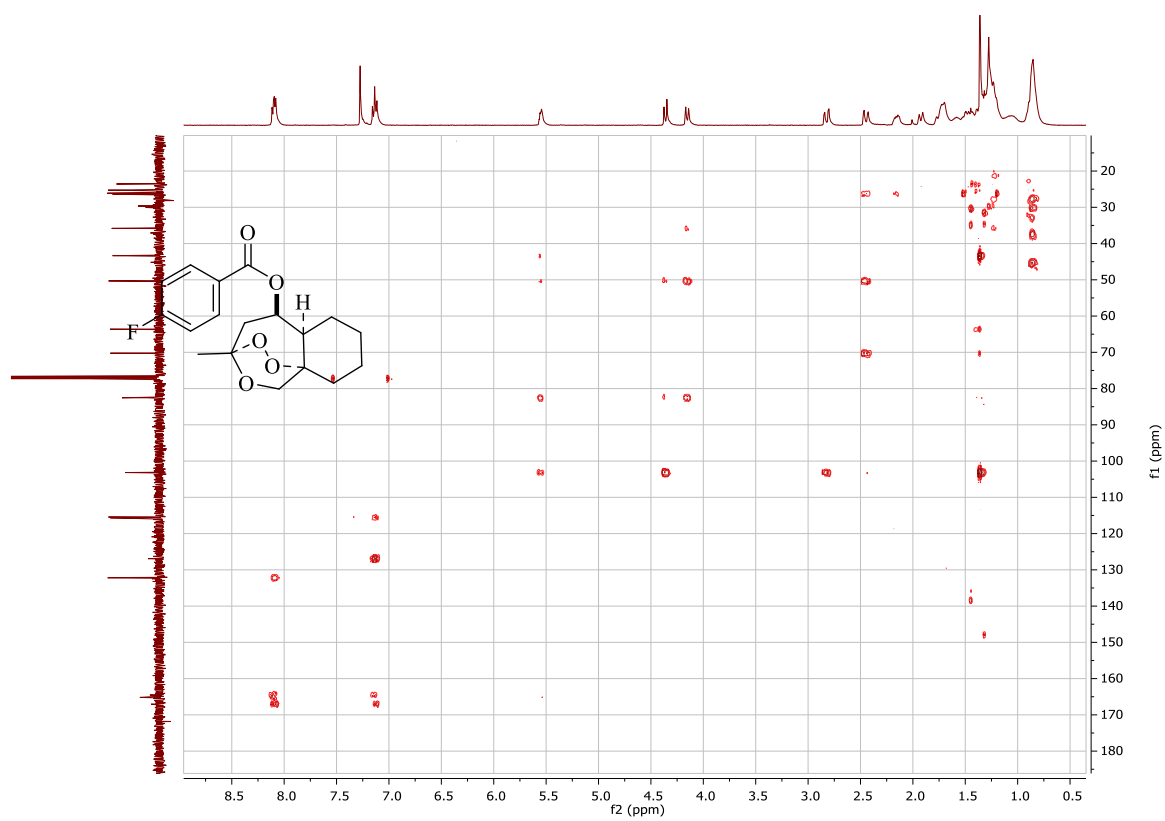

Figure S32. HMBC spectrum of the compound 11.

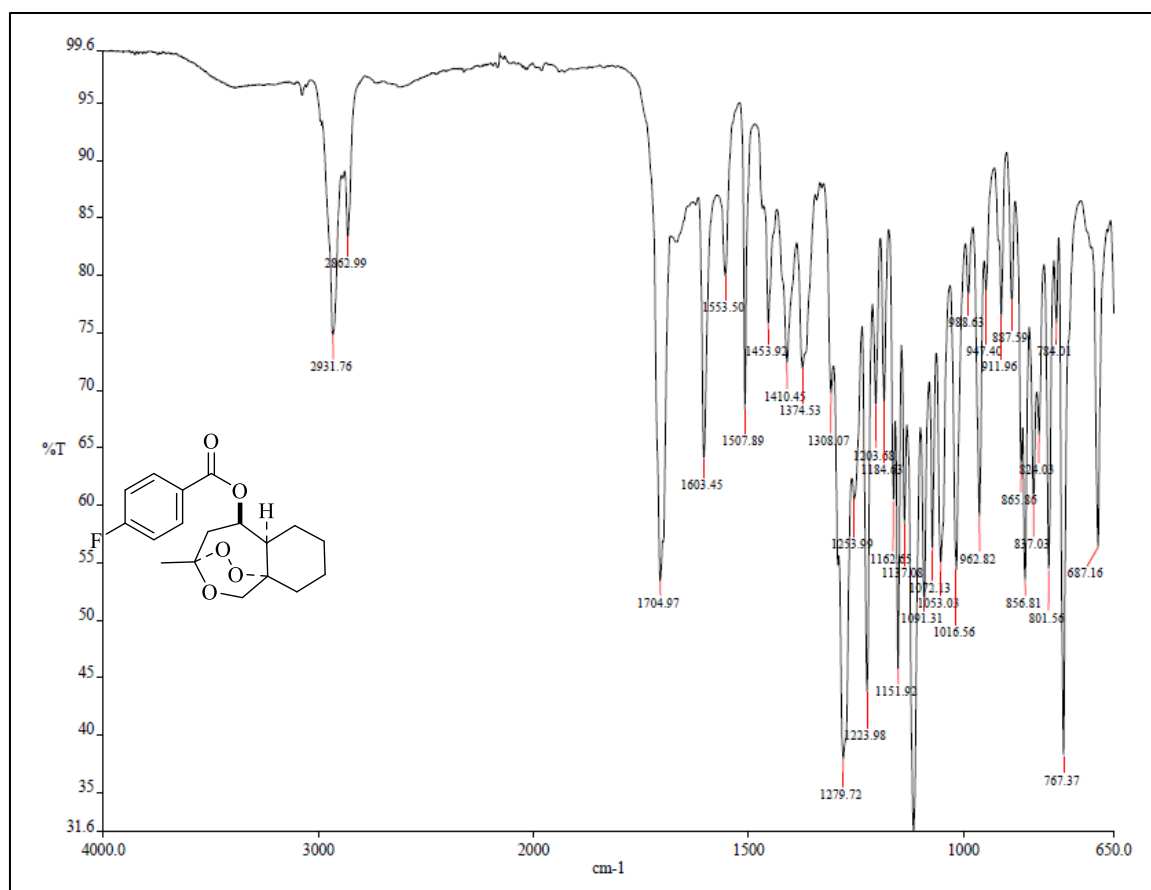

Figure S33. IR-spectrum of the compound **11**.

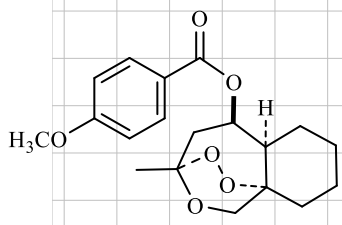

Figure S34.  $^1\text{H}$ -spectrum of the compound **12** ( $\text{CDCl}_3$ , 400 MHz).

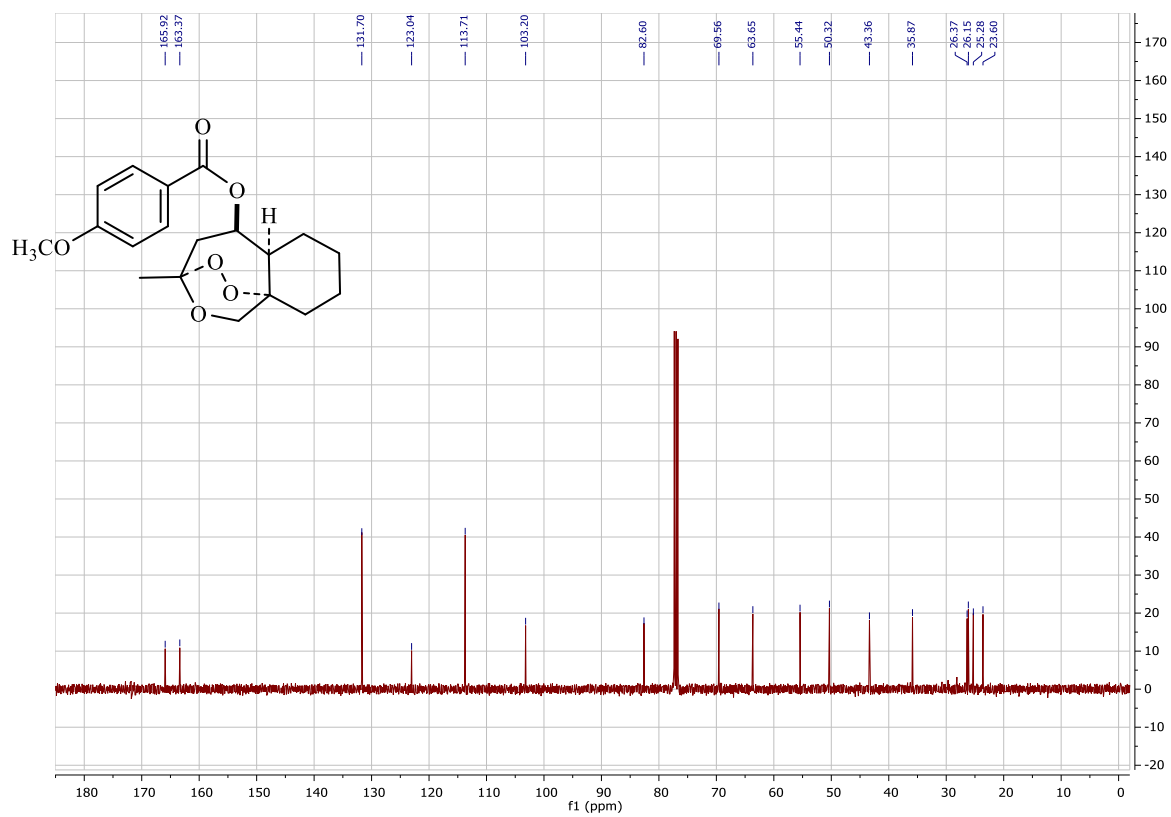

Figure S35. <sup>13</sup>C-NMR spectrum of the compound 12 (CDCl<sub>3</sub>, 100 MHz).



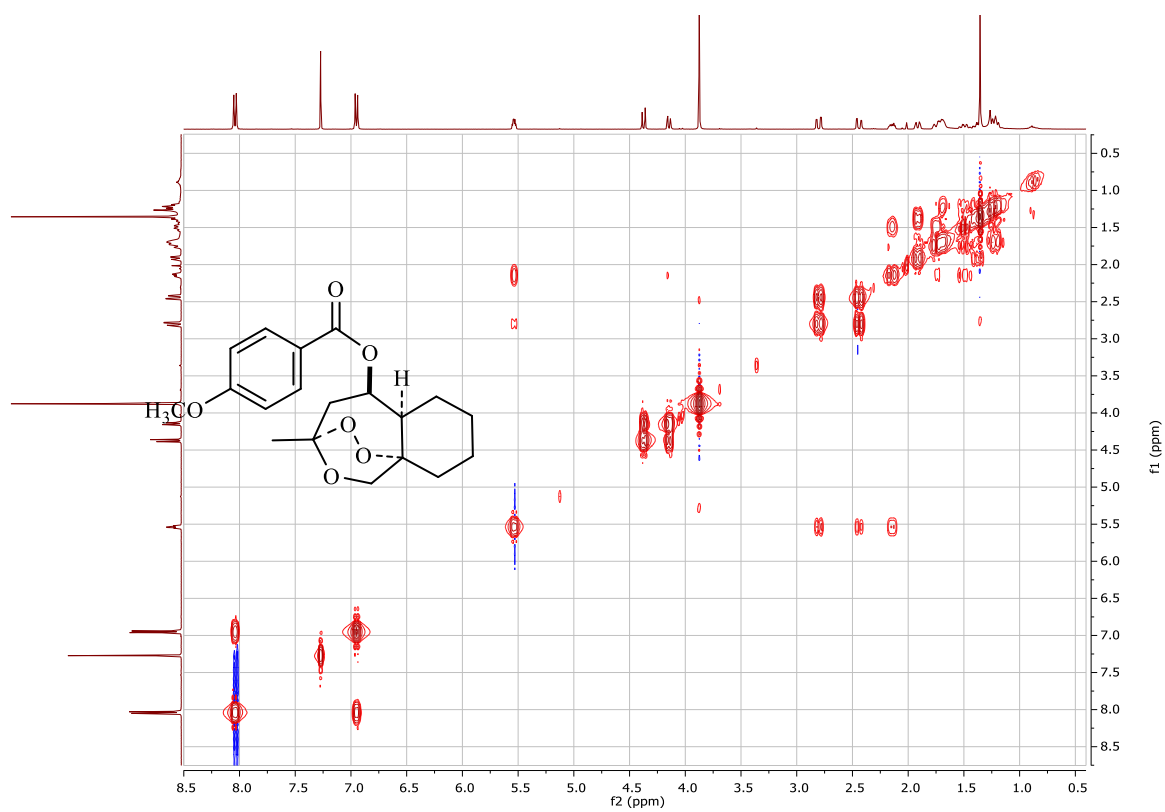

Figure S36. COSY spectrum of the compound **12**.

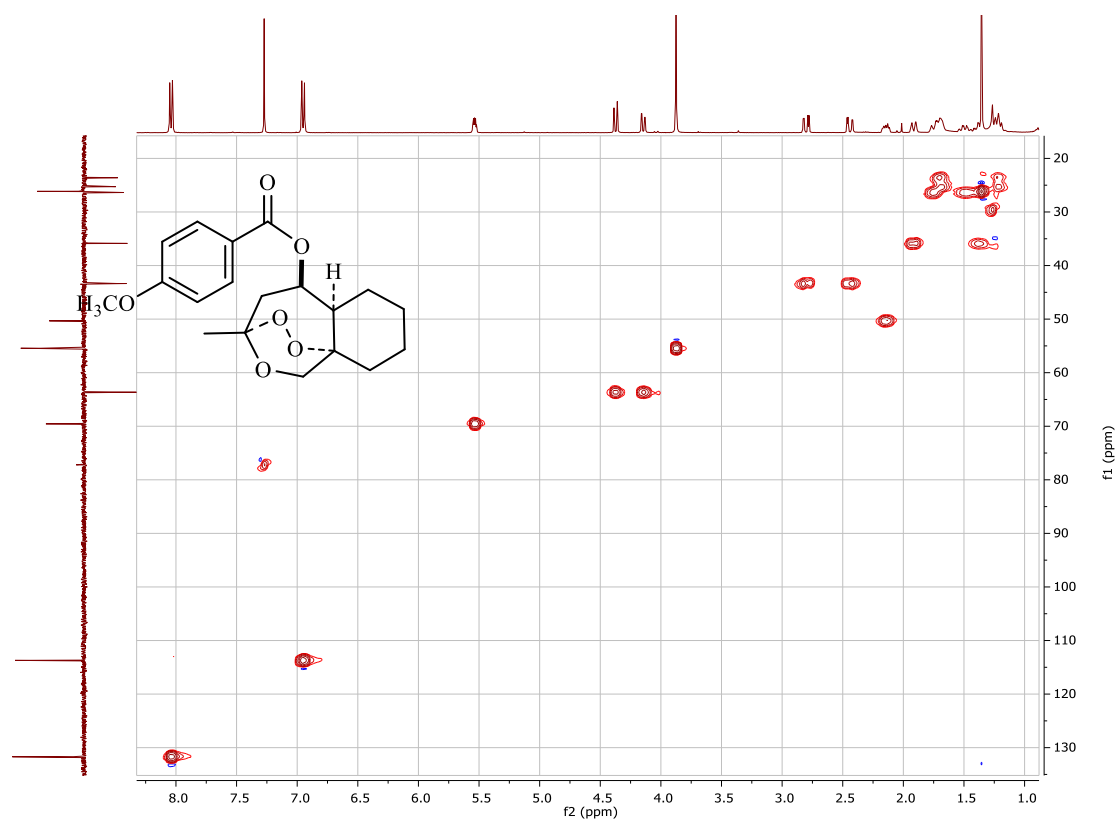

Figure S37. HSQC spectrum of the compound **12**.

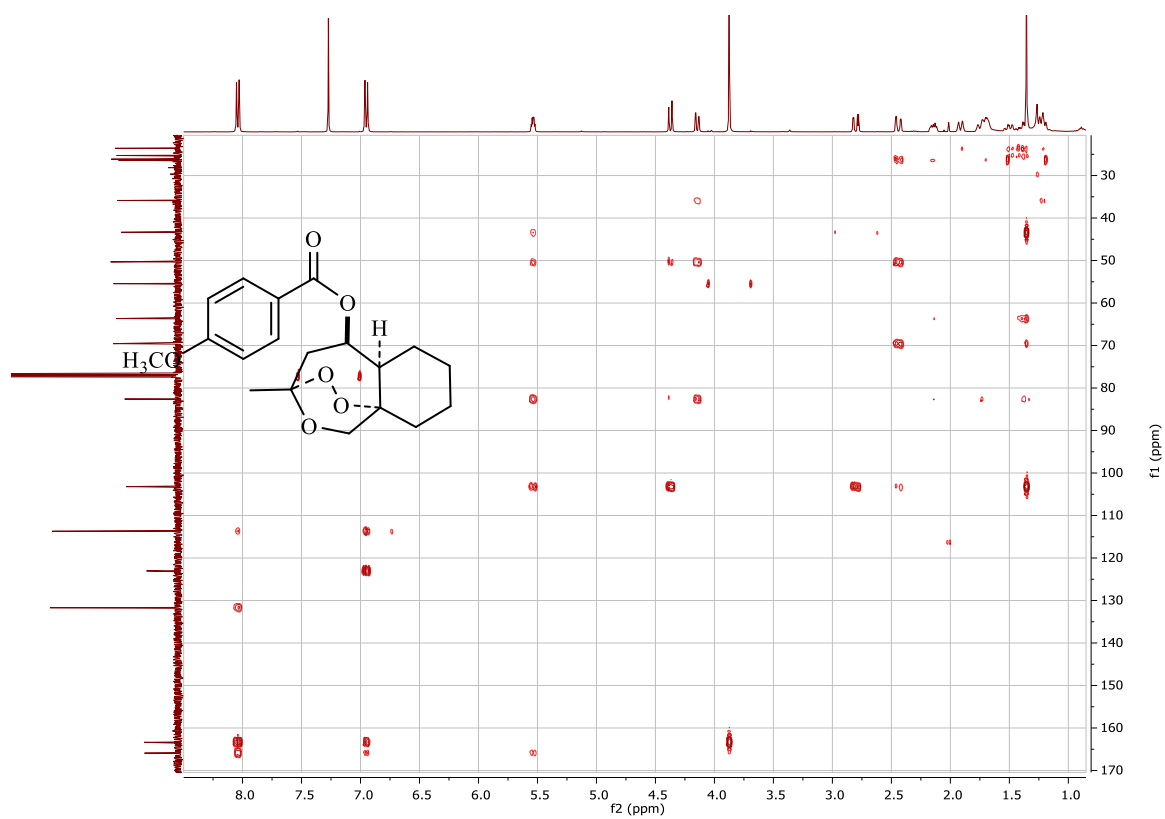

Figure S38. HMBC spectrum of the compound 12.

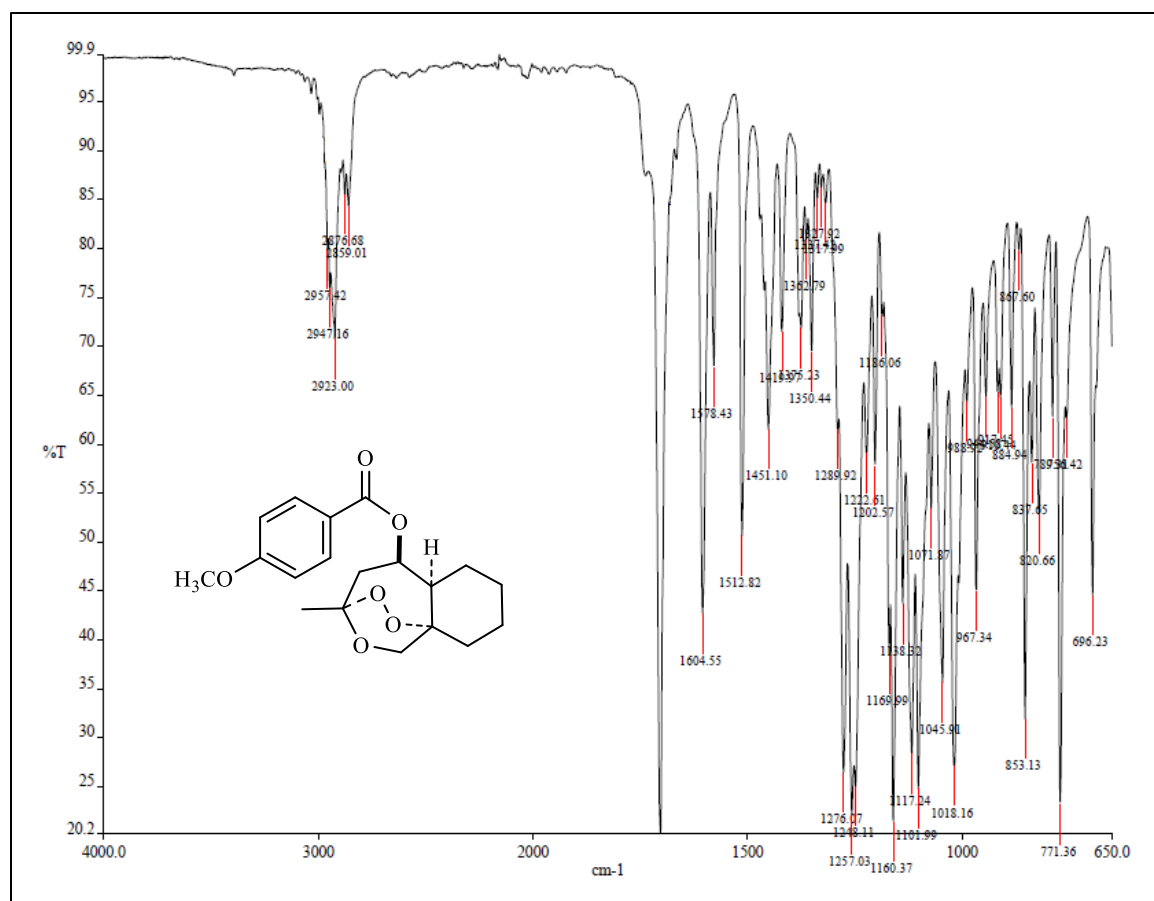

Figure S39. IR-spectrum of the compound **12**.

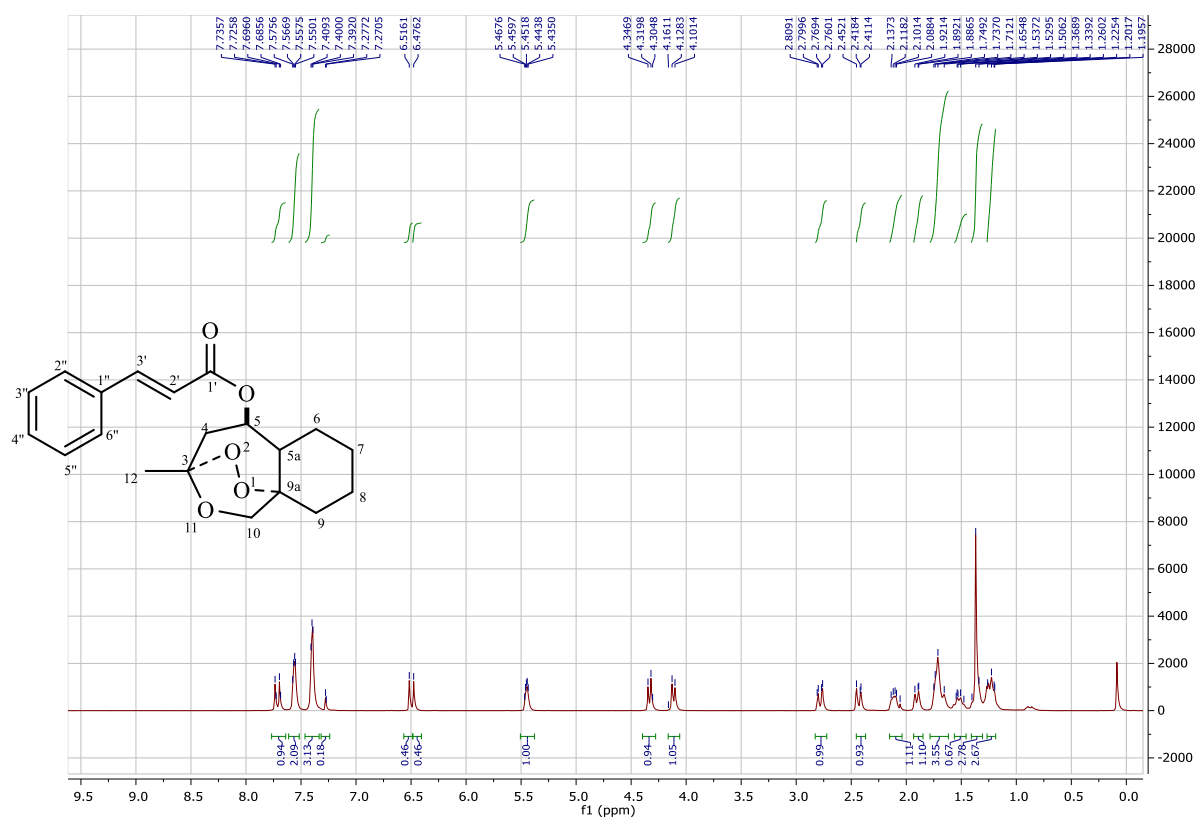

Figure S40.  $^1\text{H}$ -spectrum of the compound **13** ( $\text{CDCl}_3$ , 400 MHz).

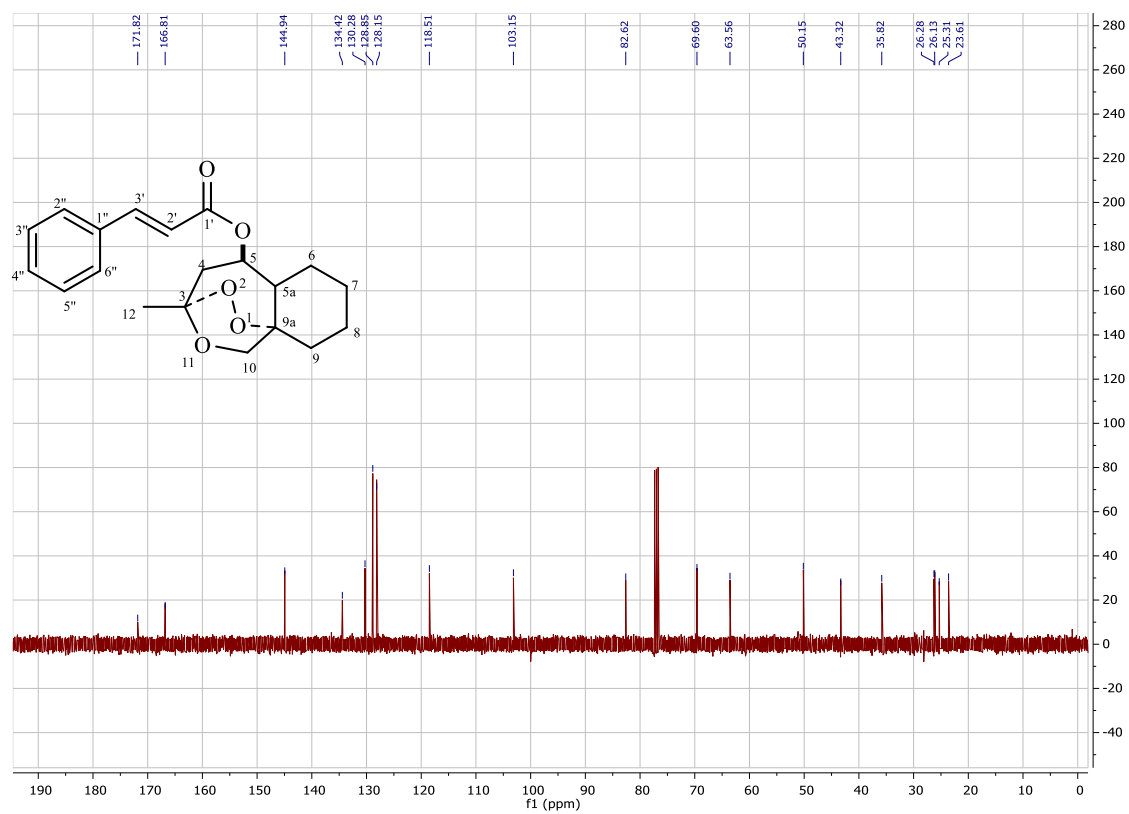

Figure S41.  $^{13}\text{C}$ -NMR spectrum of the compound **13** ( $\text{CDCl}_3$ , 100 MHz).

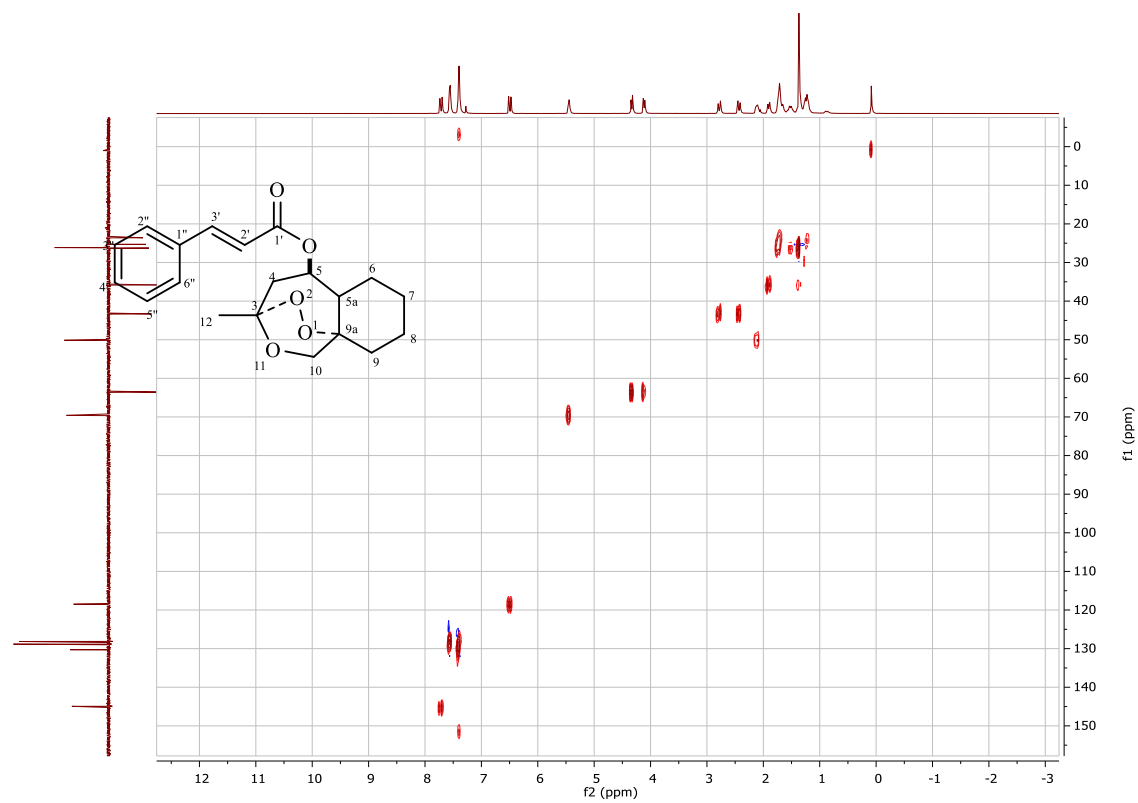

Figure S42. HSQC spectrum of the compound **13**.

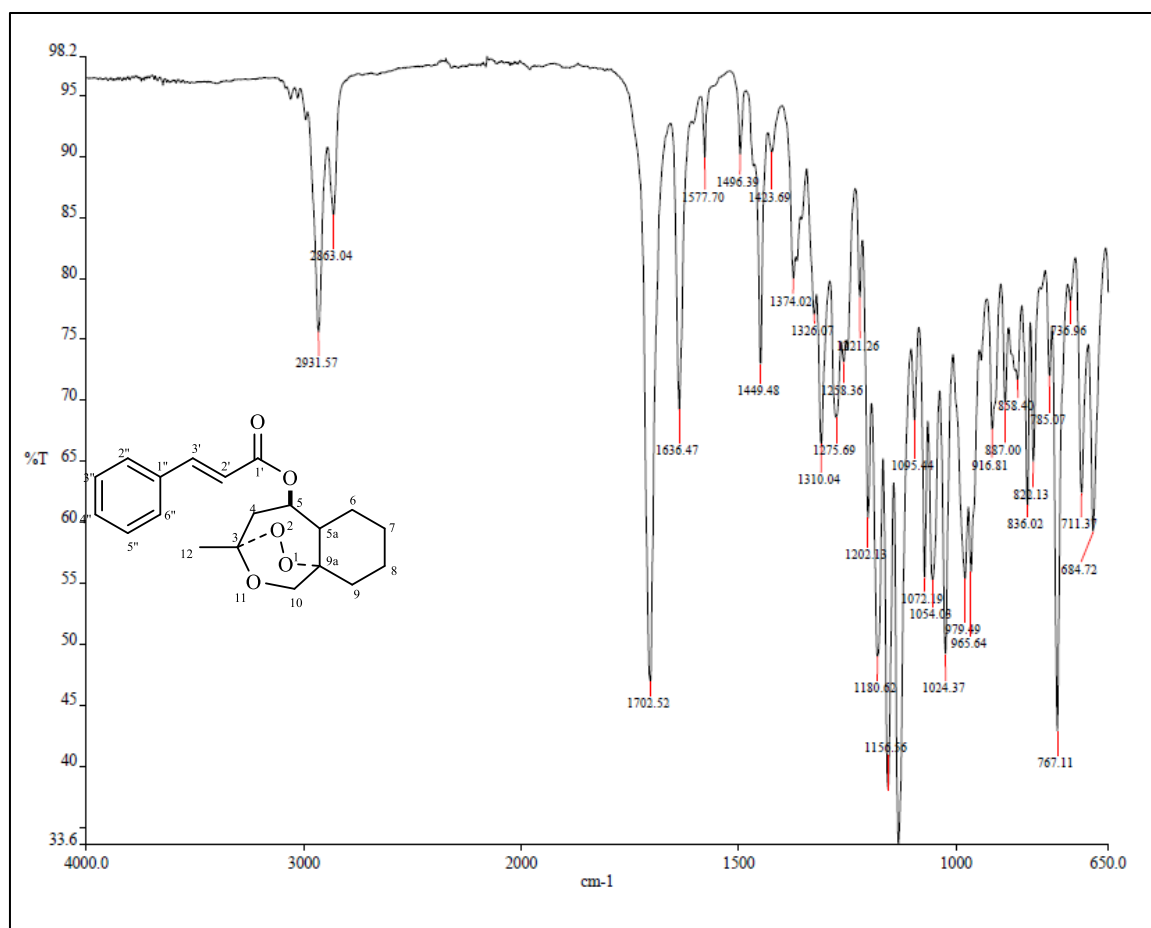

Figure S43. IR-spectrum of the compound 13.



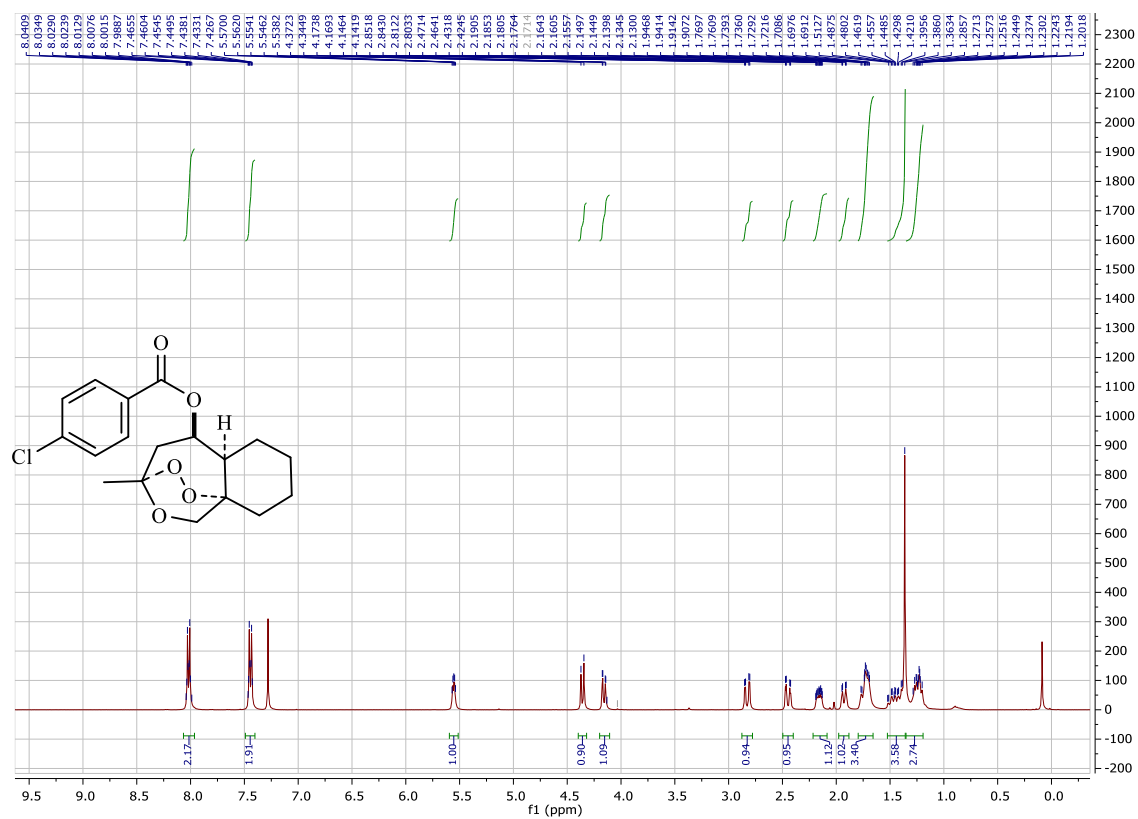

Figure S44. <sup>1</sup>H-spectrum of the compound **14** (CDCl<sub>3</sub>, 400 MHz).

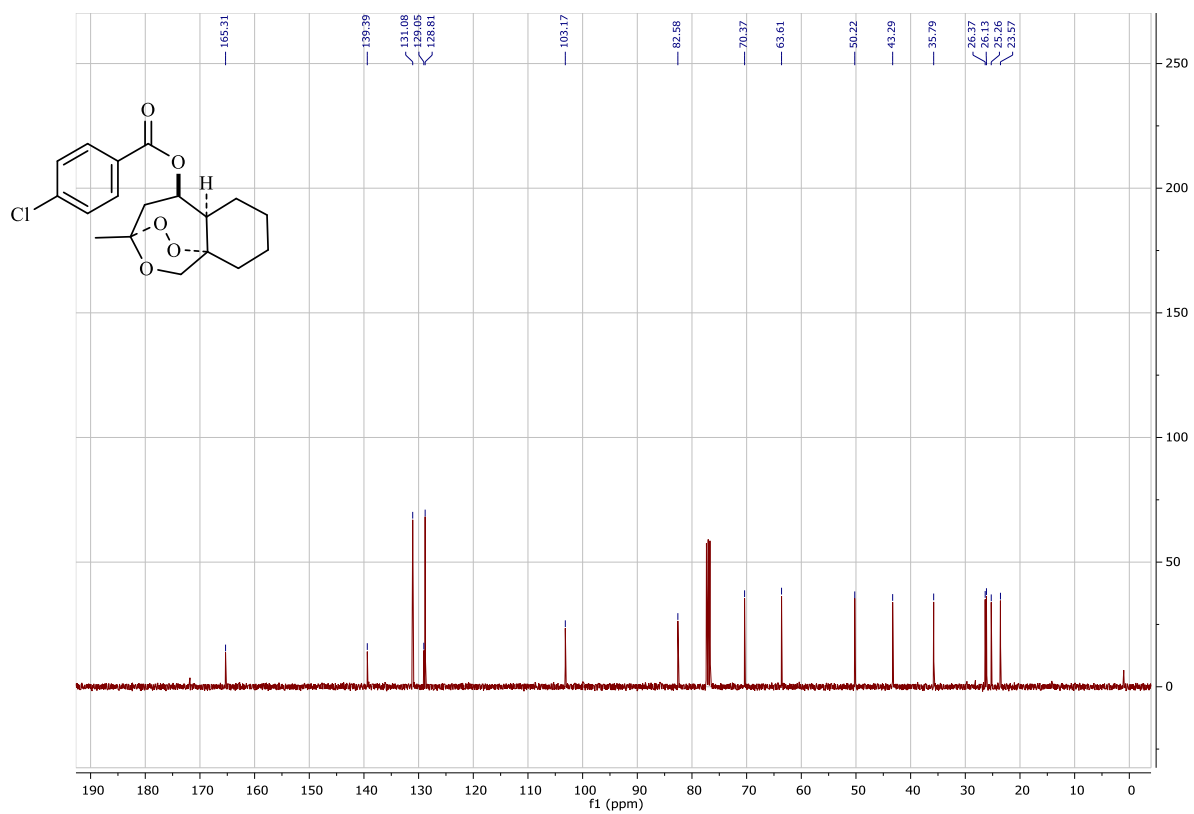

Figure S45.  $^{13}\text{C}$ -NMR spectrum of the compound **14** (CDCl<sub>3</sub>, 100 MHz).

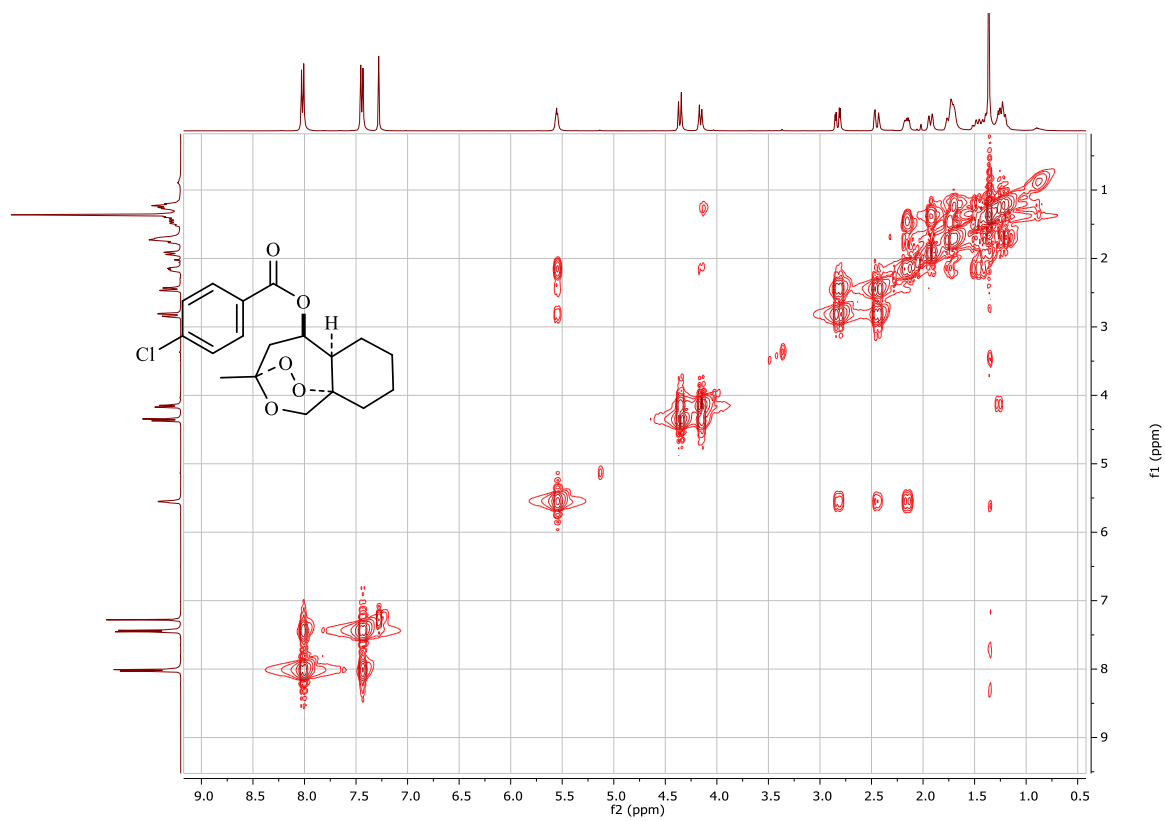

Figure S46. COSY spectrum of the compound **14**.

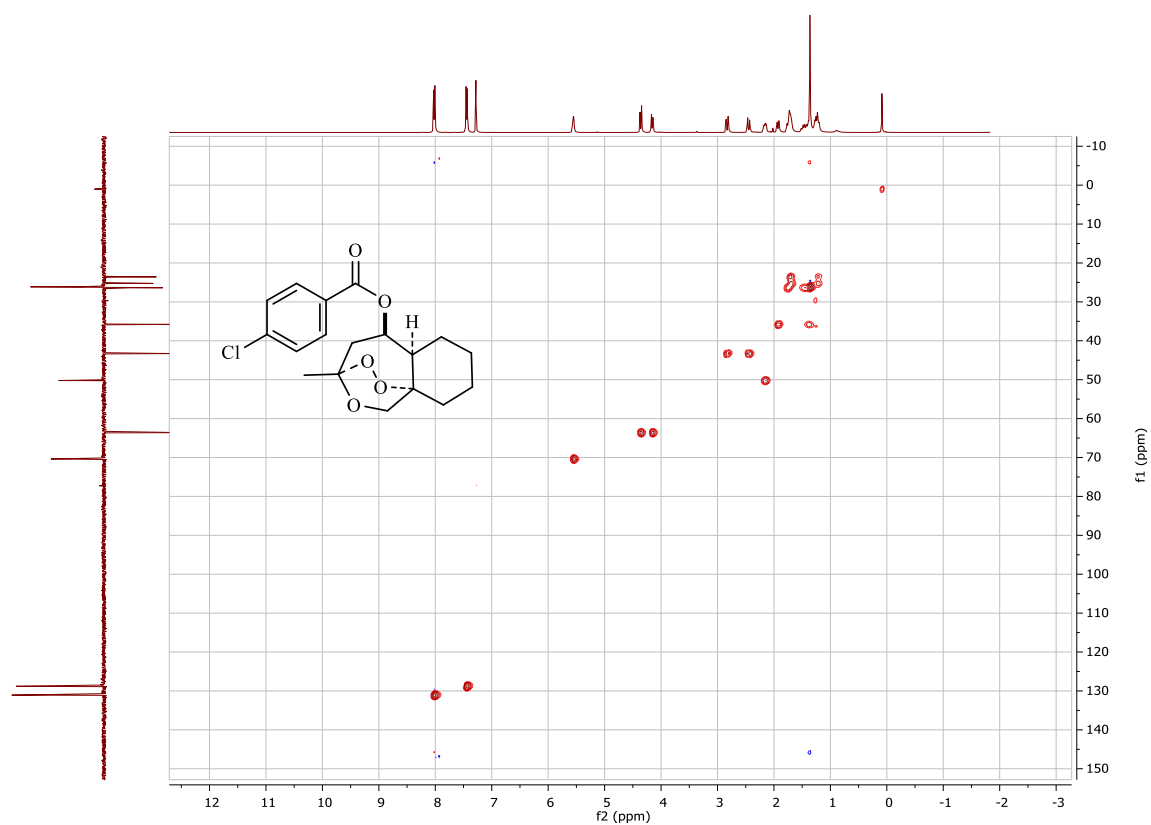

S47. HSQC spectrum of the compound **14**.

Figure

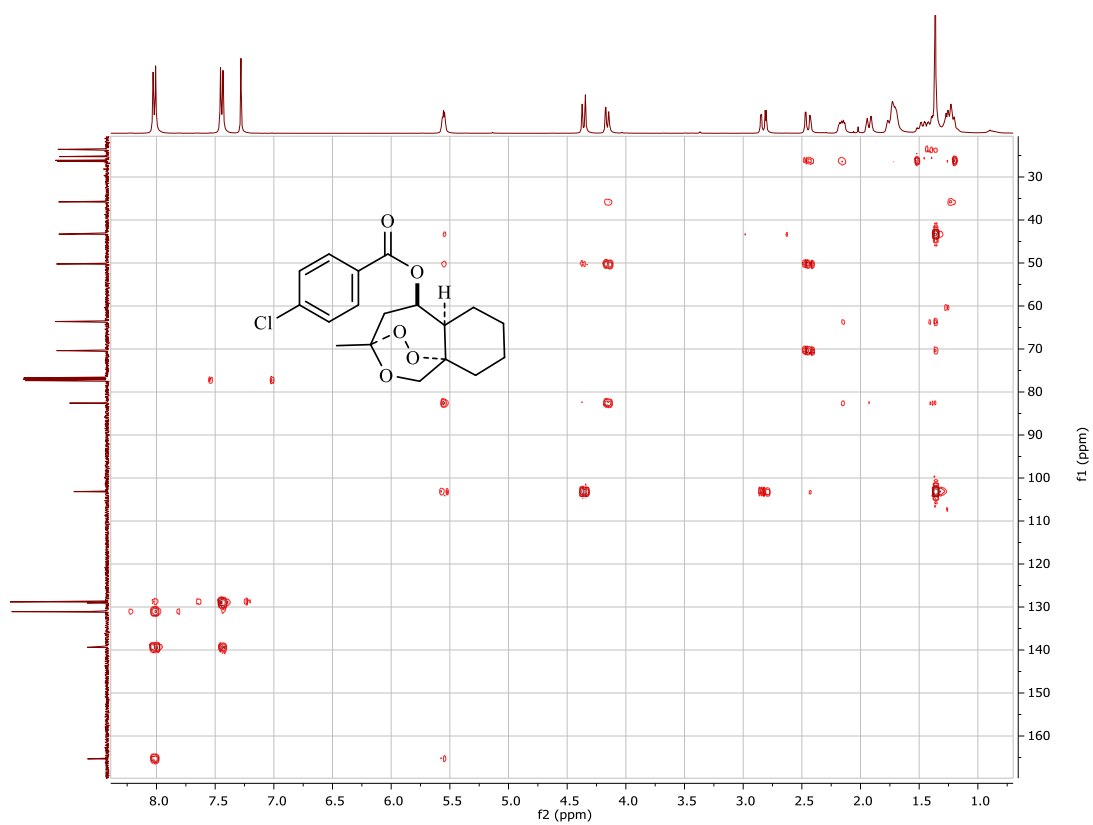

HMBC spectrum of the compound 14.

Figure S48.

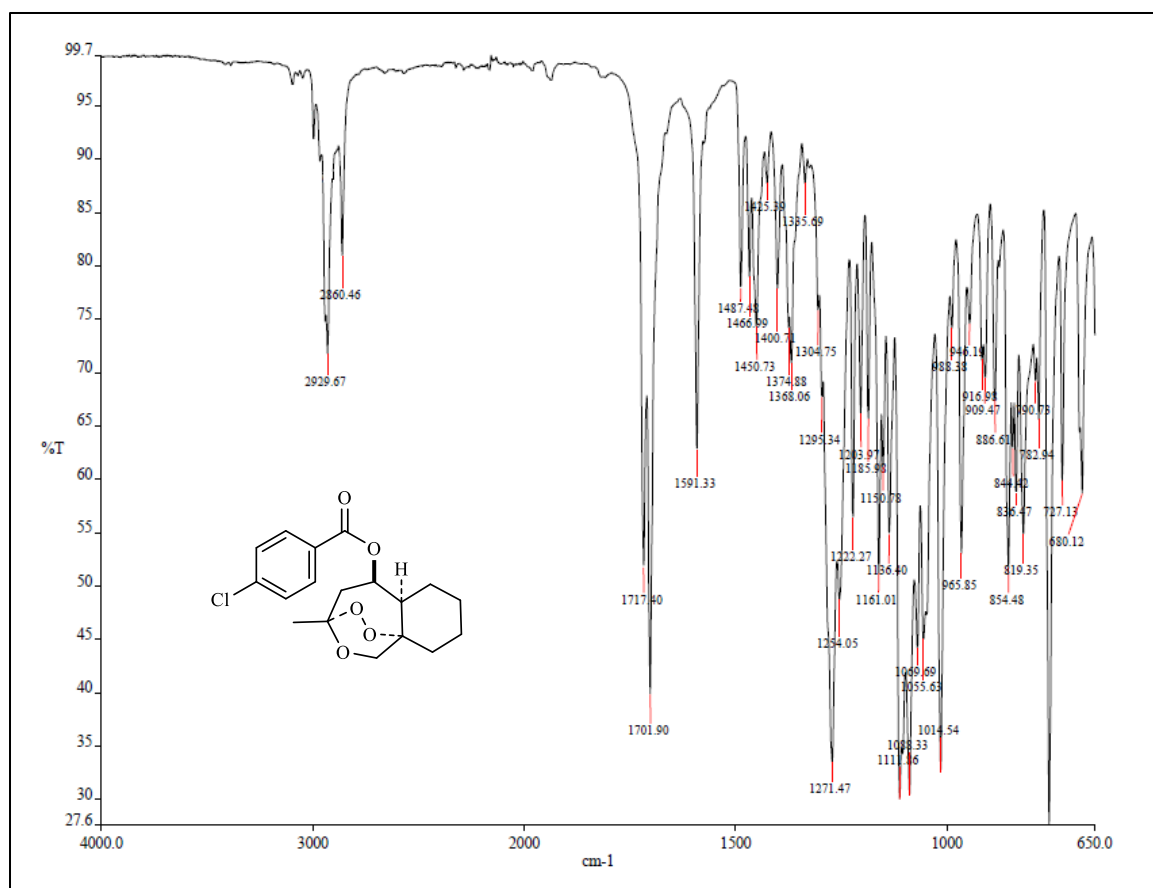

Figure S49. IR-spectrum of the compound **14**.

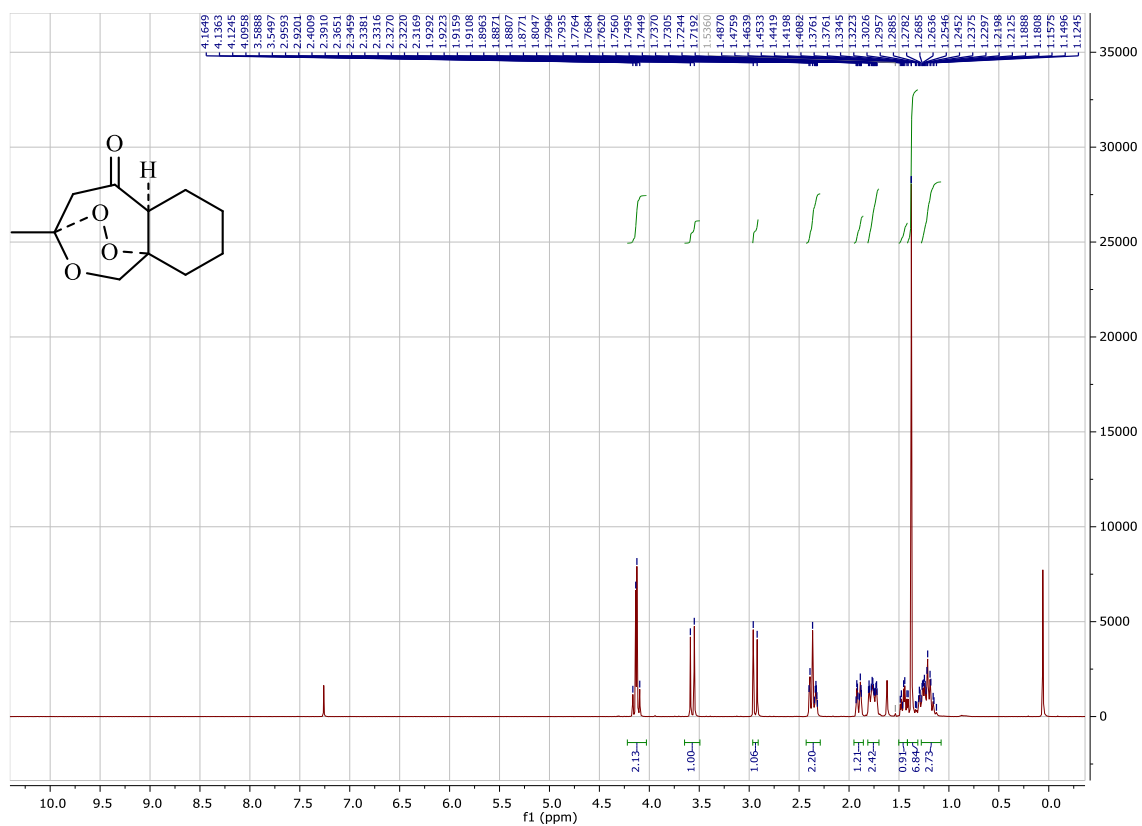

Figure S50. <sup>1</sup>H-spectrum of the compound **15** (CDCl<sub>3</sub>, 400 MHz).

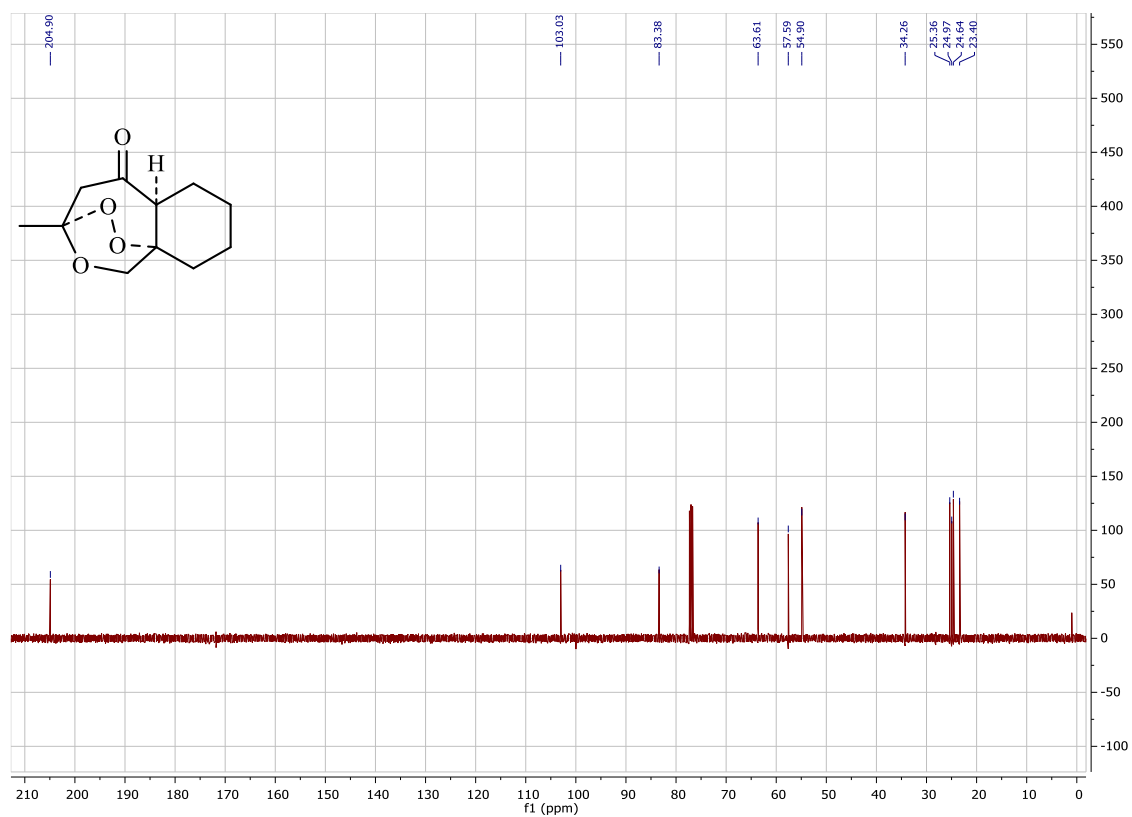

Figure S51.  $^{13}\text{C}$ -NMR spectrum of the compound **15** ( $\text{CDCl}_3$ , 100 MHz).



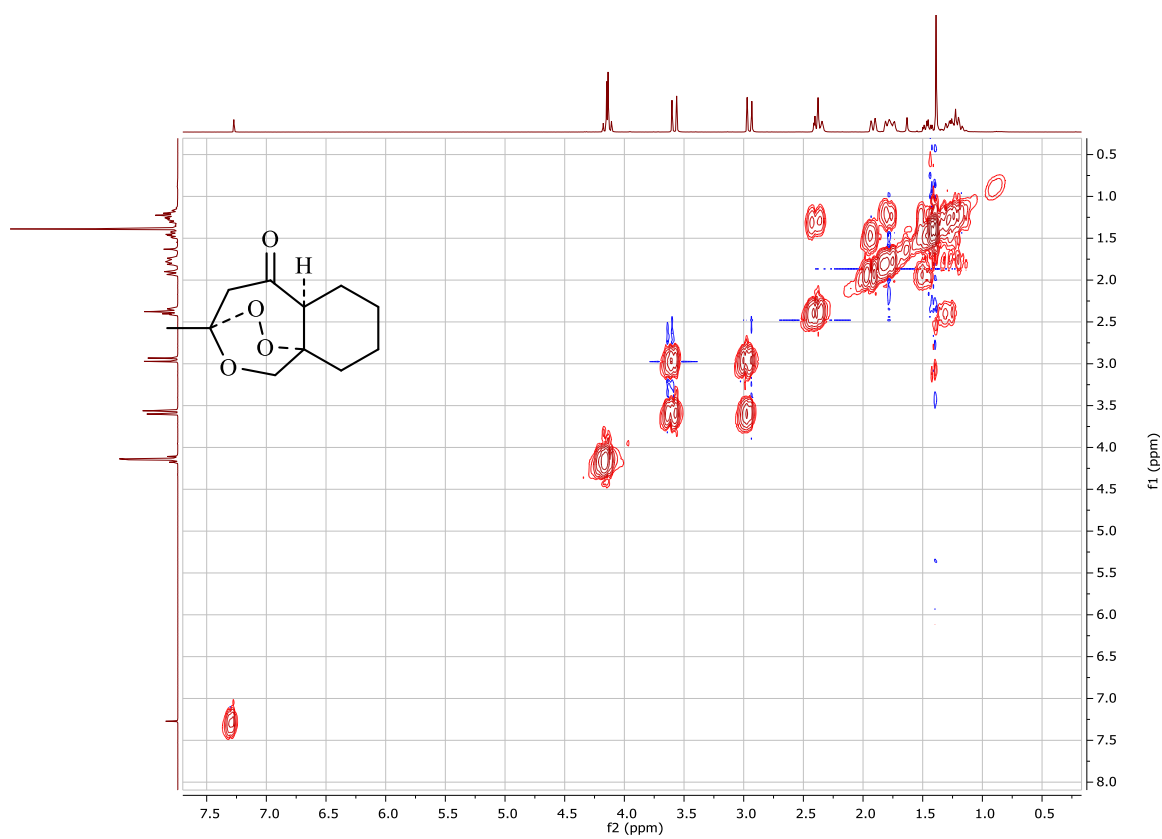

Figure S52. COSY spectrum of the compound **15**.

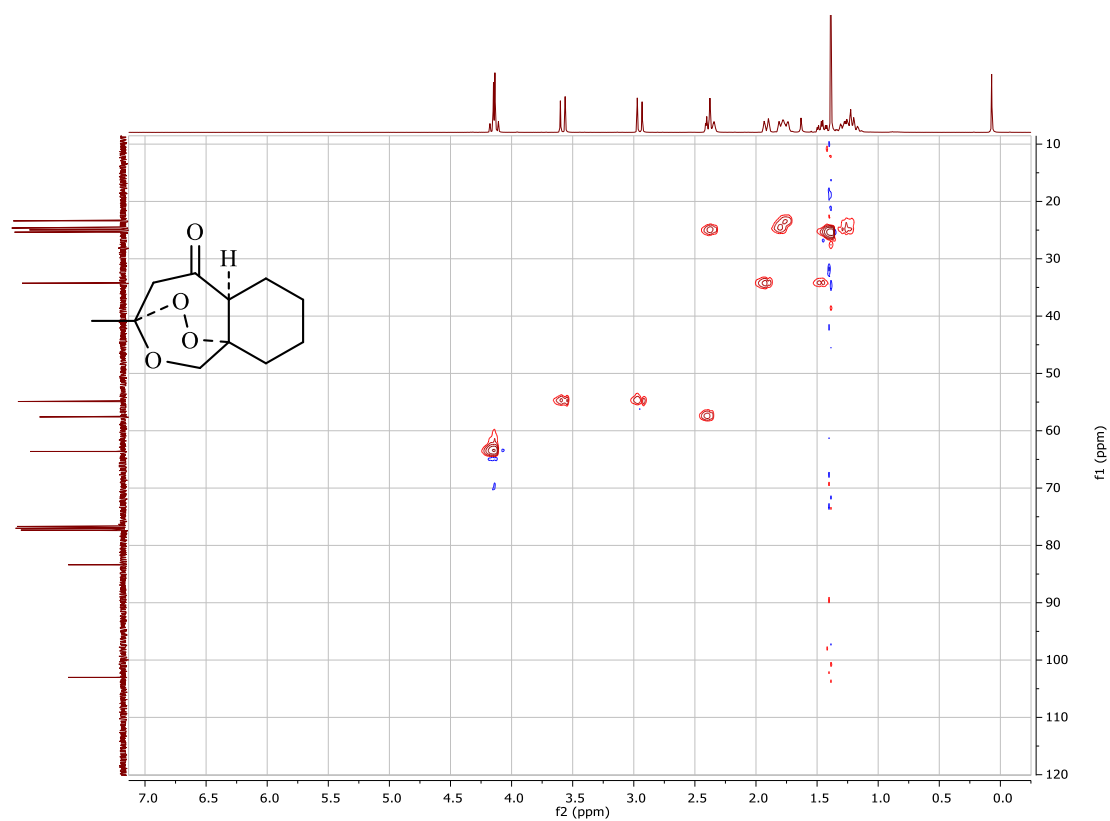

Figure S53. HSQC spectrum of the compound **15**.

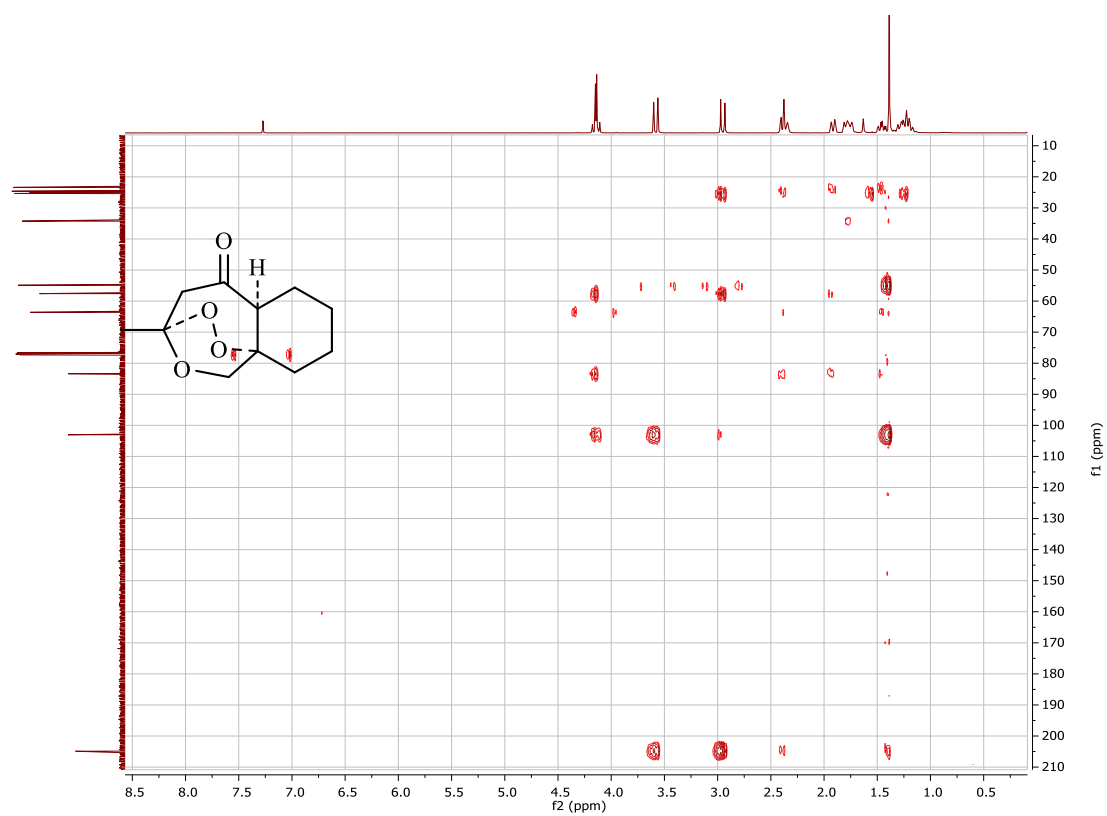

Figure S54. HMBC spectrum of the compound **15**.

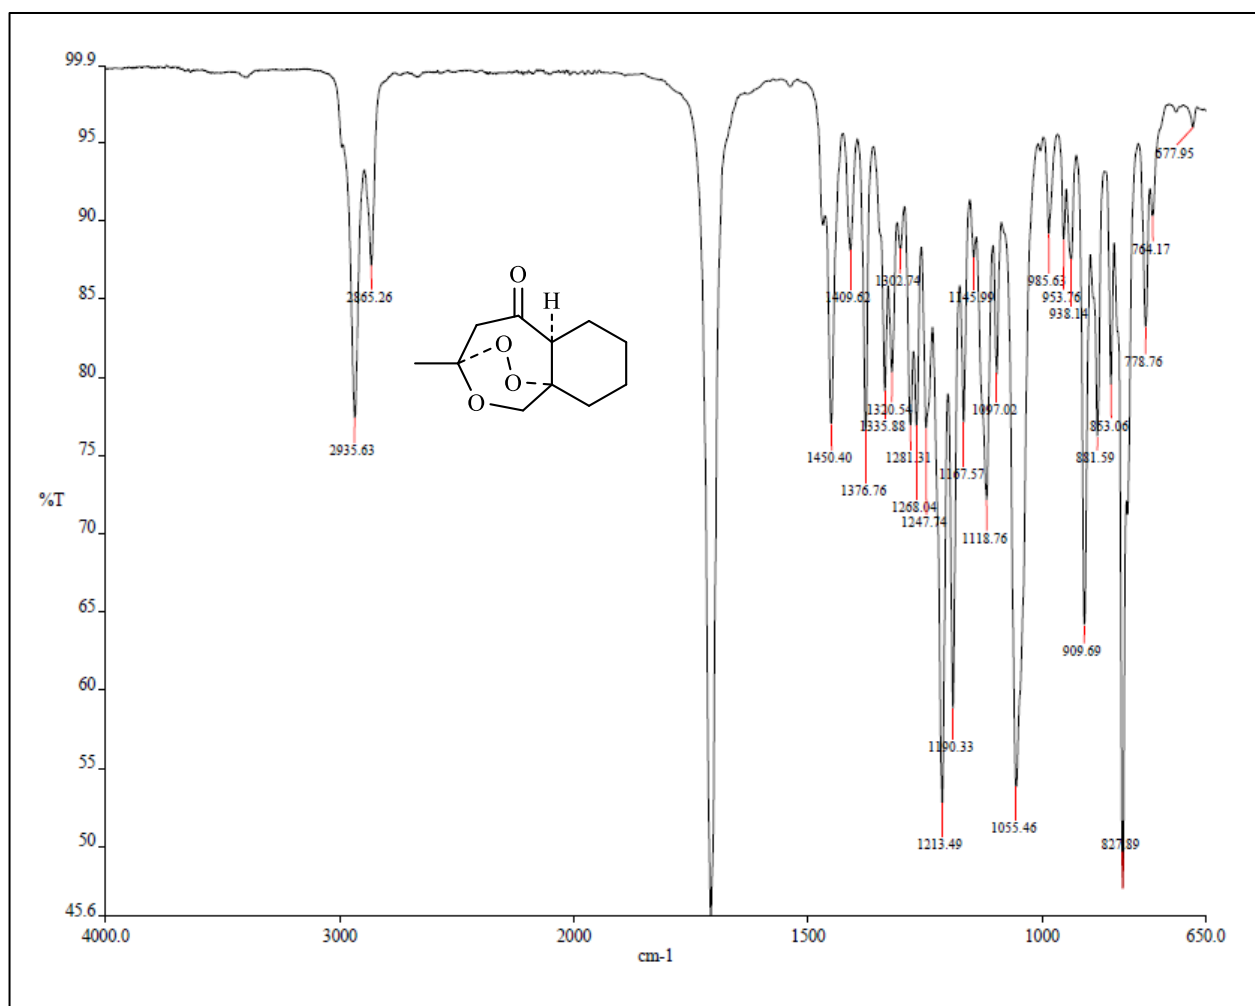

IR-spectrum of the compound 15.

Figure S55.

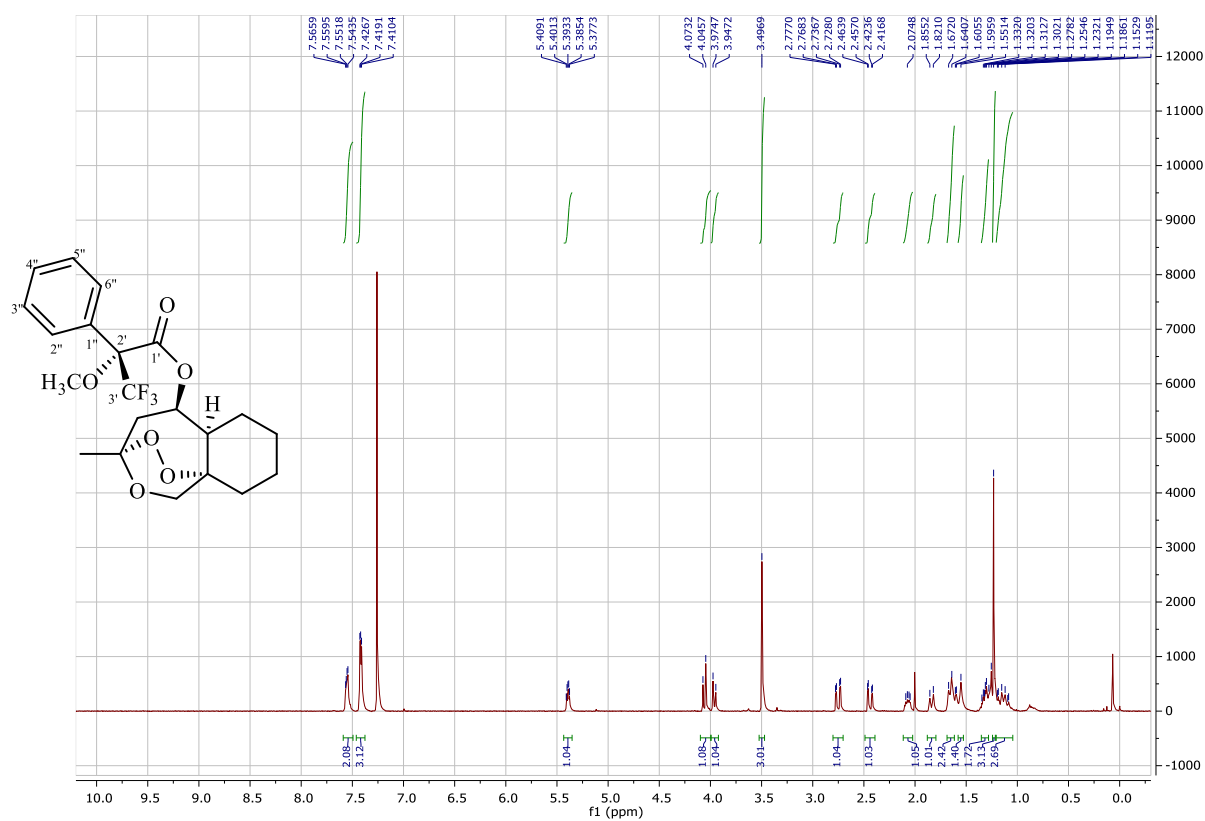

Figure S56. <sup>1</sup>H-spectrum of the compound **19a** (CDCl<sub>3</sub>, 400 MHz).

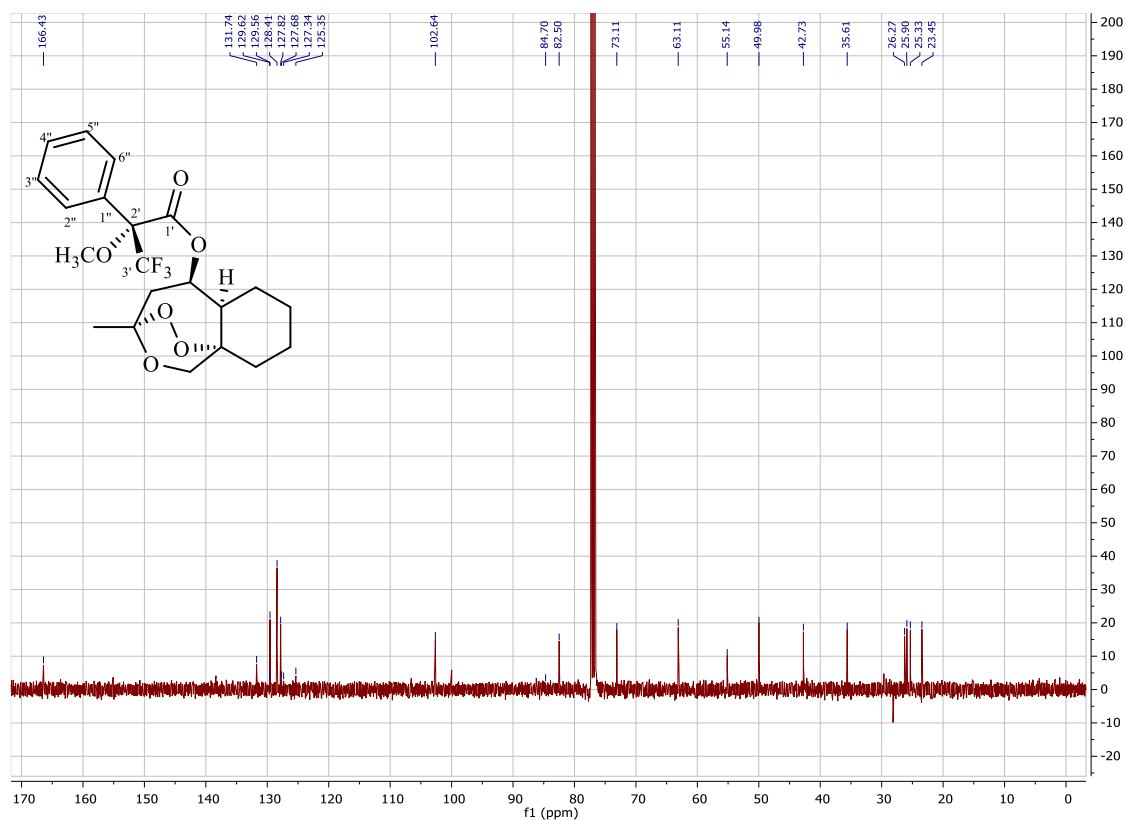

Figure S57.  $^{13}\text{C}$ -NMR spectrum of the compound **19a** (CDCl<sub>3</sub>, 100 MHz).

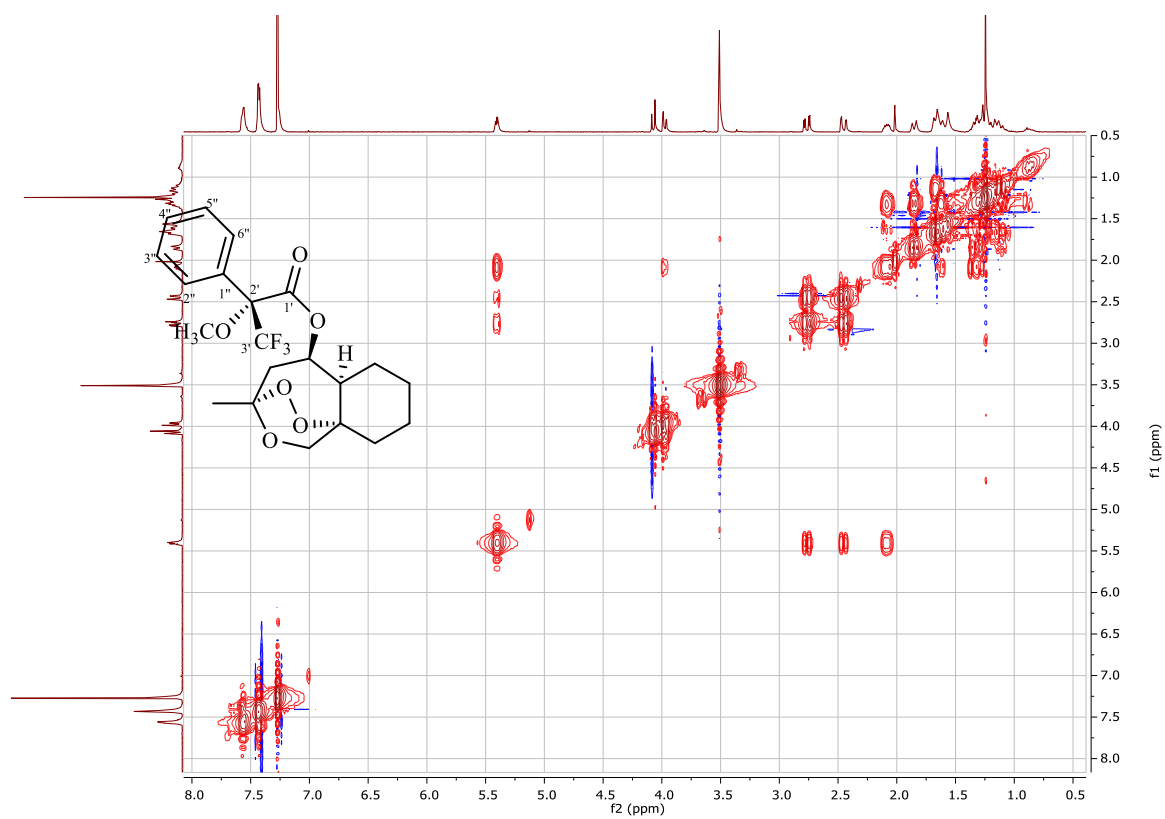

Figure S58. COSY spectrum of the compound **19a**.

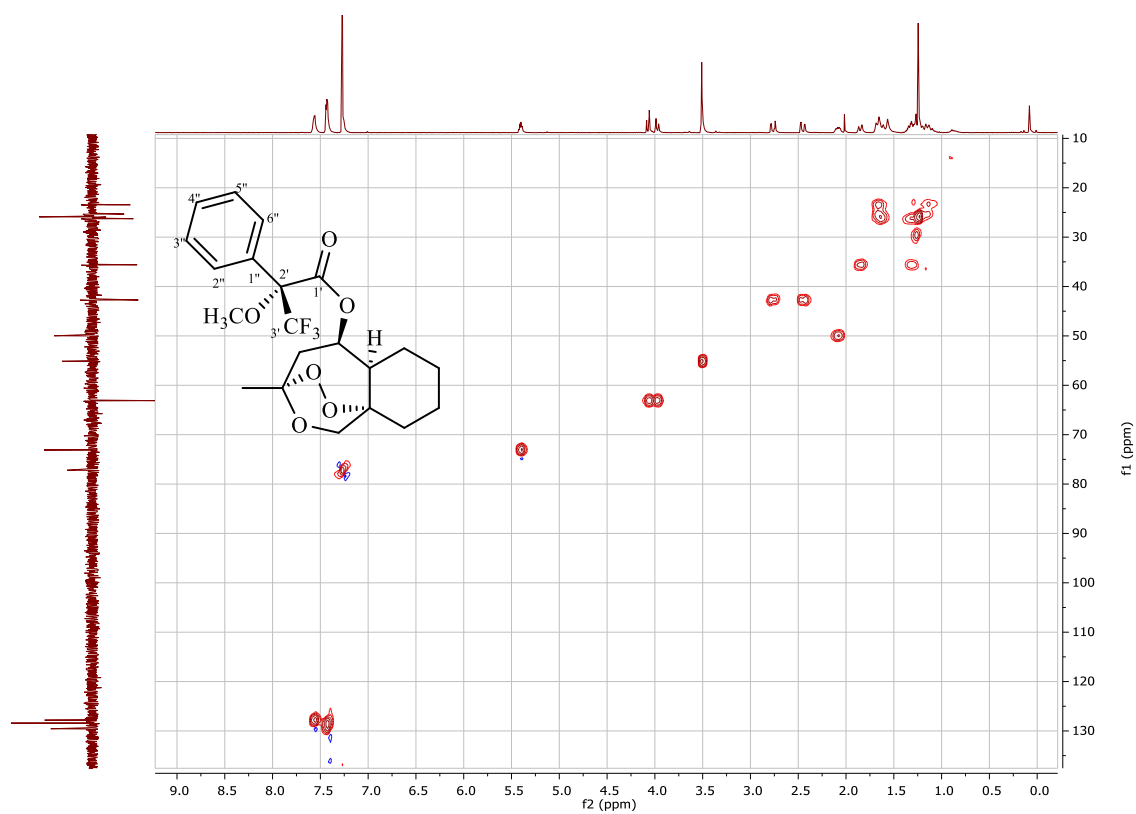

Figure S59. HSQC spectrum of the compound **19a**.



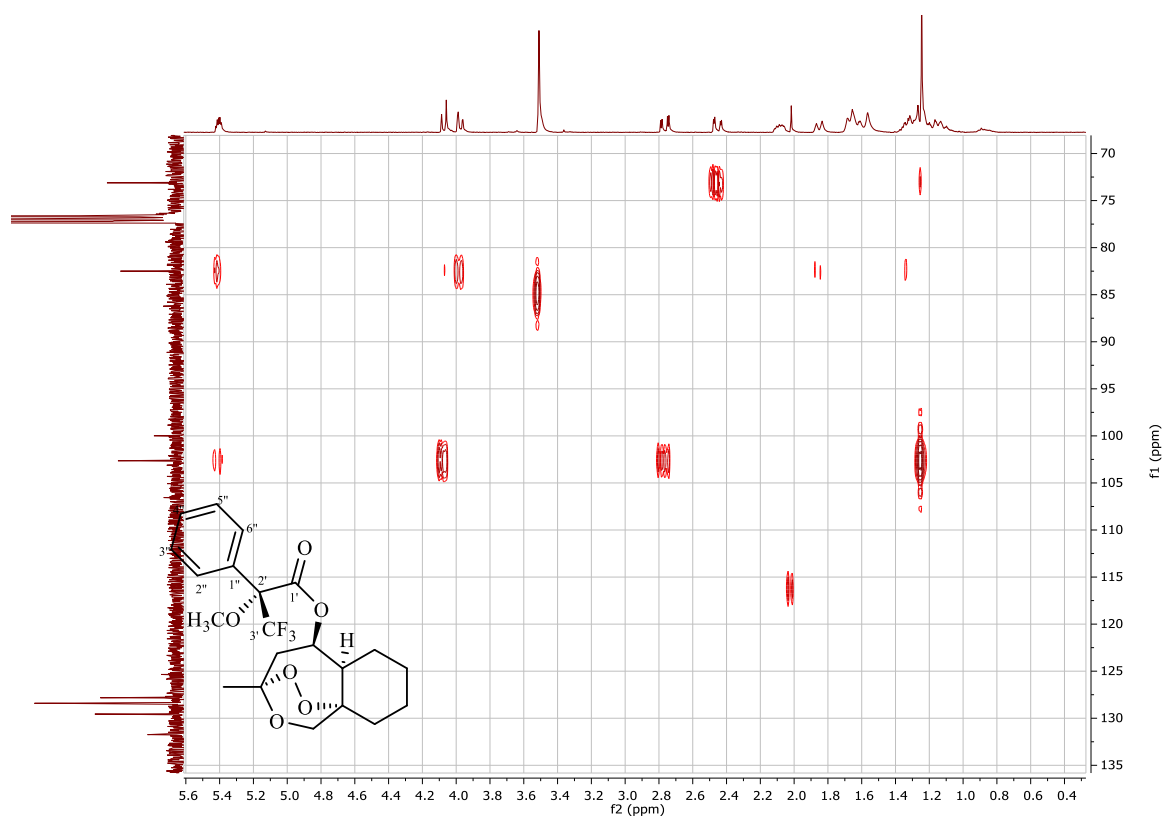

Figure S60. HMBC spectrum of the compound **19a**.

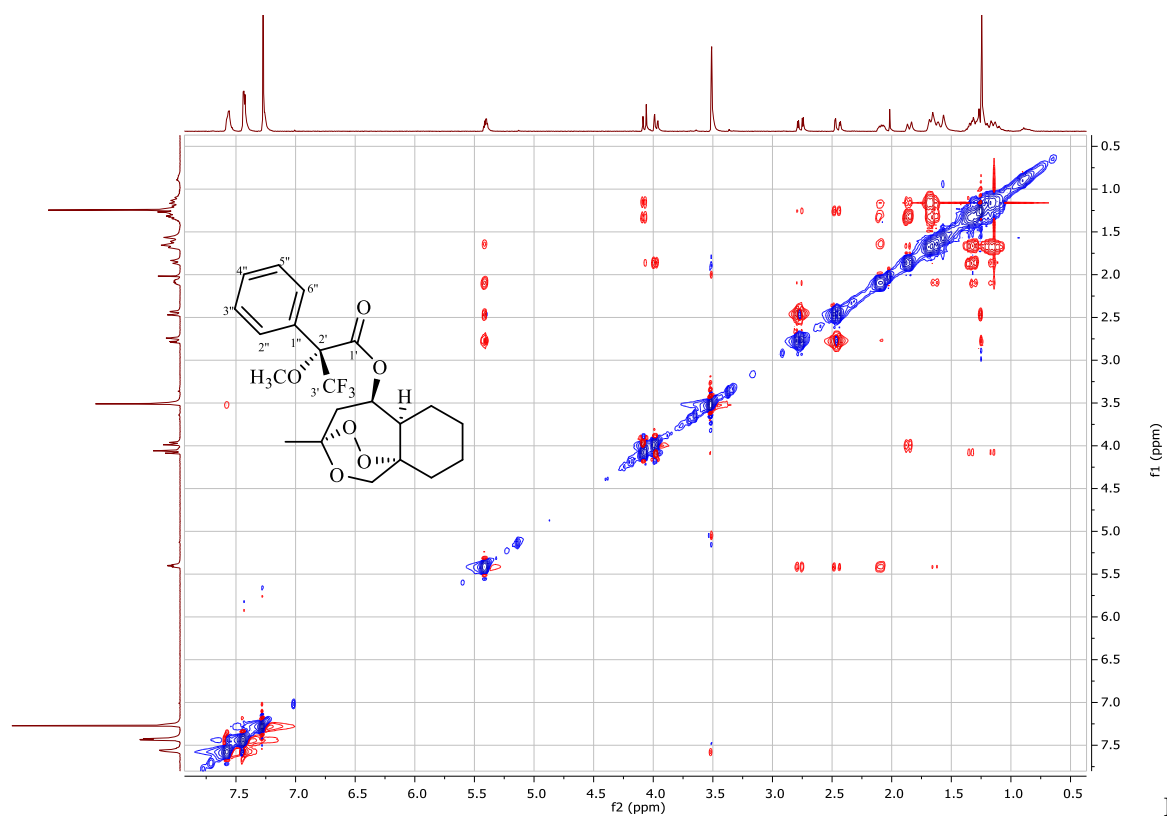

ESY spectrum of the compound **19a**.

Figure S61. NO-

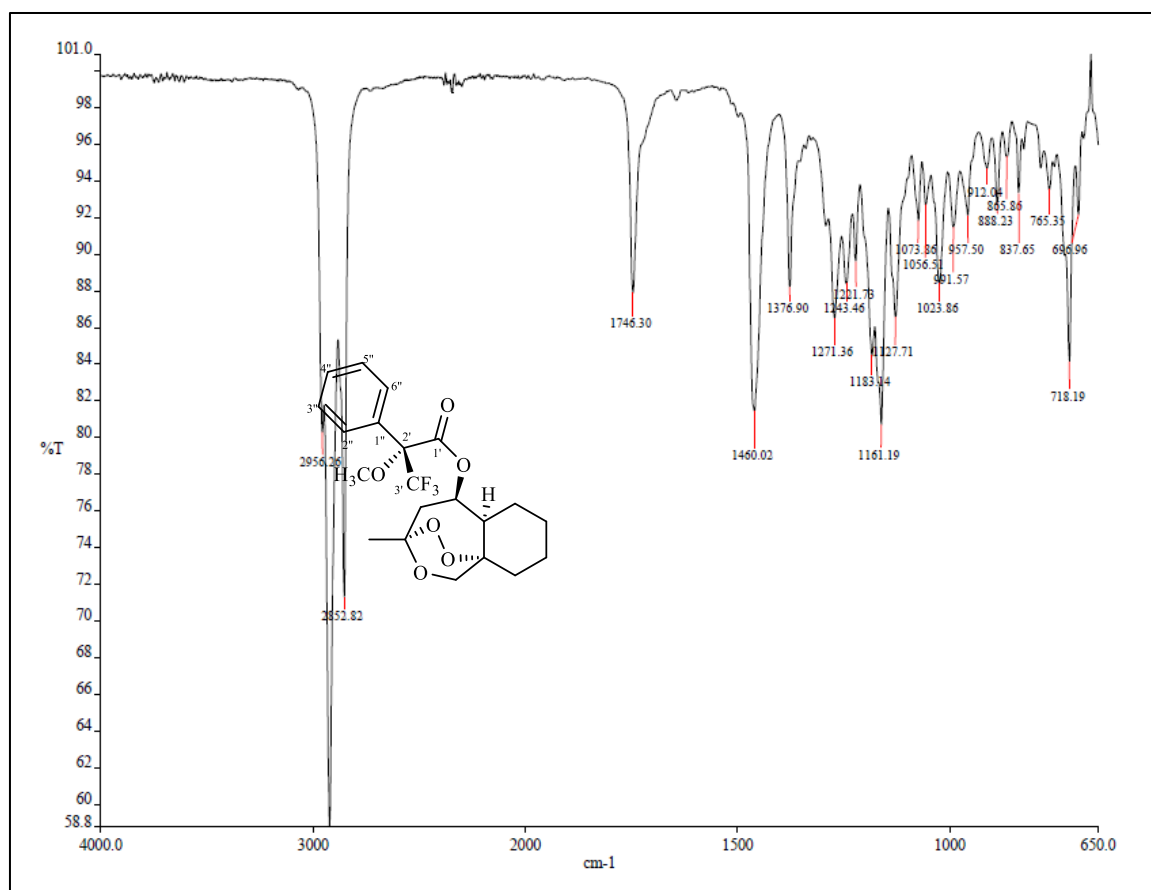

Figure S62. IR-spectrum of the compound **19a**.

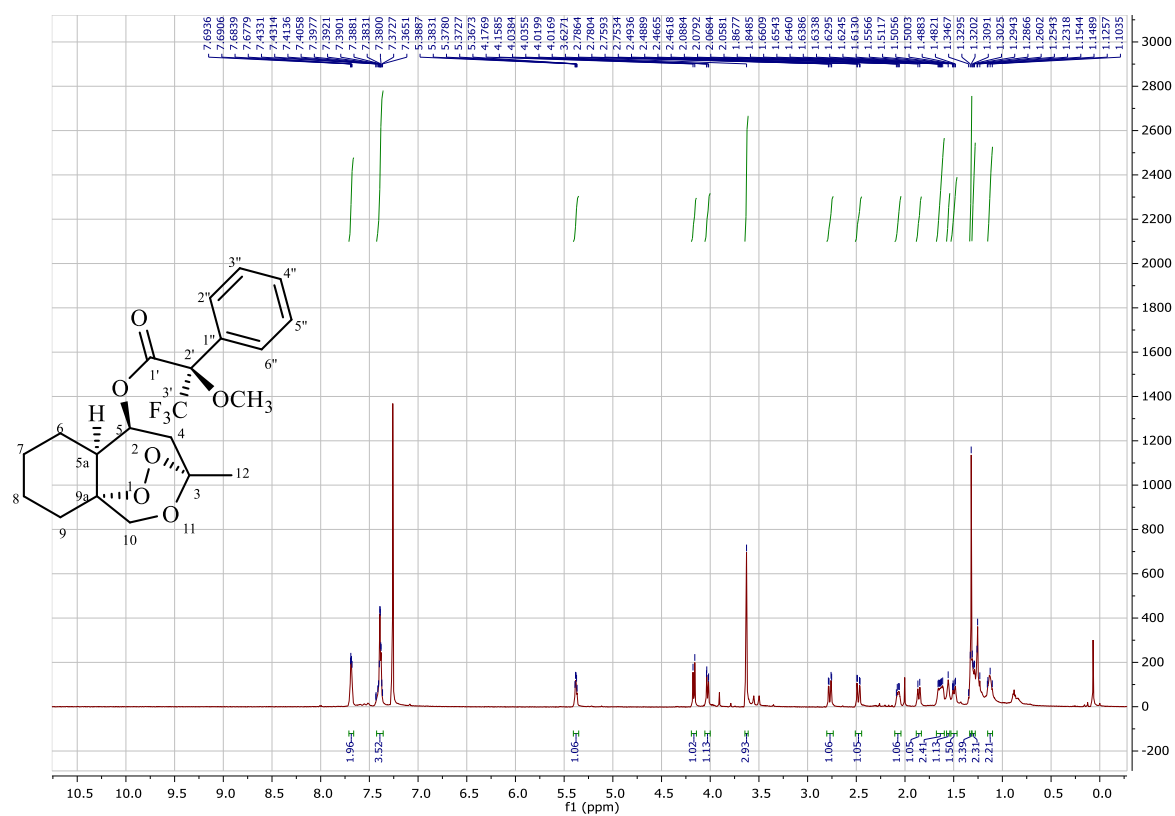

Figure S63.  $^1\text{H}$ -spectrum of the compound **19b** (CDCl<sub>3</sub>, 400 MHz).

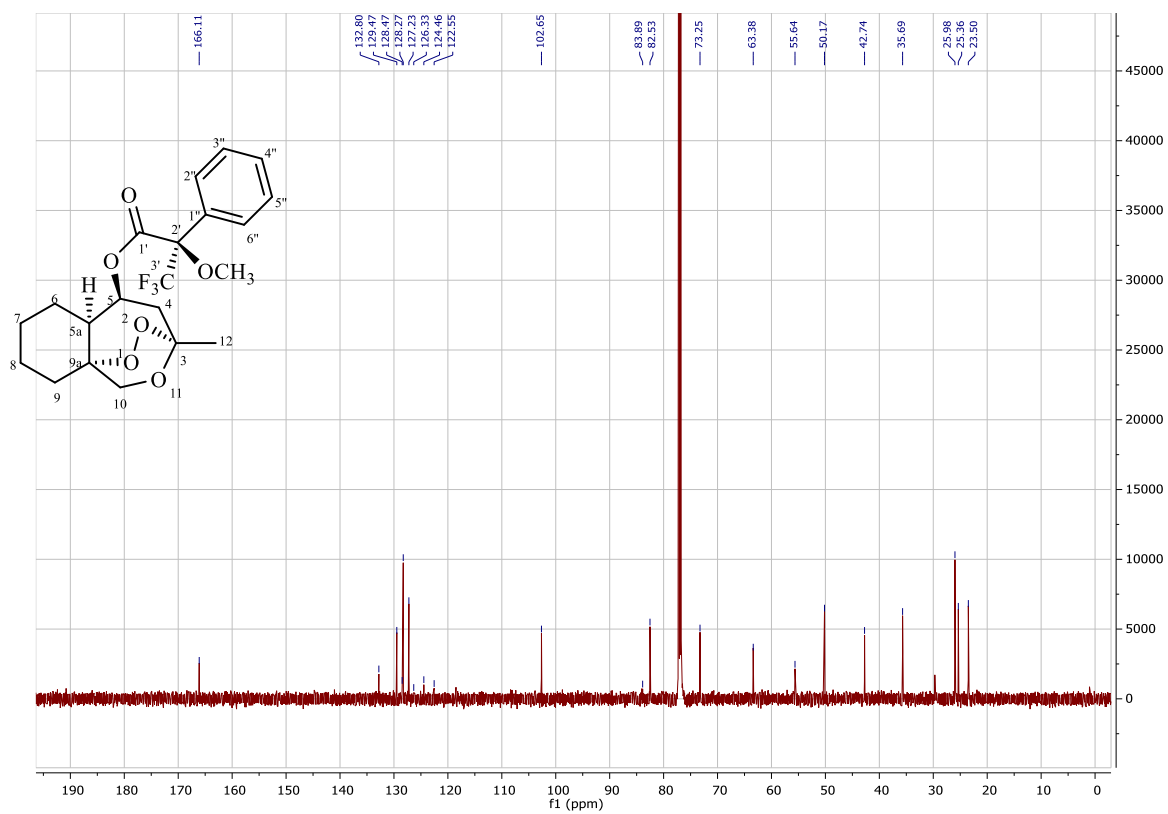

Figure S64. <sup>13</sup>C-NMR spectrum of the compound **19b** (CDCl<sub>3</sub>, 100 MHz).

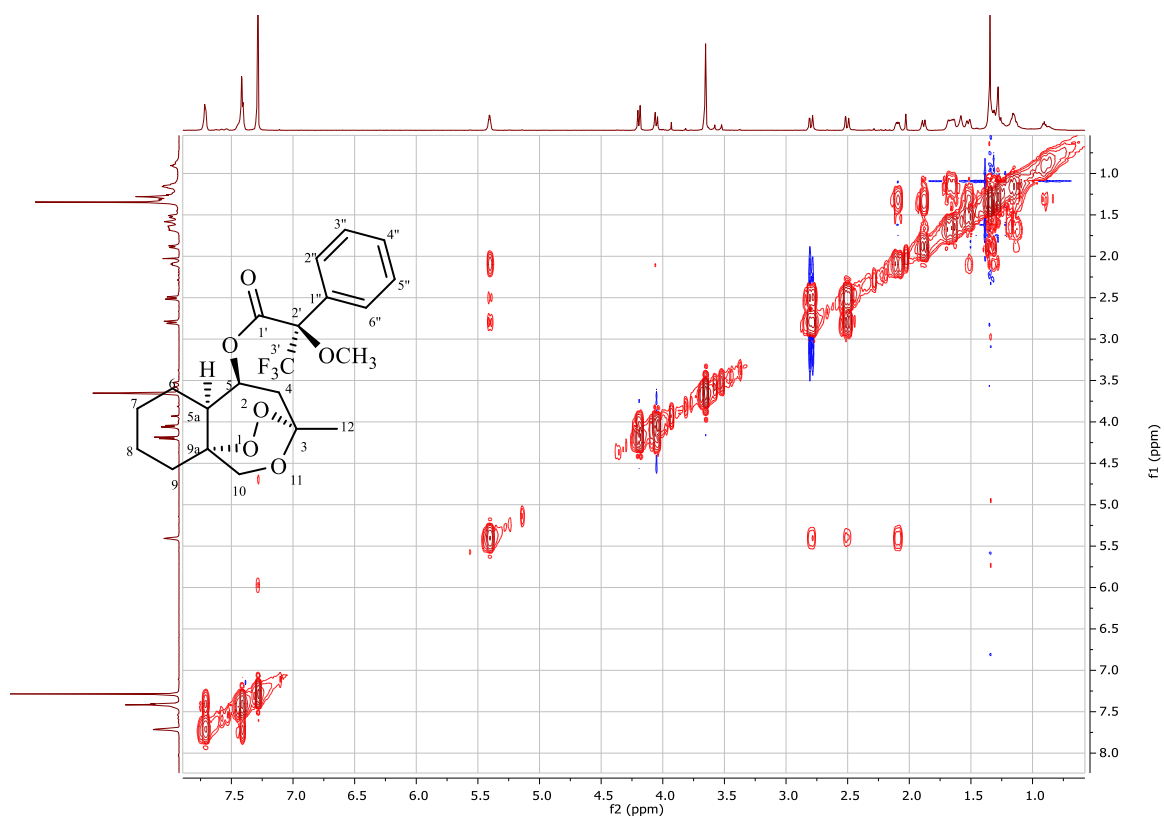

Figure S65. COSY spectrum of the compound **19b**.

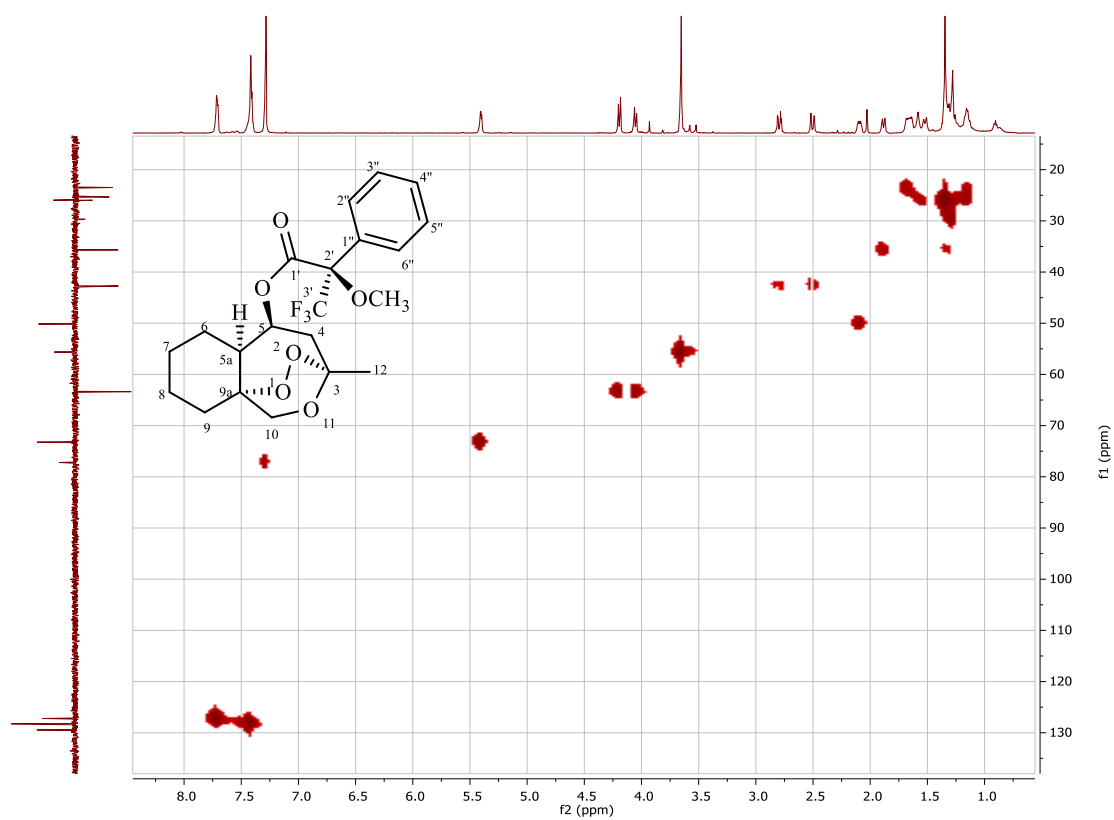

Figure S66. HSQC spectrum of the compound **19b**.

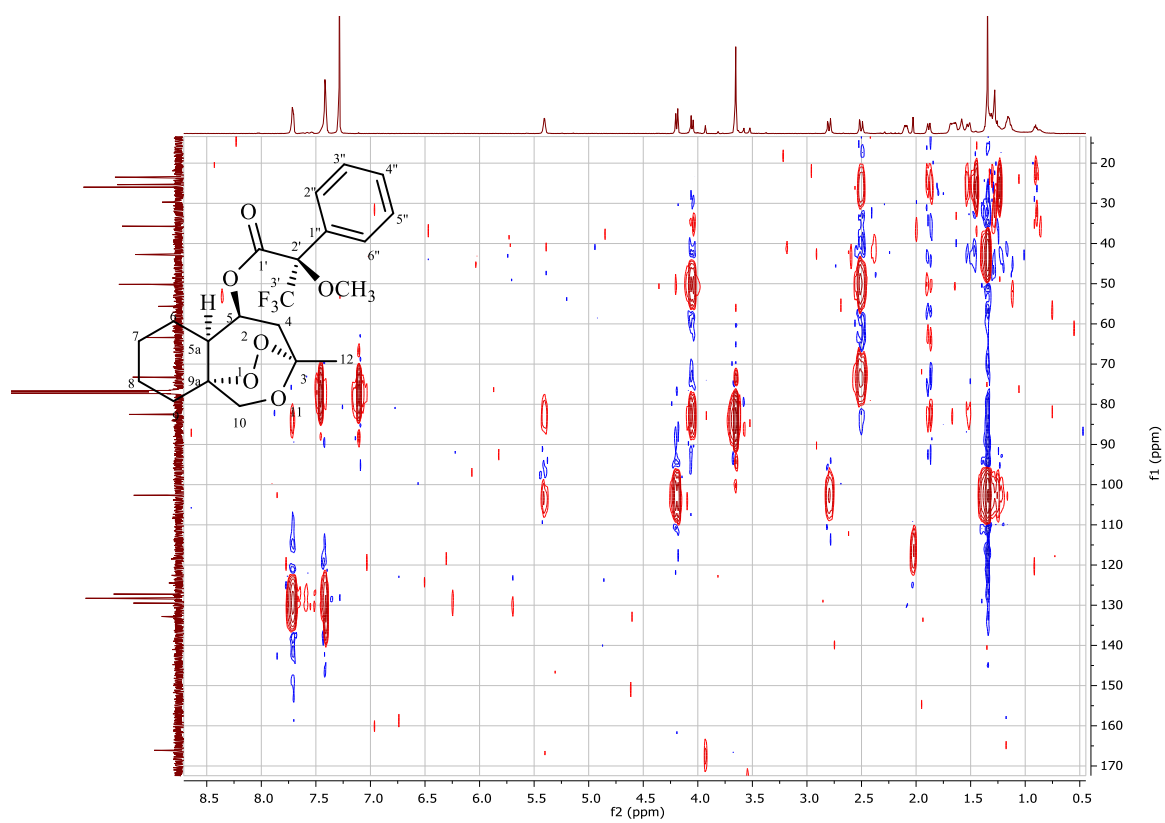

Figure S67. HMBC spectrum of the compound **19b**.

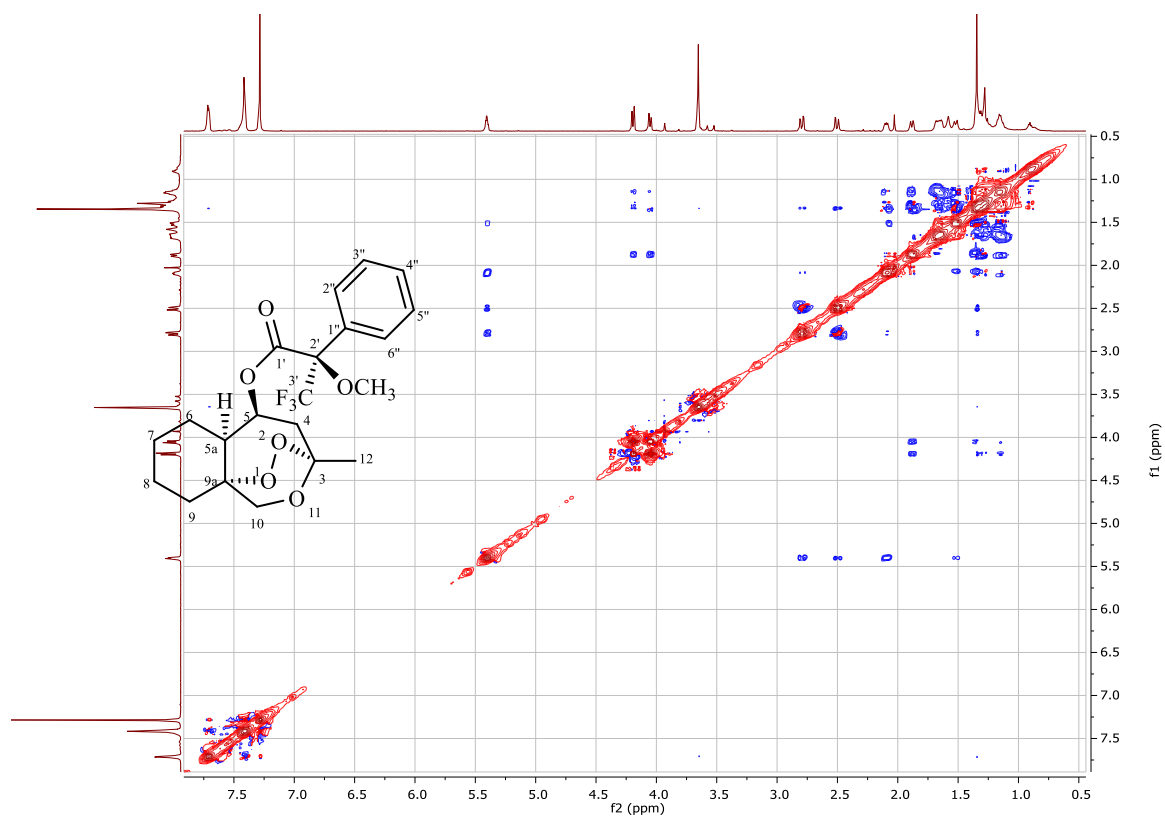

Figure S68. NOESY spectrum of the compound **19b**.



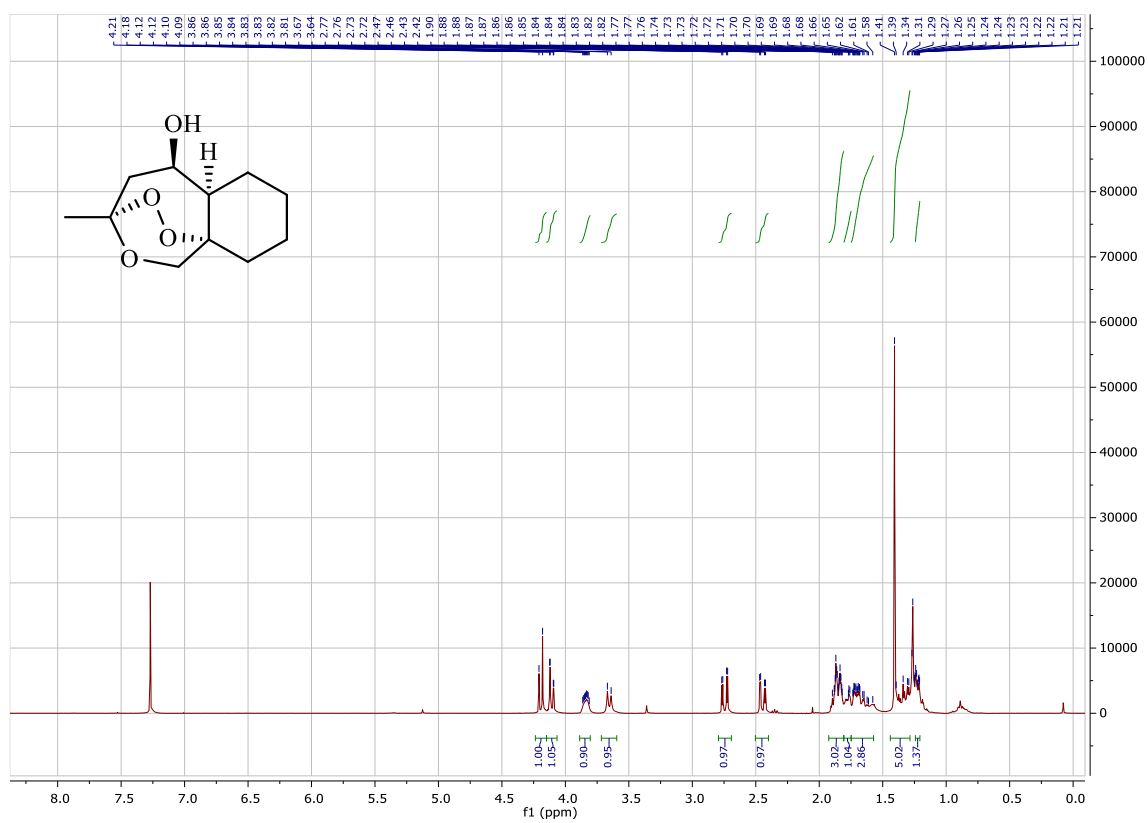

Figure S69. <sup>1</sup>H-spectrum of the compound 2a (CDCl<sub>3</sub>, 400 MHz).

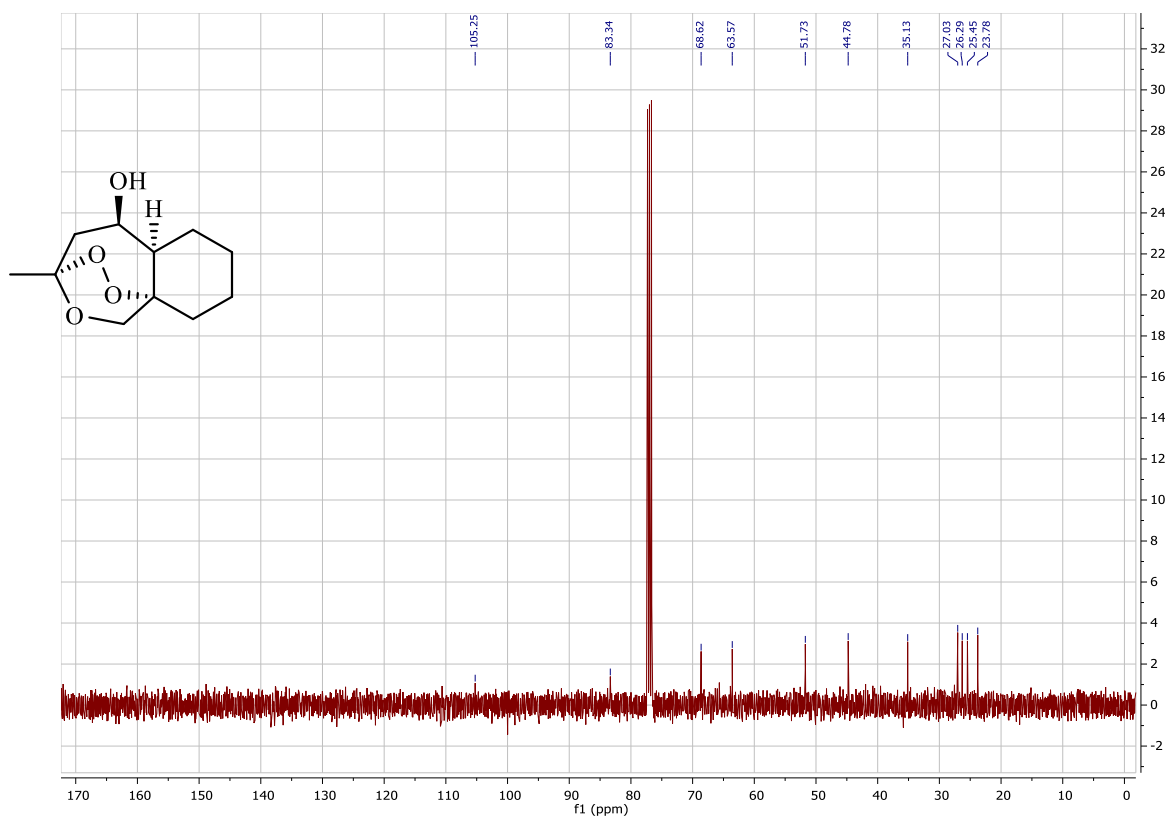

Figure S70.  $^{13}\text{C}$ -NMR spectrum of the compound **2a** (CDCl<sub>3</sub>, 100 MHz).

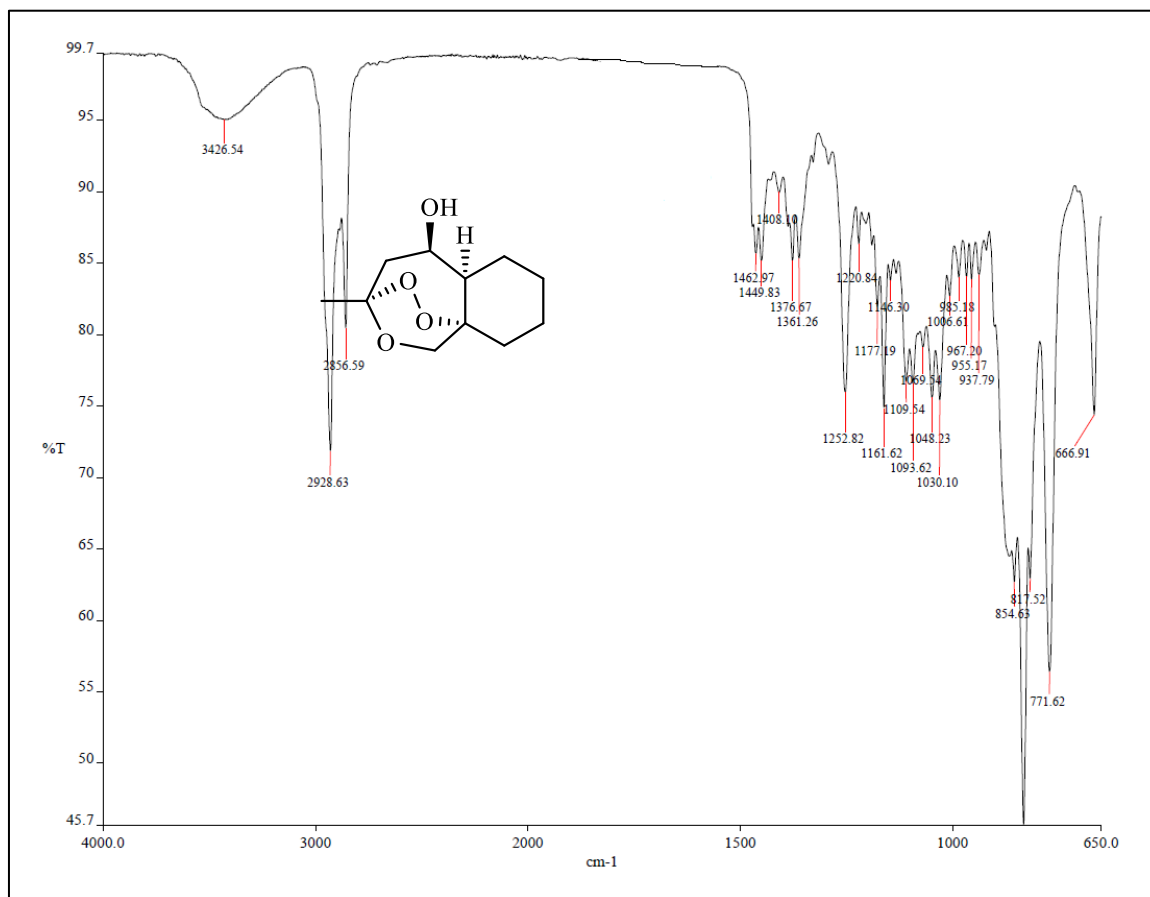

Figure S71. IR-spectrum of the compound **2a**.

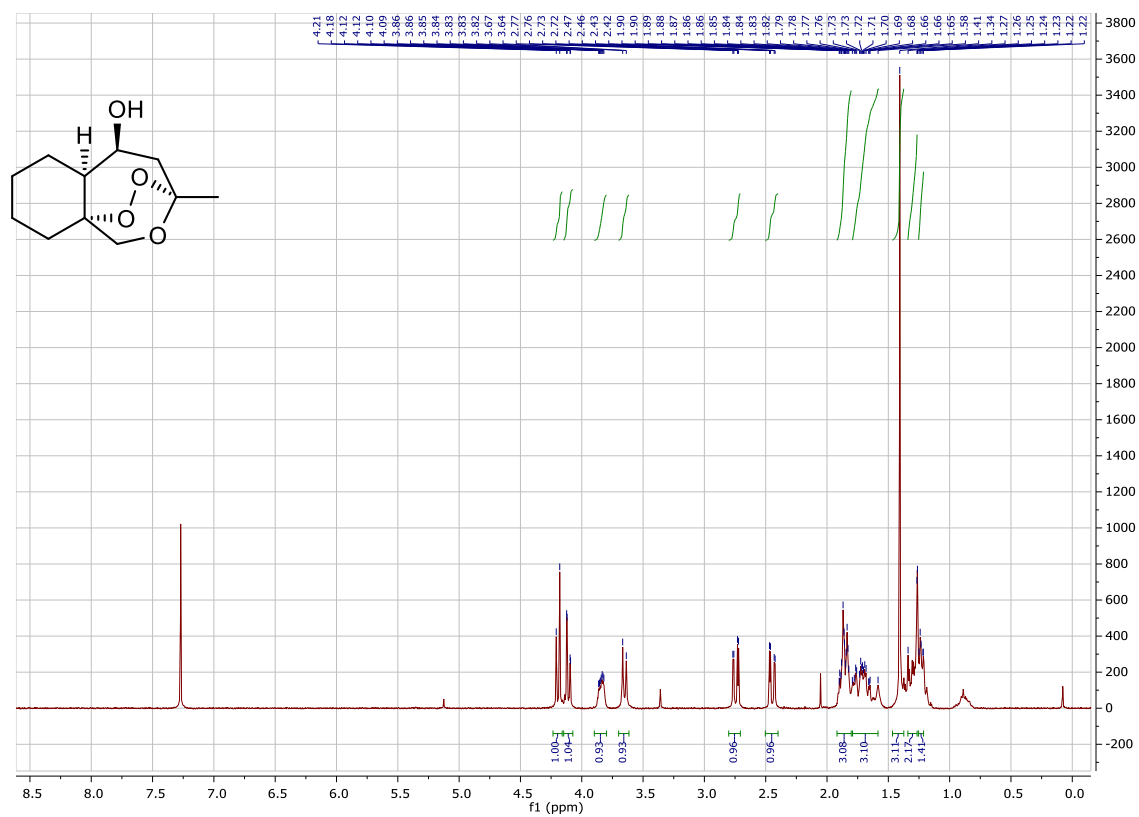

Figure S72. <sup>1</sup>H-spectrum of the compound **2b** (CDCl<sub>3</sub>, 400 MHz).

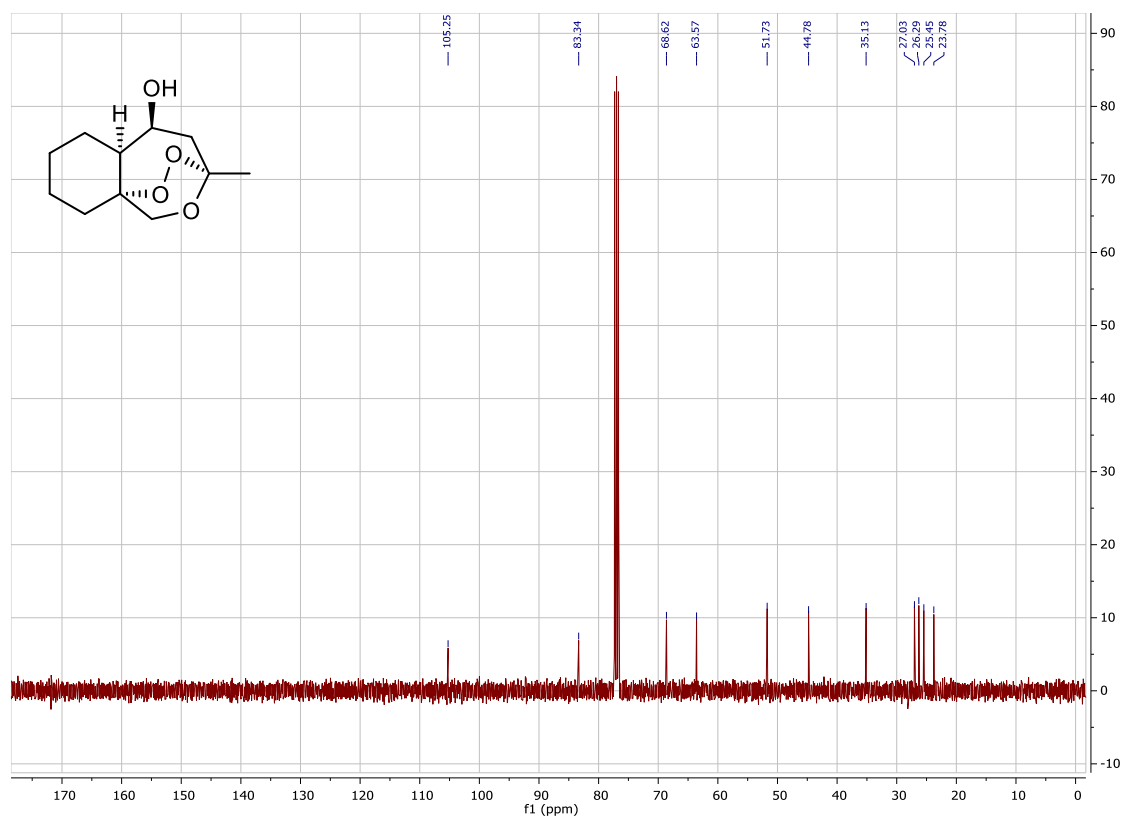

Figure S73.  $^{13}\text{C}$ -NMR spectrum of the compound **2b** (CDCl<sub>3</sub>, 100 MHz).

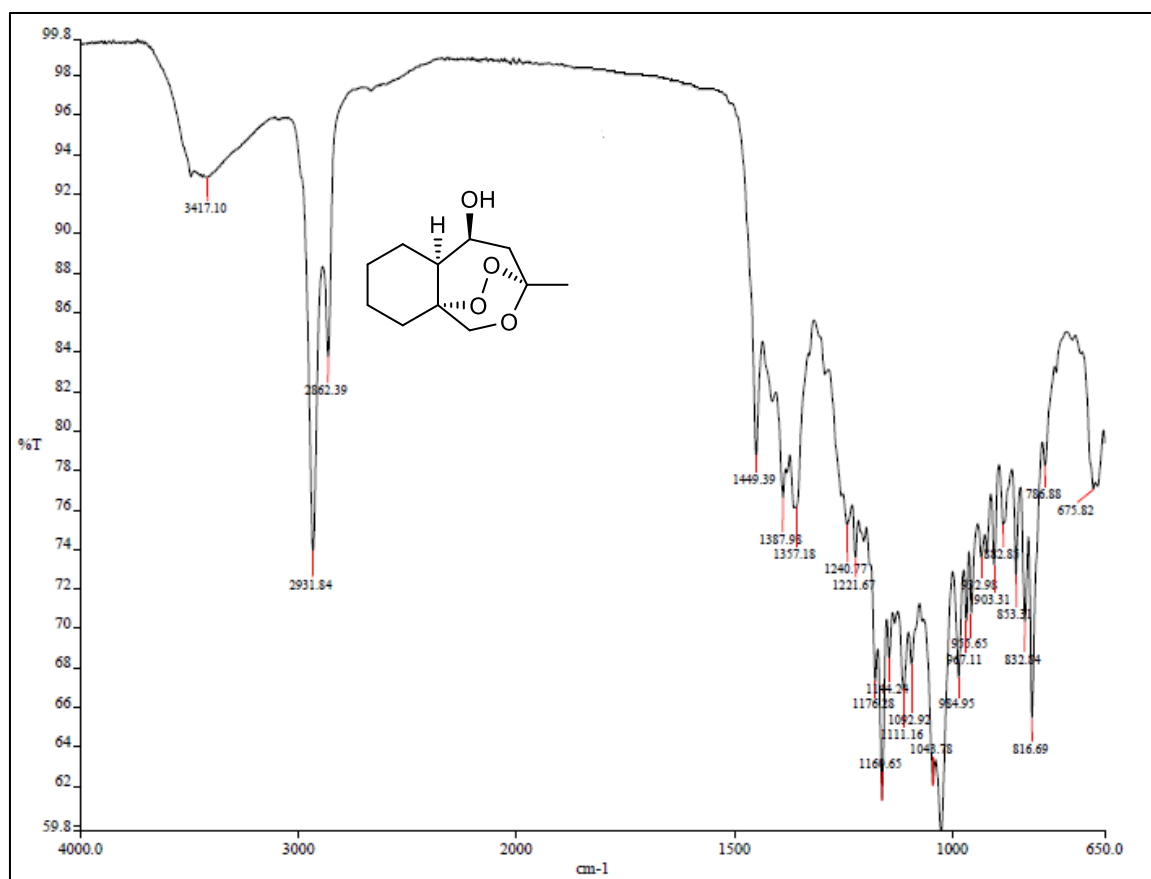

Figure S74. IR-spectrum of the compound **2b**.

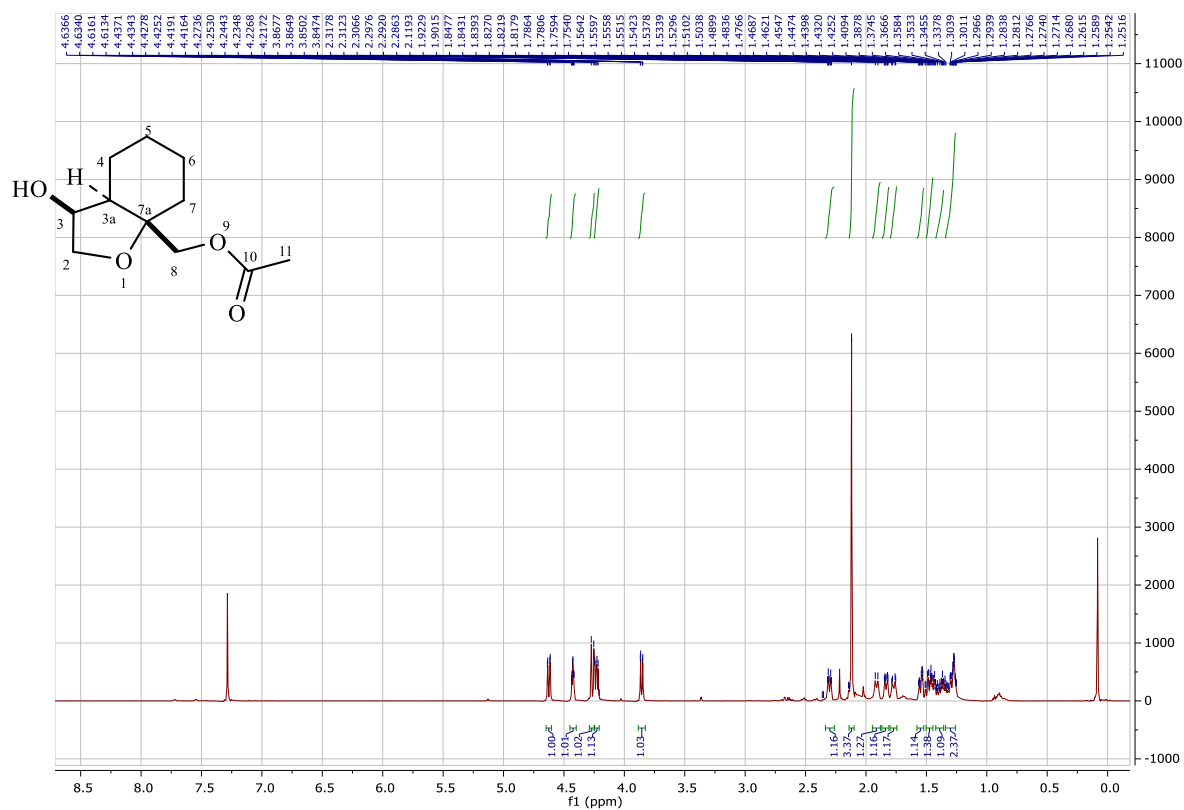

Figure S75. <sup>1</sup>H-spectrum of the compound **22** (CDCl<sub>3</sub>, 400 MHz).

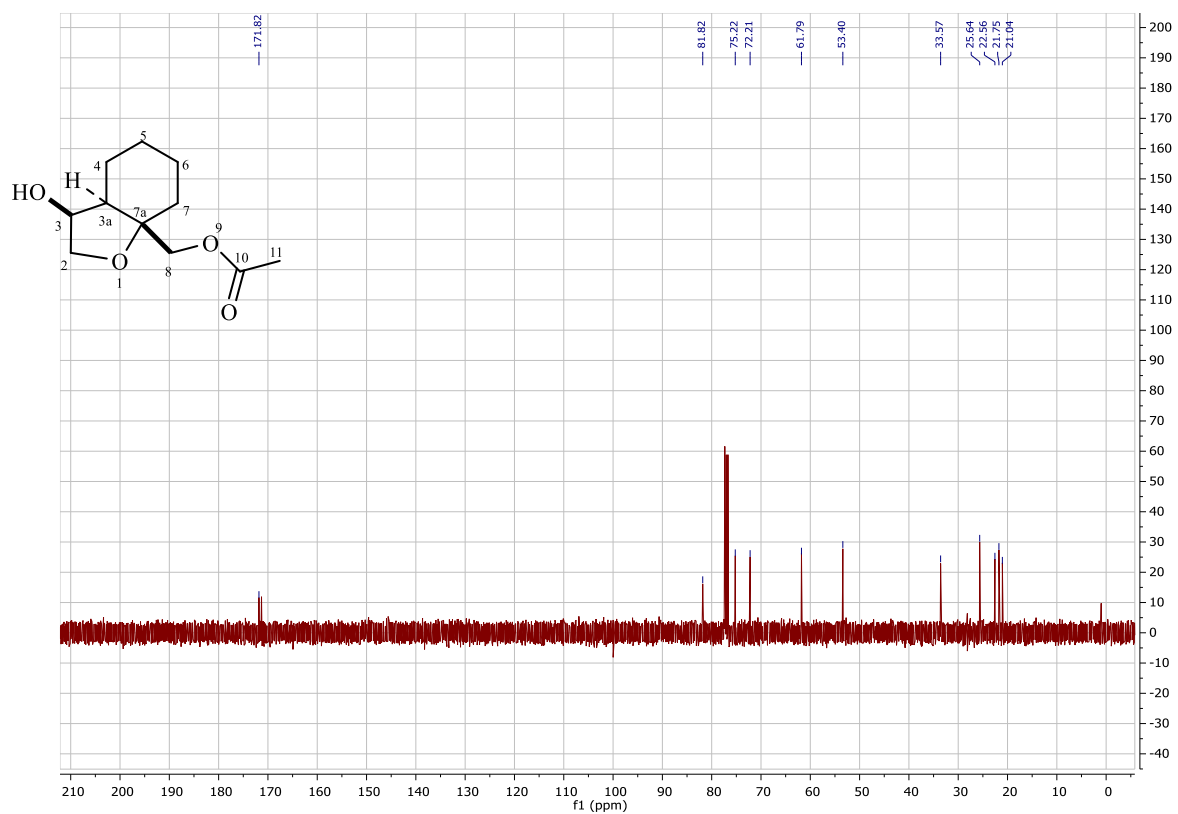

Figure S76.  $^{13}\text{C}$ -NMR spectrum of the compound **22** (CDCl<sub>3</sub>, 100 MHz).





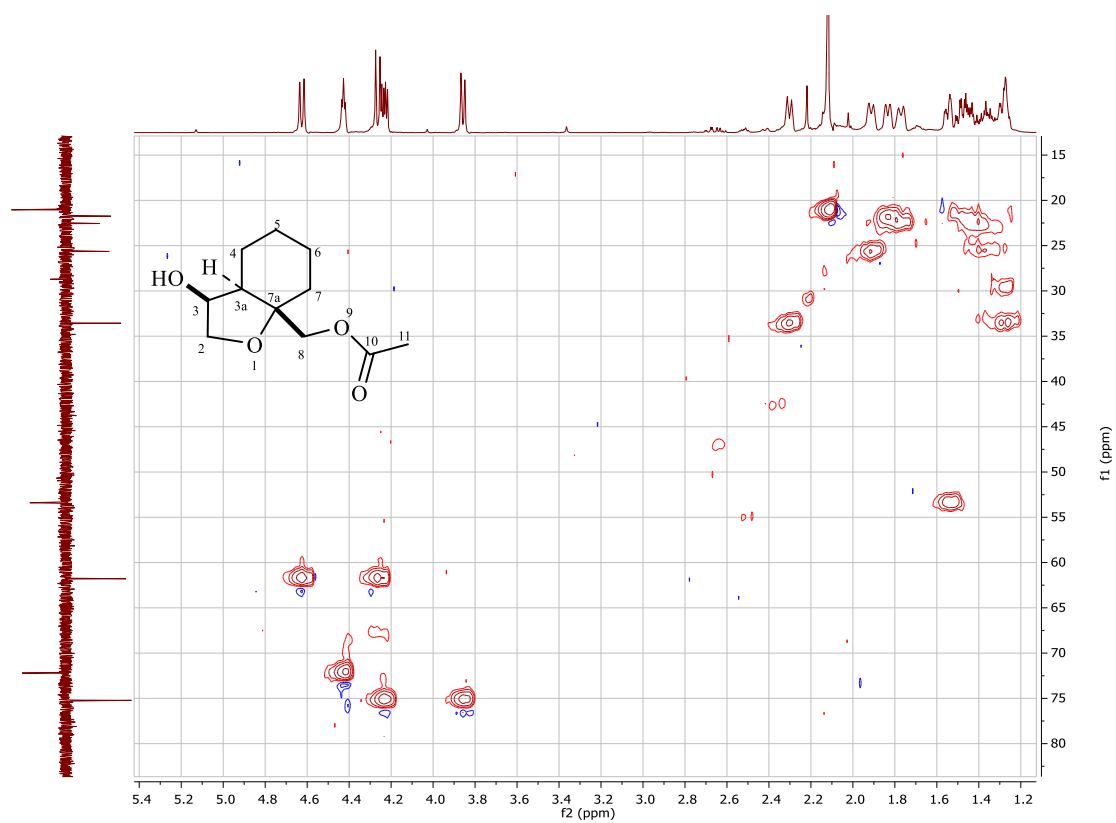

Figure S78. HSQC spectrum of the compound 22.

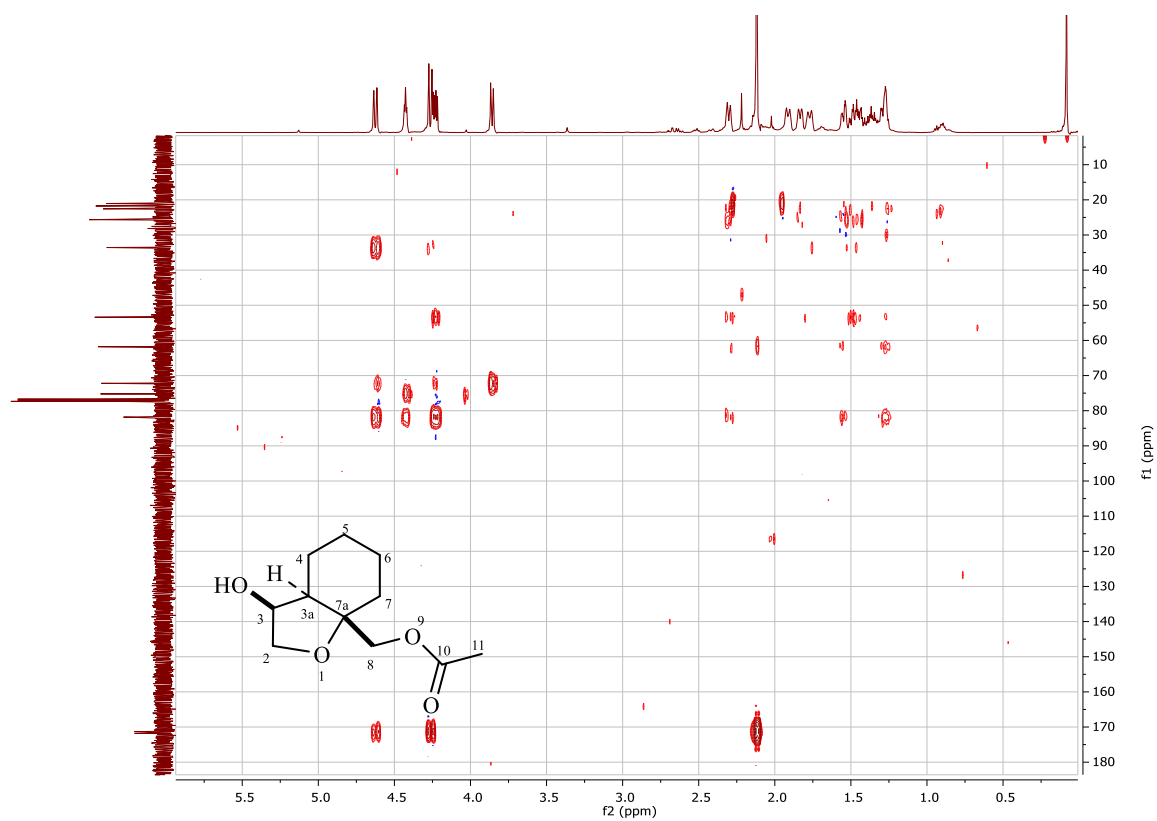

Figure S79. HMBC spectrum of the compound **22**.

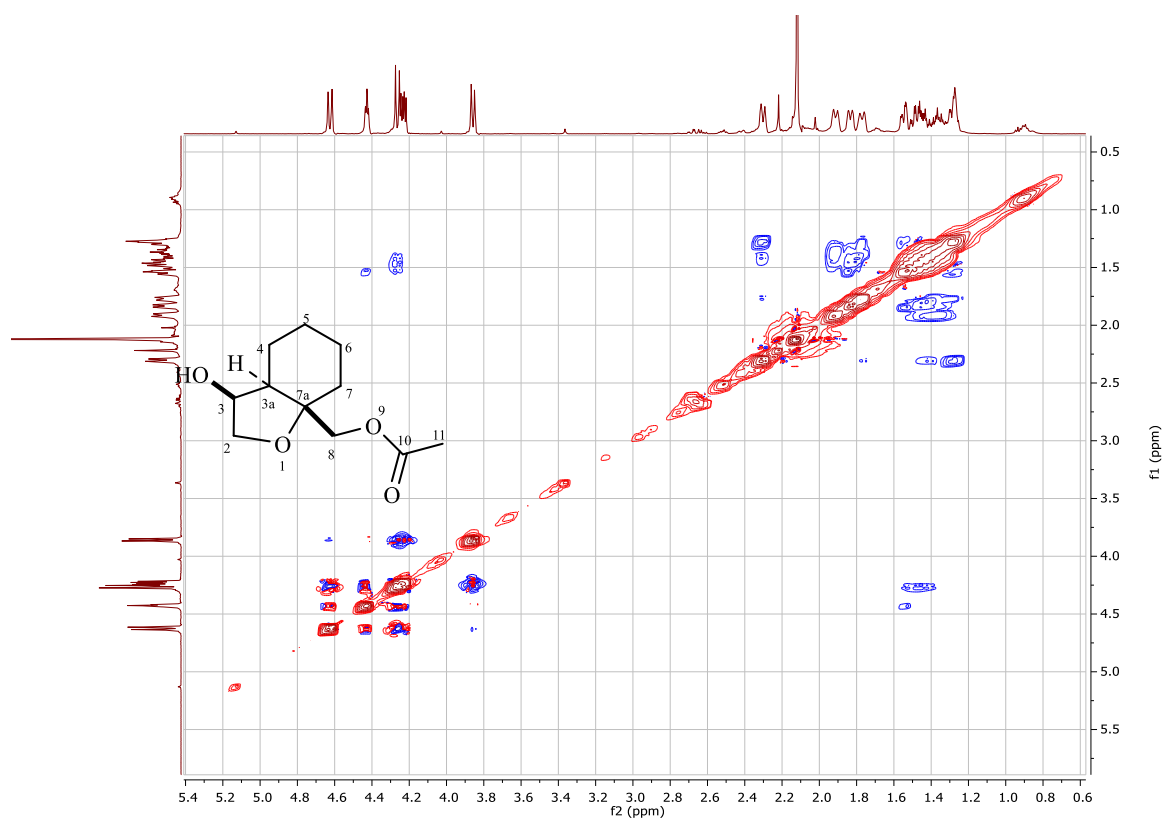

Figure S80. NOESY spectrum of the compound **22**.

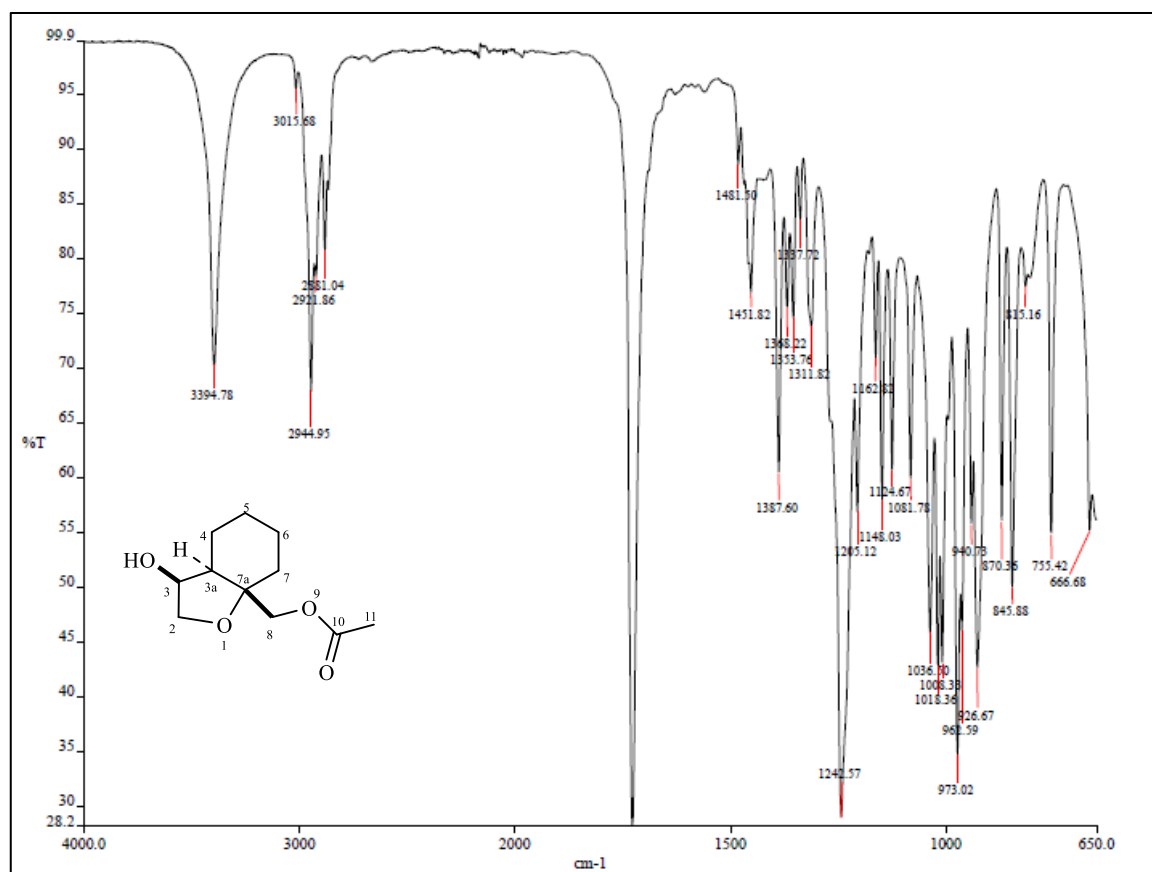

Figure S81. IR-spectrum of the compound 22.

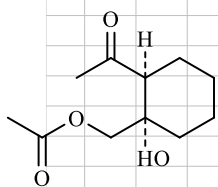

Figure S82.  $^1\text{H}$ -spectrum of the compound **29** ( $\text{CDCl}_3$ , 400 MHz).

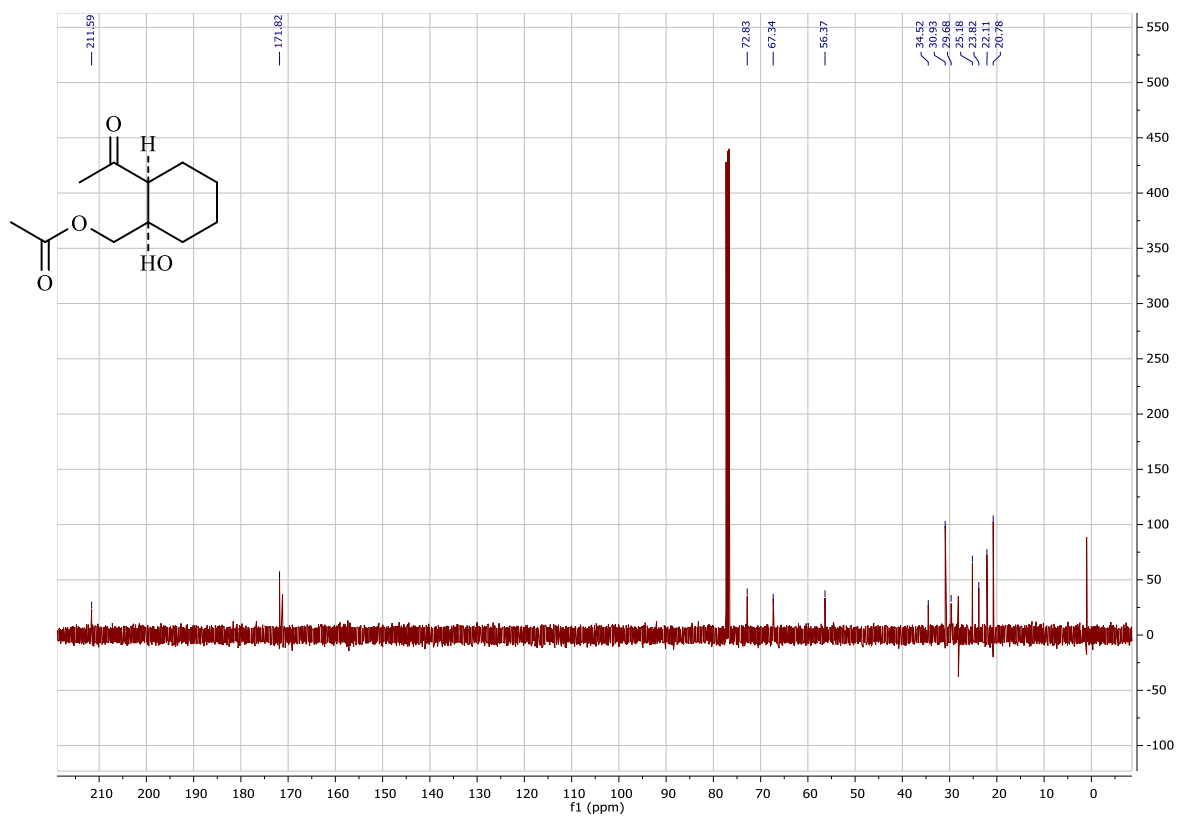

Figure S83.  $^{13}\text{C}$ -NMR spectrum of the compound **29** (CDCl<sub>3</sub>, 100 MHz).

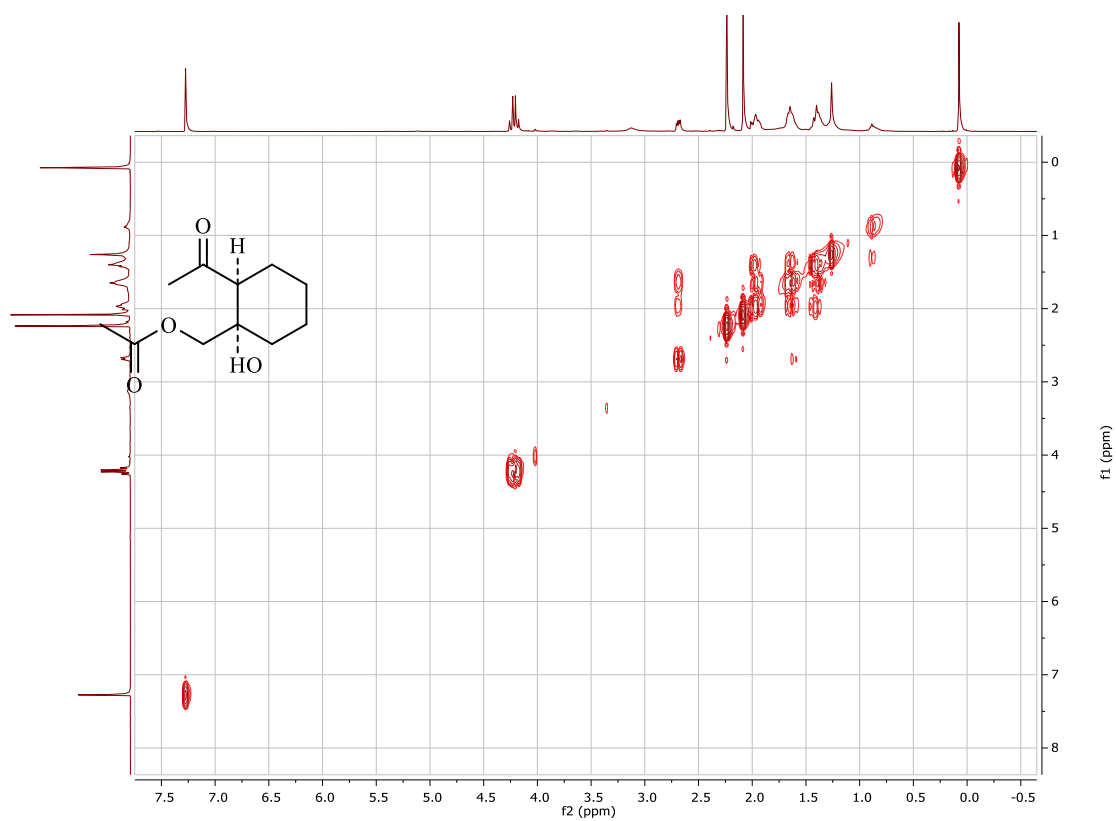

Figure S84. COSY spectrum of the compound **29**.



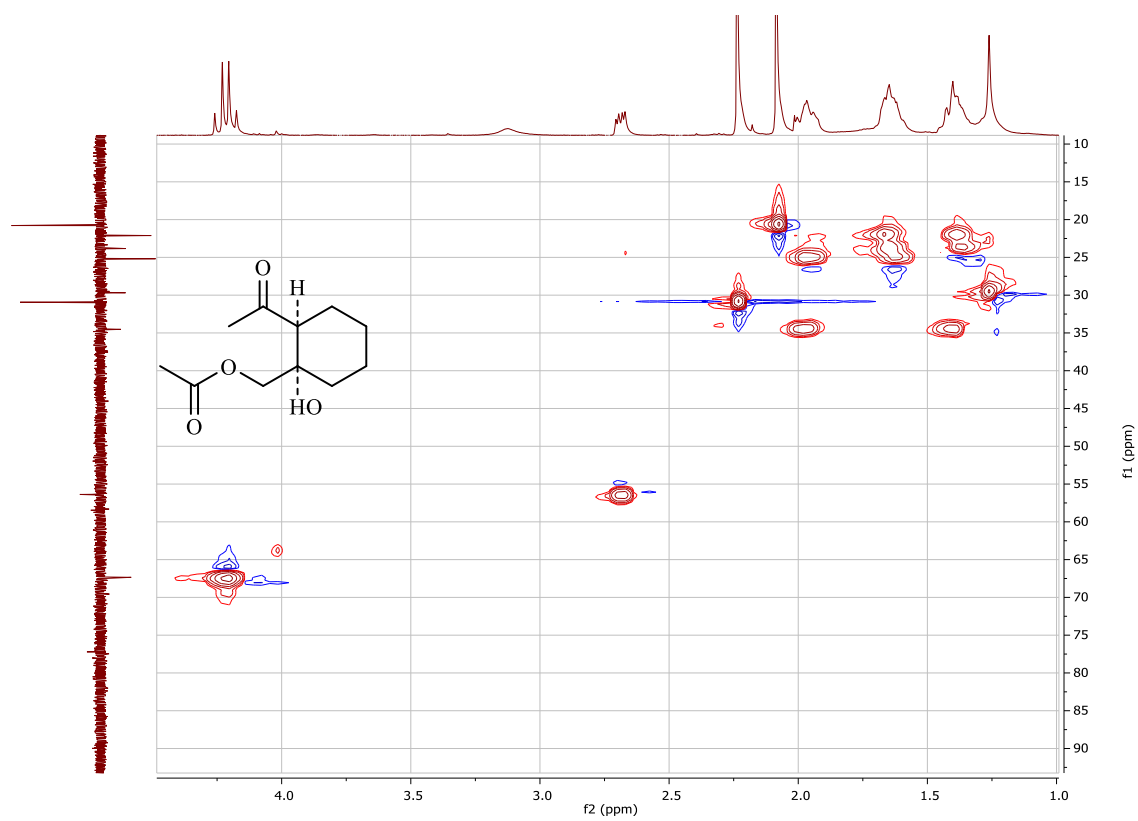

Figure S85. HSQC spectrum of the compound **29**.

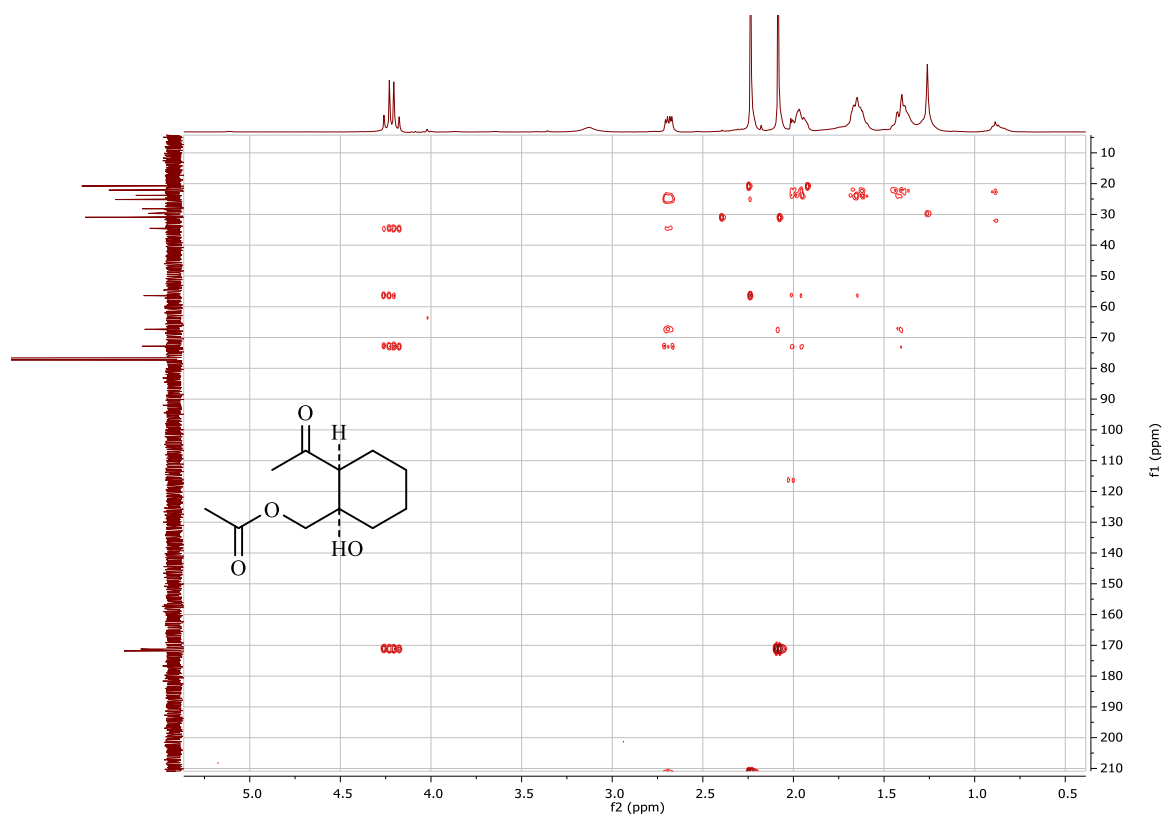

Figure S86. HMBC spectrum of the compound **29**.

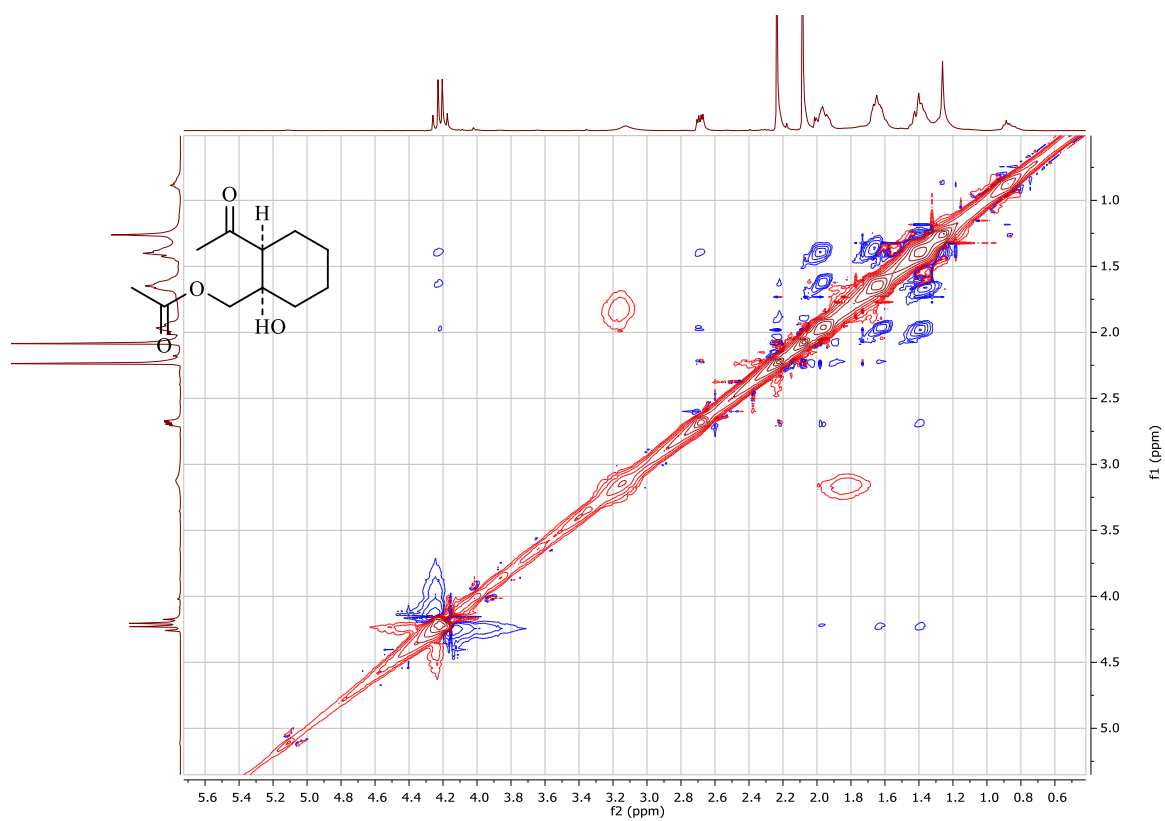

Figure S87. NOESY spectrum of the compound **29**.
