# Supplementary material for: Structure–Activity Relationships of the Antimalarial Agent Artemisinin 10. Synthesis and Antimalarial Activity of Enantiomers of rac-5β-Hydroxy-d-Secoartemisinin and Analogs: Implications Regarding the Mechanism of Action
Source: Molecules. 2021 Jul 8;26(14):4163. doi: 10.3390/molecules26144163 (PMC8304634; doi:10.3390/molecules26144163)
Supplement: Supplementary file 1 [file molecules-26-04163-s001.zip › CIF Endoperoxide Avery.txt]

data_MJ59
 
_audit_creation_method            SHELXL-97
_chemical_name_systematic
;
 ?
;
_chemical_name_common             ?
_chemical_melting_point           ?
_chemical_absolute_configuration   unk
_chemical_formula_moiety  'C11 H18 O4'
_chemical_formula_sum     'C11 H18 O4'
_chemical_formula_weight          214.25
 
loop_
 _atom_type_symbol
 _atom_type_description
 _atom_type_scat_dispersion_real
 _atom_type_scat_dispersion_imag
 _atom_type_scat_source
 'C'  'C'   0.0033   0.0016
 'International Tables Vol C Tables 4.2.6.8 and 6.1.1.4'
 'H'  'H'   0.0000   0.0000
 'International Tables Vol C Tables 4.2.6.8 and 6.1.1.4'
 'O'  'O'   0.0106   0.0060
 'International Tables Vol C Tables 4.2.6.8 and 6.1.1.4'
 
_symmetry_space_group_name_H-M 'P 21 21 21    '
_symmetry_space_group_name_Hall  'P 2ac 2ab '
_symmetry_cell_setting         'Orthorhombic'
 
loop_
 _symmetry_equiv_pos_as_xyz
 'x, y, z'
 '-x+1/2, -y, z+1/2'
 'x+1/2, -y+1/2, -z'
 '-x, y+1/2, -z+1/2'
 
_cell_length_a                    5.7823(5)
_cell_length_b                    7.6135(10)
_cell_length_c                    23.795(3)
_cell_angle_alpha                 90
_cell_angle_beta                  90
_cell_angle_gamma                 90
_cell_volume                      1047.5(2)
_cell_formula_units_Z             4
_cell_measurement_temperature     90.0(5)
_cell_measurement_reflns_used     2781
_cell_measurement_theta_min        2.546
_cell_measurement_theta_max        37.036
 
_exptl_crystal_description        prism
_exptl_crystal_colour             colorless
_exptl_crystal_size_max           0.38
_exptl_crystal_size_mid           0.30
_exptl_crystal_size_min           0.16
_exptl_crystal_density_meas       ?
_exptl_crystal_density_diffrn     1.359
_exptl_crystal_density_method     'not measured'
_exptl_crystal_F_000              464
_exptl_absorpt_coefficient_mu     0.102
_exptl_absorpt_correction_type    'multi-scan' 
_exptl_absorpt_correction_T_min   0.9324
_exptl_absorpt_correction_T_max   0.9838
_exptl_absorpt_process_details    'Denzo & Scalepack (Otwinowski & Minor, 1997)'
 
_exptl_special_details
;
 ?
;
 
_diffrn_ambient_temperature       90.0(5)
_diffrn_radiation_wavelength      0.71073
_diffrn_radiation_type            MoK\a
_diffrn_radiation_source          'fine-focus sealed tube'
_diffrn_radiation_monochromator   graphite
_diffrn_measurement_device        'Nonius KappaCCD '
_diffrn_measurement_method       '\f and \w scans '
_diffrn_detector_area_resol_mean  ?
_diffrn_standards_number          ?
_diffrn_standards_interval_count  ?
_diffrn_standards_interval_time   ?
_diffrn_standards_decay_%         ?
_diffrn_reflns_number             17349
_diffrn_reflns_av_R_equivalents   0.060
_diffrn_reflns_av_sigmaI/netI     0.0326
_diffrn_reflns_limit_h_min        -9
_diffrn_reflns_limit_h_max        9
_diffrn_reflns_limit_k_min        -12
_diffrn_reflns_limit_k_max        12
_diffrn_reflns_limit_l_min        -39
_diffrn_reflns_limit_l_max        39
_diffrn_reflns_theta_min          3.18
_diffrn_reflns_theta_max          36.64
_reflns_number_total              4872
_reflns_number_gt                 4398
_reflns_threshold_expression      I>2\s(I)
 
_computing_data_collection  'COLLECT (Nonius, 2000)'
_computing_data_reduction  'Denzo and Scalepack (Otwinowski & Minor, 1997)' 
_computing_cell_refinement    'Denzo and Scalepack (Otwinowski & Minor, 1997)' 
_computing_structure_solution   'Direct_methods (SIR, Altomare, et al., 1994)'
_computing_structure_refinement   'SHELXL-97 (Sheldrick, 1997)' 
_computing_molecular_graphics    ?
_computing_publication_material   'SHELXL-97 (Sheldrick, 1997)'
 
_refine_special_details
;
 Refinement of F^2^ against ALL reflections.  The weighted R-factor wR and
 goodness of fit S are based on F^2^, conventional R-factors R are based
 on F, with F set to zero for negative F^2^. The threshold expression of
 F^2^ > 2sigma(F^2^) is used only for calculating R-factors(gt) etc. and is
 not relevant to the choice of reflections for refinement.  R-factors based
 on F^2^ are statistically about twice as large as those based on F, and R-
 factors based on ALL data will be even larger.
;
 
_refine_ls_structure_factor_coef  Fsqd
_refine_ls_matrix_type            full
_refine_ls_weighting_scheme       calc
_refine_ls_weighting_details
 'calc w=1/[\s^2^(Fo^2^)+(0.0507P)^2^+0.2944P] where P=(Fo^2^+2Fc^2^)/3'
_atom_sites_solution_primary      direct
_atom_sites_solution_secondary    difmap
_atom_sites_solution_hydrogens    geom
_refine_ls_hydrogen_treatment     mixed
_refine_ls_extinction_method      SHELXL
_refine_ls_extinction_coef        0.014(5)
_refine_ls_extinction_expression
 'Fc^*^=kFc[1+0.001xFc^2^\l^3^/sin(2\q)]^-1/4^'
_refine_ls_abs_structure_details  '2029 Friedel pairs (Flack, 1983) '
_refine_ls_abs_structure_Flack    -0.4(6)
_refine_ls_number_reflns          4872
_refine_ls_number_parameters      141
_refine_ls_number_restraints      0
_refine_ls_R_factor_all           0.0490
_refine_ls_R_factor_gt            0.0407
_refine_ls_wR_factor_ref          0.1059
_refine_ls_wR_factor_gt           0.0986
_refine_ls_goodness_of_fit_ref    1.036
_refine_ls_restrained_S_all       1.036
_refine_ls_shift/su_max           0.001
_refine_ls_shift/su_mean          0.000
 
loop_
 _atom_site_label
 _atom_site_type_symbol
 _atom_site_fract_x
 _atom_site_fract_y
 _atom_site_fract_z
 _atom_site_U_iso_or_equiv
 _atom_site_adp_type
 _atom_site_occupancy
 _atom_site_symmetry_multiplicity
 _atom_site_calc_flag
 _atom_site_refinement_flags
 _atom_site_disorder_assembly
 _atom_site_disorder_group
O1 O 0.42397(13) 0.90116(10) 0.63709(3) 0.01436(13) Uani 1 1 d . . .
O2 O 0.05400(12) 0.85238(9) 0.60378(3) 0.01439(14) Uani 1 1 d . . .
O3 O 0.09426(13) 0.67200(10) 0.58360(3) 0.01506(13) Uani 1 1 d . . .
O4 O 0.56432(16) 0.66641(13) 0.71411(3) 0.02383(18) Uani 1 1 d . . .
H4O H 0.579(4) 0.760(3) 0.6970(8) 0.036 Uiso 1 1 d . . .
C1 C 0.18485(16) 0.88128(13) 0.65319(4) 0.01245(15) Uani 1 1 d . . .
C2 C 0.15938(19) 0.73259(14) 0.69645(4) 0.01607(17) Uani 1 1 d . . .
H2A H 0.1574 0.7847 0.7346 0.019 Uiso 1 1 calc R . .
H2B H 0.0085 0.6741 0.6905 0.019 Uiso 1 1 calc R . .
C3 C 0.35013(19) 0.59376(14) 0.69407(4) 0.01763(18) Uani 1 1 d . . .
H3 H 0.3053 0.4996 0.7213 0.021 Uiso 1 1 calc R . .
C4 C 0.37426(18) 0.50420(13) 0.63614(4) 0.01414(16) Uani 1 1 d . . .
H4 H 0.2450 0.4172 0.6339 0.017 Uiso 1 1 calc R . .
C5 C 0.34161(16) 0.62775(12) 0.58549(4) 0.01152(14) Uani 1 1 d . . .
C6 C 0.47804(16) 0.79826(13) 0.58800(4) 0.01352(16) Uani 1 1 d . . .
H6A H 0.6454 0.7708 0.5880 0.016 Uiso 1 1 calc R . .
H6B H 0.4443 0.8685 0.5540 0.016 Uiso 1 1 calc R . .
C7 C 0.09913(19) 1.05684(13) 0.67451(4) 0.01738(17) Uani 1 1 d . . .
H7A H 0.0950 1.1412 0.6434 0.026 Uiso 1 1 calc R . .
H7B H 0.2036 1.1000 0.7039 0.026 Uiso 1 1 calc R . .
H7C H -0.0567 1.0431 0.6901 0.026 Uiso 1 1 calc R . .
C8 C 0.5983(2) 0.39587(14) 0.63280(4) 0.01879(18) Uani 1 1 d . . .
H8A H 0.7327 0.4750 0.6375 0.023 Uiso 1 1 calc R . .
H8B H 0.6008 0.3097 0.6640 0.023 Uiso 1 1 calc R . .
C9 C 0.6200(2) 0.29817(14) 0.57677(4) 0.01959(19) Uani 1 1 d . . .
H9A H 0.7686 0.2338 0.5756 0.024 Uiso 1 1 calc R . .
H9B H 0.4930 0.2116 0.5732 0.024 Uiso 1 1 calc R . .
C10 C 0.60889(19) 0.42805(14) 0.52824(4) 0.01750(18) Uani 1 1 d . . .
H10A H 0.6205 0.3638 0.4922 0.021 Uiso 1 1 calc R . .
H10B H 0.7412 0.5103 0.5307 0.021 Uiso 1 1 calc R . .
C11 C 0.38201(19) 0.53182(14) 0.52982(4) 0.01568(17) Uani 1 1 d . . .
H11A H 0.3828 0.6189 0.4989 0.019 Uiso 1 1 calc R . .
H11B H 0.2517 0.4501 0.5231 0.019 Uiso 1 1 calc R . .
 
loop_
 _atom_site_aniso_label
 _atom_site_aniso_U_11
 _atom_site_aniso_U_22
 _atom_site_aniso_U_33
 _atom_site_aniso_U_23
 _atom_site_aniso_U_13
 _atom_site_aniso_U_12
O1 0.0112(3) 0.0159(3) 0.0161(3) -0.0031(2) 0.0008(2) -0.0033(2)
O2 0.0138(3) 0.0140(3) 0.0154(3) -0.0025(2) -0.0041(2) 0.0027(2)
O3 0.0111(3) 0.0144(3) 0.0197(3) -0.0046(2) -0.0031(2) -0.0004(2)
O4 0.0227(4) 0.0317(4) 0.0171(3) -0.0030(3) -0.0083(3) 0.0091(4)
C1 0.0106(3) 0.0149(4) 0.0118(3) -0.0007(3) -0.0005(3) -0.0008(3)
C2 0.0170(4) 0.0181(4) 0.0130(3) 0.0022(3) 0.0030(3) 0.0016(3)
C3 0.0213(4) 0.0201(4) 0.0115(3) 0.0035(3) 0.0016(3) 0.0051(4)
C4 0.0155(4) 0.0142(4) 0.0127(3) 0.0027(3) 0.0010(3) 0.0008(3)
C5 0.0097(3) 0.0133(3) 0.0116(3) 0.0002(3) -0.0009(3) -0.0008(3)
C6 0.0127(4) 0.0142(4) 0.0137(3) -0.0001(3) 0.0019(3) -0.0026(3)
C7 0.0178(4) 0.0162(4) 0.0182(4) -0.0036(3) -0.0003(3) 0.0022(4)
C8 0.0214(4) 0.0198(4) 0.0152(4) 0.0012(3) -0.0003(3) 0.0070(4)
C9 0.0222(5) 0.0174(4) 0.0192(4) -0.0009(3) 0.0001(4) 0.0054(4)
C10 0.0178(4) 0.0198(4) 0.0149(4) -0.0021(3) 0.0010(3) 0.0027(4)
C11 0.0175(4) 0.0174(4) 0.0122(3) -0.0029(3) -0.0017(3) 0.0010(3)
 
_geom_special_details
;
 All esds (except the esd in the dihedral angle between two l.s. planes)
 are estimated using the full covariance matrix.  The cell esds are taken
 into account individually in the estimation of esds in distances, angles
 and torsion angles; correlations between esds in cell parameters are only
 used when they are defined by crystal symmetry.  An approximate (isotropic)
 treatment of cell esds is used for estimating esds involving l.s. planes.
;
 
loop_
 _geom_bond_atom_site_label_1
 _geom_bond_atom_site_label_2
 _geom_bond_distance
 _geom_bond_site_symmetry_2
 _geom_bond_publ_flag
O1 C6 1.4408(12) . ?
O1 C1 1.4427(12) . ?
O2 C1 1.4152(11) . ?
O2 O3 1.4734(10) . ?
O3 C5 1.4701(12) . ?
O4 C3 1.4377(15) . ?
O4 H4O 0.82(2) . ?
C1 C7 1.5131(14) . ?
C1 C2 1.5372(14) . ?
C2 C3 1.5288(15) . ?
C2 H2A 0.9900 . ?
C2 H2B 0.9900 . ?
C3 C4 1.5442(14) . ?
C3 H3 1.0000 . ?
C4 C8 1.5376(15) . ?
C4 C5 1.5405(13) . ?
C4 H4 1.0000 . ?
C5 C6 1.5202(13) . ?
C5 C11 1.5305(13) . ?
C6 H6A 0.9900 . ?
C6 H6B 0.9900 . ?
C7 H7A 0.9800 . ?
C7 H7B 0.9800 . ?
C7 H7C 0.9800 . ?
C8 C9 1.5319(14) . ?
C8 H8A 0.9900 . ?
C8 H8B 0.9900 . ?
C9 C10 1.5215(15) . ?
C9 H9A 0.9900 . ?
C9 H9B 0.9900 . ?
C10 C11 1.5319(15) . ?
C10 H10A 0.9900 . ?
C10 H10B 0.9900 . ?
C11 H11A 0.9900 . ?
C11 H11B 0.9900 . ?
 
loop_
 _geom_angle_atom_site_label_1
 _geom_angle_atom_site_label_2
 _geom_angle_atom_site_label_3
 _geom_angle
 _geom_angle_site_symmetry_1
 _geom_angle_site_symmetry_3
 _geom_angle_publ_flag
C6 O1 C1 111.48(7) . . ?
C1 O2 O3 109.35(7) . . ?
C5 O3 O2 110.93(6) . . ?
C3 O4 H4O 104.7(14) . . ?
O2 C1 O1 107.95(7) . . ?
O2 C1 C7 103.93(8) . . ?
O1 C1 C7 108.08(8) . . ?
O2 C1 C2 112.99(8) . . ?
O1 C1 C2 110.29(8) . . ?
C7 C1 C2 113.24(8) . . ?
C3 C2 C1 114.54(8) . . ?
C3 C2 H2A 108.6 . . ?
C1 C2 H2A 108.6 . . ?
C3 C2 H2B 108.6 . . ?
C1 C2 H2B 108.6 . . ?
H2A C2 H2B 107.6 . . ?
O4 C3 C2 110.07(9) . . ?
O4 C3 C4 112.83(8) . . ?
C2 C3 C4 113.80(8) . . ?
O4 C3 H3 106.5 . . ?
C2 C3 H3 106.5 . . ?
C4 C3 H3 106.5 . . ?
C8 C4 C5 112.97(8) . . ?
C8 C4 C3 111.05(8) . . ?
C5 C4 C3 114.69(8) . . ?
C8 C4 H4 105.8 . . ?
C5 C4 H4 105.8 . . ?
C3 C4 H4 105.8 . . ?
O3 C5 C6 108.08(8) . . ?
O3 C5 C11 103.37(7) . . ?
C6 C5 C11 111.24(8) . . ?
O3 C5 C4 106.45(7) . . ?
C6 C5 C4 115.28(8) . . ?
C11 C5 C4 111.53(8) . . ?
O1 C6 C5 112.55(7) . . ?
O1 C6 H6A 109.1 . . ?
C5 C6 H6A 109.1 . . ?
O1 C6 H6B 109.1 . . ?
C5 C6 H6B 109.1 . . ?
H6A C6 H6B 107.8 . . ?
C1 C7 H7A 109.5 . . ?
C1 C7 H7B 109.5 . . ?
H7A C7 H7B 109.5 . . ?
C1 C7 H7C 109.5 . . ?
H7A C7 H7C 109.5 . . ?
H7B C7 H7C 109.5 . . ?
C9 C8 C4 112.00(9) . . ?
C9 C8 H8A 109.2 . . ?
C4 C8 H8A 109.2 . . ?
C9 C8 H8B 109.2 . . ?
C4 C8 H8B 109.2 . . ?
H8A C8 H8B 107.9 . . ?
C10 C9 C8 109.97(8) . . ?
C10 C9 H9A 109.7 . . ?
C8 C9 H9A 109.7 . . ?
C10 C9 H9B 109.7 . . ?
C8 C9 H9B 109.7 . . ?
H9A C9 H9B 108.2 . . ?
C9 C10 C11 110.65(9) . . ?
C9 C10 H10A 109.5 . . ?
C11 C10 H10A 109.5 . . ?
C9 C10 H10B 109.5 . . ?
C11 C10 H10B 109.5 . . ?
H10A C10 H10B 108.1 . . ?
C5 C11 C10 113.45(8) . . ?
C5 C11 H11A 108.9 . . ?
C10 C11 H11A 108.9 . . ?
C5 C11 H11B 108.9 . . ?
C10 C11 H11B 108.9 . . ?
H11A C11 H11B 107.7 . . ?
 
loop_
 _geom_torsion_atom_site_label_1
 _geom_torsion_atom_site_label_2
 _geom_torsion_atom_site_label_3
 _geom_torsion_atom_site_label_4
 _geom_torsion
 _geom_torsion_site_symmetry_1
 _geom_torsion_site_symmetry_2
 _geom_torsion_site_symmetry_3
 _geom_torsion_site_symmetry_4
 _geom_torsion_publ_flag
C1 O2 O3 C5 -44.52(9) . . . . ?
O3 O2 C1 O1 74.34(9) . . . . ?
O3 O2 C1 C7 -171.05(7) . . . . ?
O3 O2 C1 C2 -47.90(10) . . . . ?
C6 O1 C1 O2 -31.50(10) . . . . ?
C6 O1 C1 C7 -143.33(8) . . . . ?
C6 O1 C1 C2 92.38(9) . . . . ?
O2 C1 C2 C3 95.84(10) . . . . ?
O1 C1 C2 C3 -25.07(11) . . . . ?
C7 C1 C2 C3 -146.33(9) . . . . ?
C1 C2 C3 O4 70.42(10) . . . . ?
C1 C2 C3 C4 -57.37(12) . . . . ?
O4 C3 C4 C8 41.78(12) . . . . ?
C2 C3 C4 C8 168.13(9) . . . . ?
O4 C3 C4 C5 -87.81(10) . . . . ?
C2 C3 C4 C5 38.54(13) . . . . ?
O2 O3 C5 C6 -19.36(9) . . . . ?
O2 O3 C5 C11 -137.36(7) . . . . ?
O2 O3 C5 C4 105.03(8) . . . . ?
C8 C4 C5 O3 160.12(8) . . . . ?
C3 C4 C5 O3 -71.26(10) . . . . ?
C8 C4 C5 C6 -80.06(10) . . . . ?
C3 C4 C5 C6 48.57(11) . . . . ?
C8 C4 C5 C11 48.05(11) . . . . ?
C3 C4 C5 C11 176.67(9) . . . . ?
C1 O1 C6 C5 -33.47(10) . . . . ?
O3 C5 C6 O1 60.68(10) . . . . ?
C11 C5 C6 O1 173.51(8) . . . . ?
C4 C5 C6 O1 -58.24(10) . . . . ?
C5 C4 C8 C9 -52.42(12) . . . . ?
C3 C4 C8 C9 177.09(9) . . . . ?
C4 C8 C9 C10 57.15(12) . . . . ?
C8 C9 C10 C11 -58.28(12) . . . . ?
O3 C5 C11 C10 -164.15(8) . . . . ?
C6 C5 C11 C10 80.09(10) . . . . ?
C4 C5 C11 C10 -50.15(11) . . . . ?
C9 C10 C11 C5 55.96(12) . . . . ?
 
loop_
 _geom_hbond_atom_site_label_D
 _geom_hbond_atom_site_label_H
 _geom_hbond_atom_site_label_A
 _geom_hbond_distance_DH
 _geom_hbond_distance_HA
 _geom_hbond_distance_DA
 _geom_hbond_angle_DHA
 _geom_hbond_site_symmetry_A
O4 H4O O1  0.82(2) 2.00(2) 2.6853(12) 140.7(19) .
 
_diffrn_measured_fraction_theta_max    0.955
_diffrn_reflns_theta_full              25.00
_diffrn_measured_fraction_theta_full   0.991
_refine_diff_density_max    0.385
_refine_diff_density_min   -0.259
_refine_diff_density_rms    0.057
# END OF CIF
